# Supplementary material for: Junction Mapper is a novel computer vision tool to decipher cell–cell contact phenotypes
Source: eLife. 2019 Dec 3;8:e45413. doi: 10.7554/eLife.45413 (PMC7034980; doi:10.7554/eLife.45413)
Supplement: Figure 2—figure supplement 2—source data 1. [file elife-45413-fig2-figsupp2-data1.xlsx]

## Sheet: Sheet1
Source Data complementing Figure 2-figure supplement 2
Cardiomyocytes (β-catenin)
	PSNR [dB]	SNR [dB]
Original vs. Noise 1	21.3296	0.498092
Original vs. Nosie 2	18.1266	-2.70495
Original vs. Noise 3	16.2521	-4.57942
H-Ras (E-cadherin)
	PSNR [dB]	SNR [dB]
Original vs. Noise 1	22.504	4.7177
Original vs. Nosie 2	19.944	2.1577
Original vs. Noise 3	18.3315	0.545207
