# Supplementary material for: Junction Mapper is a novel computer vision tool to decipher cell–cell contact phenotypes
Source: eLife. 2019 Dec 3;8:e45413. doi: 10.7554/eLife.45413 (PMC7034980; doi:10.7554/eLife.45413)
Supplement: Figure 3—figure supplement 1—source data 1. [file elife-45413-fig3-figsupp1-data1.xlsx]

## Sheet: Explanation
Source Data complementing Figure 3-figure supplement 1
Panel C data	C	epithelia dilation 2, 4, 6, 8 - interface contour, fragmented junction contour
Panel D data	D	epithelia dilation 2, 4, 6, 8 - E-cadherin area, E-cadherin intensity
Panel G data	G	endothelia dilation 2, 4, 6, 8 - interface contour, fragmented junction contour
Panel H data	H	endothelia dilation 2, 4, 6, 8 - VE-cadherin area, VE-cadherin intensity

## Sheet: C
	Rac1 expression												control
	Junction 1				Junction 2				junction 3				Junction 1				Junction 2				junction 3
	dilation 2	dilation 4	dilation 6	dilation 8	dilation 2	dilation 4	dilation 6	dilation 8	dilation 2	dilation 4	dilation 6	dilation 8	dilation 2	dilation 4	dilation 6	dilation 8	dilation 2	dilation 4	dilation 6	dilation 8	dilation 2	dilation 4	dilation 6	dilation 8
interface contour	78.6985	78.6985	78.6985	78.6985	324.108	324.108	324.108	324.108	175.527	175.527	175.527	175.527	88.3137	88.3137	88.3137	88.3137	34.3137	34.3137	34.3137	34.3137	117.468	117.468	117.468	117.468
fragmented junction contour	50.7897	50.7897	50.7897	50.7897	31.6208	31.6208	31.6208	31.6208	119.956	119.956	119.956	119.956	61.8191	61.8191	61.8191	61.8191	17.129	17.129	17.129	17.129	73.465	73.465	73.465	73.465

## Sheet: D
	Rac1 expression												control
	Junction 1				Junction 2				junction 3				Junction 1				Junction 2				junction 3
	dilation 2	dilation 4	dilation 6	dilation 8	dilation 2	dilation 4	dilation 6	dilation 8	dilation 2	dilation 4	dilation 6	dilation 8	dilation 2	dilation 4	dilation 6	dilation 8	dilation 2	dilation 4	dilation 6	dilation 8	dilation 2	dilation 4	dilation 6	dilation 8
E-cadherin area	265	384	411	417	179	326	401	450	579	878	1072	1152	306	398	442	504	96	156	216	299	295	412	488	555
E-cadherin intensity	35280	46351	48089	48430	13876	24655	30253	33683	67756	96890	111454	117237	28848	36138	40516	45928	9665	15214	20852	27425	26016	38776	46330	52321

## Sheet: G
	Thrombin												control
	Junction 1				Junction 2				junction 3				Junction 1				Junction 2				junction 3
	dilation 2	dilation 4	dilation 6	dilation 8	dilation 2	dilation 4	dilation 6	dilation 8	dilation 2	dilation 4	dilation 6	dilation 8	dilation 2	dilation 4	dilation 6	dilation 8	dilation 2	dilation 4	dilation 6	dilation 8	dilation 2	dilation 4	dilation 6	dilation 8
interface contour	187.439	187.439	187.439	187.439	135.811	135.811	135.811	135.811	242.853	242.853	242.853	242.853	103.284	103.284	103.284	103.284	124.61	124.61	124.61	124.61	221.125	221.125	221.125	221.125
fragmented junction contour	159.662	159.662	159.662	159.662	87.1838	87.1838	87.1838	87.1838	223.297	223.297	223.297	223.297	103.284	103.284	103.284	103.284	124.61	124.61	124.61	124.61	221.125	221.125	221.125	221.125

## Sheet: H
	Thrombin												control
	Junction 1				Junction 2				junction 3				Junction 1				Junction 2				junction 3
	dilation 2	dilation 4	dilation 6	dilation 8	dilation 2	dilation 4	dilation 6	dilation 8	dilation 2	dilation 4	dilation 6	dilation 8	dilation 2	dilation 4	dilation 6	dilation 8	dilation 2	dilation 4	dilation 6	dilation 8	dilation 2	dilation 4	dilation 6	dilation 8
VE-cadherin area	880	1544	1985	2233	521	939	1309	1638	1223	2253	3297	4333	579	1088	1617	2173	757	1433	2130	2845	1195	2177	3099	3928
VE-cadherin intensity	74805	123464	152917	169520	45714	76876	102438	124649	145095	254278	350982	435851	75681	136805	194912	250745	86734	159994	230542	298737	152189	258113	345696	420717
