# Supplementary material for: Junction Mapper is a novel computer vision tool to decipher cell–cell contact phenotypes
Source: eLife. 2019 Dec 3;8:e45413. doi: 10.7554/eLife.45413 (PMC7034980; doi:10.7554/eLife.45413)
Supplement: Figure 3—figure supplement 2—source data 1. [file elife-45413-fig3-figsupp2-data1.xlsx]

## Sheet: Explanation
Source Data complementing Figure 3-figure supplement 2
Panel C data	C	epithelia threshold 0, 50, 100, 150 - interface contour, fragmented junction contour
Panel D data	D	epithelia threshold 0, 50, 100, 150 - E-cadherin area, E-cadherin intensity
Panel G data	G	endothelia threshold 0, 50, 100, 150 - interface contour, fragmented junction contour
Panel H data	H	endothelia threshold 0, 50, 100, 150 - VE-cadherin area, VE-cadherin intensity

## Sheet: C
	Rac1 expression												control
	Junction 1				Junction 2				junction 3				Junction 1				Junction 2				junction 3
	threshold 0	threshold 50	threshold 100	threshold 150	threshold 0	threshold 50	threshold 100	threshold 150	threshold 0	threshold 50	threshold 100	threshold 150	threshold 0	threshold 50	threshold 100	threshold 150	threshold 0	threshold 50	threshold 100	threshold 150	threshold 0	threshold 50	threshold 100	threshold 150
interface contour	82.1127	82.1127	82.1127	82.1127	324.108	324.108	324.108	324.108	173.527	173.527	173.527	173.527	88.3137	88.3137	88.3137	88.3137	34.3137	34.3137	34.3137	34.3137	117.468	117.468	117.468	117.468
fragmented junction contour	82.1127	50.7897	44.6788	21.7055	286.612	31.6208	0	0	159.342	119.956	81.5962	46.0082	88.3137	61.8191	19.8126	5	34.3137	17.129	8.24621	0	114.64	73.465	6.53732	1

## Sheet: D
	Rac1 expression												control
	Junction 1				Junction 2				junction 3				Junction 1				Junction 2				junction 3
	threshold 0	threshold 50	threshold 100	threshold 150	threshold 0	threshold 50	threshold 100	threshold 150	threshold 0	threshold 50	threshold 100	threshold 150	threshold 0	threshold 50	threshold 100	threshold 150	threshold 0	threshold 50	threshold 100	threshold 150	threshold 0	threshold 50	threshold 100	threshold 150
E-cadherin area	1248	411	219	110	4096	401	50	8	2313	1066	482	175	905	398	126	28	424	156	59	16	1275	412	113	61
E-cadherin intensity	62706	48089	33936	20280	89631	30253	6196	30830	1326	111099	68732	30830	499140	361380	169660	52320	220770	152140	80390	27420	605720	387760	186180	122850

## Sheet: G
	Thrombin												control
	Junction 1				Junction 2				junction 3				Junction 1				Junction 2				junction 3
	threshold 0	threshold 50	threshold 100	threshold 150	threshold 0	threshold 50	threshold 100	threshold 150	threshold 0	threshold 50	threshold 100	threshold 150	threshold 0	threshold 50	threshold 100	threshold 150	threshold 0	threshold 50	threshold 100	threshold 150	threshold 0	threshold 50	threshold 100	threshold 150
interface contour	165.782	165.782	165.782	165.782	142.397	142.397	142.397	142.397	216.468	216.468	216.468	216.468	103.284	103.284	103.284	103.284	124.61	124.61	124.61	124.61	221.125	221.125	221.125	221.125
fragmented junction contour	216.468	216.468	152.596	59.2044	165.782	152.248	36.799	0	142.397	84.7695	43.8914	2.41421	103.284	103.284	91.1647	27.3137	124.61	124.61	79.7401	5.82843	221.125	221.125	194.732	53.3848

## Sheet: H
	Thrombin												control
	Junction 1				Junction 2				junction 3				Junction 1				Junction 2				junction 3
	threshold 0	threshold 50	threshold 100	threshold 150	threshold 0	threshold 50	threshold 100	threshold 150	threshold 0	threshold 50	threshold 100	threshold 150	threshold 0	threshold 50	threshold 100	threshold 150	threshold 0	threshold 50	threshold 100	threshold 150	threshold 0	threshold 50	threshold 100	threshold 150
VE-cadherin area	3292	3227	1742	346	2688	1882	260	0	2298	1240	198	10	1617	1617	1273	211	2130	2130	1224	88		3323	3099	1794	412
VE-cadherin intensity	348849	346455	228051	57365	174611	145765	28266	0	130289	98306	23027	1568	194912	194912	163946	36516	230542	230542	152511	14325	355662	345696	241109	73815
