# Supplementary material for: Junction Mapper is a novel computer vision tool to decipher cell–cell contact phenotypes
Source: eLife. 2019 Dec 3;8:e45413. doi: 10.7554/eLife.45413 (PMC7034980; doi:10.7554/eLife.45413)
Supplement: Figure 3—source data 1. [file elife-45413-fig3-data1.xlsx]

## Sheet: Explanation
Source Data 3 complementing Figure 3
Figure 3 Panel C data	C	length-based measurements
Figure 3 Panel D data	D	area-based measurements

## Sheet: C
	H-Ras			Control
	Junction 1	Junction 2	Junction 3	Junction 1	Junction 2	Junction 3
interface contour	136.255	72.5563	121.841	106.61	88.3553	71.598
junction contour	110.303	22.2426	84.6359	90.2965	80.1058	71.2417
fragmented junction contour	60.7887	8.24264	47.2885	90.2965	76.1058	54.0416

## Sheet: D
	H-Ras			Control
	Junction 1	Junction 2	Junction 3	Junction 1	Junction 2	Junction 3
interface area	1097	586	998	972	745	500
junction area	268	37	242	433	377	277
