# Supplementary material for: Junction Mapper is a novel computer vision tool to decipher cell–cell contact phenotypes
Source: eLife. 2019 Dec 3;8:e45413. doi: 10.7554/eLife.45413 (PMC7034980; doi:10.7554/eLife.45413)
Supplement: Figure 4—source data 1. [file elife-45413-fig4-data1.xlsx]

## Sheet: Explanation
Source Data 4 complementing Figure 4
Figure 4 Panel B data	B	interface contour
Figure 4 Panel C data	C	interface area
Figure 4 Panel D data	D	fragmented junction contour
Figure 4 Panel E data	E	E-cadherin area
Figure 4 Panel F data	F	straight line interface length

## Sheet: B
control	en	ee
89.4558	60.799	73.3137
34.8995	62.2843	47.2843
57.6985	90.1838	95.1127
20.4142	83.9411	53.6985
122.154	112.841	42.9706
65.7695	43.1421	52.2132
99.7401	71.1838	118.811
27.2426	109.255	33.1421
22.2426	55.4558	107.083
66.598	81.4558	117.275
50.8995	72.4558	48.9706
28.0711	63.6568	62.6274
63.3137	97.1127	54.6985
56.4558	37.0711	41.799
57.598	21.4142	107.255
38.4558	99.7599	107.255
39.4853	47.0416	95.9706
62.3848	62.9706	128.527
58.0416	78.9706	62.2132
61.0122	188.368	86.4558
48.2132	60.5269	46.2843
20.4853	58.8701	71.6985
28.6568	57.9706	98.3553
50.4558	92.1838	89.1127
42.6274	42.3848	23.8284
83.8406	33.9706	67.1127
111.527	45.3137	94.3553
64.2132	94.6274	108.941
88.7695	66.9411	77.8701
62.2843	53.799	112.426
29.6568	48.8701	39.3848
39.3137	134.184	131.012
77.799	69.1838	70.3553
105.132	112.397	142.326
72.1127	97.9411	78.8701
54.3553	22.0711	50.4558
74.4558	99.0122	103.912
43.8995	44.1421	137.255
93.4975	175.569	71.5563
94.6274	25.4853	122.841
119.556	61.799	55.6985
46.0416	42.799	83.4975
96.2843	44.3848	125.74
114.711	68.4558	135.054
74.8701	118.225	27.3137
101.456	100.456	52.8701
116.456	27.4853	125.083
68.5563	100.456	77.2843
64.9706	88.598	37.3137
109.598	97.598	44.0711
41.799	47.0416	80.0122
65.0833	105.941	60.2132
89.1543	109.255	84.4558
77.799	60.6985	70.1772
60.7279	135.012	147.012
42.6568	66.6985	139.255
91.397	59.6274	64.7695
48.799	84.669	101.882
78.799	67.5563	163.64
41.0416	28.9706	108.569
44.7279	74.7182	52.9706
55.8995	54.2132	109.841
83.0122	46.3137	17.2426
52.9411	38.799	87.6177
60.3553	45.0711	104.255
63.2843	43.8995	93.3553
35.7279	66.2843	115.698
29.8995	60.2843	132.782
42.1421	67.799	28.8995
84.3553	77.3848	112.669
28.3137	61.3553	65.2132
50.6568	50.6274	73.8406
52.6985	83.1127	152.488
46.3848	85.8406	78.6985
53.3137	38.9706
62.3137	77.3848
56.3137	65.2843
62.9706	58.4558
70.1421	28.1421
60.1838	30.3137
70.5563	85.4975
32.5564	36.1421
37.8995	43.9706
39.3137	36.3848
31.4853	70.1127
83.2843	65.1127
24.8284	120.64
46.233	49.4558
49.8995	83.799
48.3848	93.7401
42.3137	63.1421
72.5269	62.0416
72.5563	83.4975
60.8995	91.0416
64.6985	43.7279
58.799	55.8701
45.3137	129.255
62.799	74.8406
47.1127	74.3553
55.2132	45.3137
43.8995	48.6274
52.6985	114.841
202.794	56.6985
43.6274	110.74
37.4853	79.598
105.296	88.8701
108.113	146.983
115.225	77.3553
49.799	123.184
106.456	166.498
99.0122	120.154
176.397	40.8701
62.799	133.498
150.701	85.1838
113.539	58.4558
105.556	51.799
88.0833	28.3137
39.2132	90.2843
80.6274	90.6985
99.2548	31.4853
88.5685	74.7695
85.799	96.3553
26.4853	93.5269
128.669	57.3848
26.4853	62.3848
82.9411	39.3848
27.8284	87.4264
54.6274	108.841
72.2132	101.184
32.799	110.769
124.61	49.4853
62.9411	74.1421
69.0122	38.5564
170.772	40.3137
38.7279	126.912
40.2132	47.6985
81.1838	58.1127
48.799	105.012
93.9117	44.7279
172.225	18.0711
43.3848	64.7695
49.4558	82.1838
27.4853	73.4558
107.799	116.225
43.9706	106.426
109.811	60.5564
41.7279	50.3848
119.527	79.2132
74.3848	58.0416
47.3137	21.0711
79.598	20.0711
98.1543	57.9706
59.598	75.0122
59.3848	29.3137
136.326	97.598
99.4558	50.9411
67.9706	93.2843
52.4558	40.6274
37.0711	71.1127
66.9411	152.024
67.3848	20.8995
73.9706	80.8406
138.51	76.6274
61.5564	105.769
37.7279	69.6274
78.1838	51.9706
100.882	46.8701
52.5564	145.284
83.763	57.0416
13.2426	117.527
37.6274	53.1421
57.3553	99.9762
62.3137	64.5269
62.7279	22.4853
38.5564	44.4558
108.569	22.0711
52.2132	48.7279
70.2132	43.0416
35.1421	63.9411
25.2426	92.7695
75.0416	101.698
26.0711	27.1421
47.4558	63.5564
109.468	131.569
33.2132	23.0711
59.1421	144.669
38.5564	39.8995
56.0416	102.154
49.9706	35.4558
39.4558	161.853
48.8701	29.9706
22.7279	67.4558
53.1127	185.539
92.2548	46.4558
64.0416	42.799
44.799	79.3553
48.0416	85.1838
39.799	80.5563
29.2426	130.326
68.5269	31.3848
55.2843	41.8701
37.9706	144.581
77.9411	44.0416
35.8995	217.167
45.3848	94.397
43.3137	92.2254
20.3137	51.7279
50.6274	76.1127
55.0416	112.598
40.3848	124.983
96.6985	98.1838
25.1421	154.368
47.5564	54.9706
40.7279	149.397
77.1127	81.4975
59.2843	107.527
54.1838	118.912
91.5563	124.154
164.841	35.1421
37.7279	167.267
153.634	124.569
64.2132	92.7695
49.9411	37.799
19.3137	36.2132
55.8701	66.7279
13.6569	111.426
79.6274	33.0711
45.799	46.0416
62.0122	86.7695
114.154	65.1127
48.1127	82.9411
36.3848	25.5563
117.388	88.9051
36.9706	130.841
42.0416	17.4142
64.9411	60.2132
40.799	83.7695
67.669	89.3553
63.6274	65.9706
45.1127	27.8995
113.983	45.0416
43.0416	57.2843
88.7695	47.8995
112.213	50.5564
71.3553	61.1838
20.8284	70.1127
127.326	45.2132
11.4142	67.0416
104.154	77.7695
142.681	32.9706
144.63	60.799
85.4558	78.5269
65.8995	29.6568
147.51	69.0416
135.912	16.6568
75.3848	68.669
12.4142	107.841
166.912	38.3137
146.498	74.2843
83.4975	47.2843
53.799	68.7695
110.841	54.6274
58.4558	47.2843
76.0122	169.439
113.853	66.3137
109.569	111.468
138.297	63.6985
56.3553	54.4558
177.51	70.8406
54.8284	39.6568
117.64	57.4558
131.983	60.8701
39.5564	15.2426
30.4853	74.6274
83.8406	121.355
30.5563	63.1127
12.8284	47.9706
106.983	27.8995
61.9411	69.799
101.971	50.5564
81.2132	40.2132
38.7279	9.82843
108.113	39.7279
23.3137	45.2132
55.9346	36.3848
75.2132	51.799
172.125	74.4558
19.2426	59.799
98.9411	57.6985
55.2132	56.4558
130.64	84.0122
44.1127	116.326
86.7695	22.4853
50.2132	72.9411
111.498	38.5564
103.941	47.9706
15.6569	39.9706
62.799	51.7279
51.7696	90.6985
25.0711
204.61
55.0416
41.2426
21.7279
131.539
43.9706
114.841
69.3848
46.3848
73.6274
33.1421
54.7279
34.8284
45.3848
82.1838
54.799
22.3137
57.6274
32.4853
73.1127
52.1127
86.1127
98.9828
62.1127
24.8284
52.2843
116.711
58.8701
95.4975
32.2132
74.9706
56.8701
76.2843
68.3848
61.3137
44.2132
106.255
62.3553
87.5269
81.2132
48.3553
32.1421
76.2132
34.3137
55.2843
73.0416
91.7695
68.8701
71.0416
110.841
48.7279
75.1838
46.2132
45.6274
128.184
62.1127
103.326
36.1421
63.0416
69.4264
35.9706
107.941
84.0416
56.7279
97.9411
107.659
31.8995
101.627
36.9706
77.0833
38.6274
56.5269
69.4558
40.9706
56.4853
53.5564
28.3137
79.3193
41.1421
41.0416
47.3848
24.5563
80.3848
89.9706
35.3848
102.154
48.3137
35.5564
54.0122
43.3137
46.4853
23.0711
56.5269
65.4558
19.8995
81.1421
71.5269
24.8995

## Sheet: C
control	en	ee
503	356	405
213	375	300
354	520	543
129	488	334
711	648	263
404	260	315
596	433	702
167	632	210
142	337	626
412	467	646
293	422	291
175	351	368
357	553	339
342	220	253
367	134	623
252	562	623
234	292	528
362	363	712
340	443	365
386	1071	476
295	372	295
139	356	423
175	338	564
312	538	512
269	254	148
504	218	403
624	267	543
372	529	614
519	405	451
375	321	645
181	306	247
237	748	733
440	423	425
565	668	805
428	560	456
345	142	312
432	576	614
255	265	772
549	980	401
529	163	699
644	361	344
288	266	485
545	272	724
619	399	787
436	693	176
565	558	318
641	172	716
389	554	447
373	522	227
625	565	255
261	293	481
408	601	352
546	631	482
441	369	408
344	756	815
246	399	783
563	352	391
295	512	619
446	384	922
263	193	642
266	408	313
318	325	626
444	272	116
335	246	490
367	260	605
380	258	540
221	385	644
188	365	795
255	389	183
470	436	652
182	380	378
286	309	454
329	483	841
282	514	459
307	243
352	437
320	390
363	352
395	185
378	192
399	519
209	225
228	268
237	232
194	415
480	393
153	715
258	307
288	470
292	559
252	359
432	367
409	510
343	513
389	261
346	341
267	733
366	458
303	445
330	267
257	299
329	659
1201	349
274	651
224	475
646	505
608	839
678	460
301	688
592	925
576	701
985	266
366	759
869	488
693	352
574	311
531	182
248	515
459	477
578	193
543	449
479	555
169	537
732	336
169	362
486	247
168	520
329	628
415	580
216	626
758	284
386	412
426	239
970	242
236	728
252	304
482	358
296	605
563	266
963	125
267	399
307	486
174	427
591	666
268	615
657	348
251	302
664	450
422	348
277	140
477	134
588	338
377	456
347	187
778	558
557	326
388	528
322	256
220	422
398	889
384	140
418	485
764	436
353	602
231	399
466	308
622	295
309	789
474	343
97	652
244	310
360	583
352	389
354	146
239	282
645	143
312	286
404	273
220	391
157	538
433	563
156	180
297	364
663	760
220	150
340	801
239	238
338	611
298	235
256	950
302	198
156	397
333	1045
548	289
375	266
274	470
298	500
251	449
177	747
412	203
331	268
238	879
461	277
217	1242
277	578
257	571
142	301
309	445
333	642
252	729
547	565
170	893
282	323
246	853
453	474
360	607
348	689
504	721
909	220
230	978
858	724
375	538
321	241
137	235
297	376
100	640
454	197
281	288
391	509
671	392
308	486
232	174
674	519
228	728
268	114
396	355
256	486
427	520
374	378
288	178
666	283
273	346
519	278
611	299
430	383
133	418
733	279
84	389
612	464
858	213
823	348
487	462
368	181
882	403
766	116
427	432
89	621
928	232
821	434
510	256
321	419
639	329
352	300
461	982
710	372
642	673
808	376
355	331
1036	439
303	231
700	347
764	366
244	107
189	429
504	678
199	383
93	288
597	178
381	398
558	299
460	255
235	78
603	238
157	280
331	232
429	311
979	424
127	351
558	354
330	342
765	501
288	677
509	149
302	436
650	236
591	283
111	248
366	301
334	519
160
1153
333
237
149
783
267
658
397
282
420
210
316
203
277
488
326
152
344
199
433
328
498
599
378
153
325
703
356
570
215
421
344
445
392
347
269
618
382
499
460
315
199
432
209
340
422
533
406
413
628
286
453
282
279
708
375
613
225
371
430
228
611
478
326
516
620
198
558
233
474
249
352
405
253
319
309
182
465
250
263
287
169
452
498
227
611
280
224
351
254
268
150
352
386
138
448
427
161

## Sheet: D
control	en	ee
56.5564	19.8284	19.6568
28.8995	16.6568	6.82843
42.6274	8.41421	12.6569
17	23.6568	15.8995
105.255	43.3137	27.7279
32.6274	23.4853	26.8995
24.5563	27.1421	0
19.2426	32.7279	2.41421
10.4142	39.799	25.1421
26.3848	48.7279	31.3137
14.2426	30.8995	1
11.4142	17.8284	6.41421
6.82843	61.2132	31.1421
12.2426	1	22.7279
34.4558	8.41421	28.6568
13.4853	66.7695	36.7279
4.41421	1.41421	14.4142
11.4142	17.8284	9.41421
5.24264	34.6568	58.2132
34.4558	28.1421	2
25.5563	43.6274	5.82843
18.0711	37.2132	0
15.8284	8.41421	7.24264
48.4558	61.0416	3.41421
23.7279	36.5564	5
1.41421	20.8995	23.8995
66.5563	6.41421	76.5269
36.5564	75.9706	0
73.4558	26.8995	57.3848
0	15.0711	0
16.8284	18.5563	8.24264
29.0711	24.8284	71.8701
26.4853	7.07107	0
22.0711	84.4264	14.0711
37.5564	53.3848	13.4853
43.2843	10.8284	18.3137
63.799	82.7695	14.0711
19.2426	6.82843	59.9706
74.2548	97.3553	11.2426
57.1421	11.6569	51.9706
52.4853	48.9706	0
14.8995	3.41421	9.24264
26.1421	0	12.2426
59.4264	26.3137	34.5564
27.8995	107.811	7.82843
57.7279	32.4853	3.41421
78.3848	0	11.6569
40.3137	52.7279	14.6569
34.6568	3.41421	5
104.355	19.6568	9.82843
39.3848	28.1421	37.6274
57.4264	36.4853	25.7279
66.1838	18.6568	36.3137
41.5564	3	8.07107
20.2426	43.1421	14
24.4142	6	7.41421
0	1	0
0	3	5.65685
55.5564	6.41421	1
38.0416	4.82843	1.41421
14.4142	38.5564	0
46.0711	7.24264	58.2132
67.3553	29.4853	13.2426
45.1127	16.4853	43.6274
60.3553	40.0711	47.6274
29.7279	17.4142	1
24.0711	18.3137	18.2426
19.8284	15.6569	0
9.82843	39.4853	0
20.6568	63.1421	42.799
23.0711	44.6985	16.6568
24.2426	23.1421	38.0416
30.3848	45.3137	7.24264
38.5564	49.9411	0
35.8995	31.9706
35.0711	28.0711
31.8995	42.3848
40.8995	20.6568
67.7279	3
57.7696	7.24264
28.2426	17.3137
30.5563	12.6569
37.8995	8.41421
35.3137	10.2426
31.4853	63.1127
77.4558	57.2843
21.4142	46.5269
29.9706	36.6274
39.4853	61.5564
24.8995	10.8284
33.0711	0
57.0416	0
41.4853	0
20.0711	19.4853
46.0416	0
58.799	0
33.6568	19.2426
62.799	58.1838
22.5563	33.799
26.1421	24.0711
6.82843	27.3137
17.0711	49.7279
52.4264	13.0711
24.3137	32.5564
23.8284	70.1838
80.9828	75.0416
82.6274	138.154
94.9117	37.799
24.4853	90.4558
89.799	101.627
24.7279	104.498
111.184	23.1421
53.799	121.426
116.296	28.3137
39.4558	10.6569
74.4853	0
0	6.82843
10.8284	66.0416
9.24264	0
0	5
87.1543	27.799
76.799	41.3848
23.0711	0
121.841	21.2426
26.4853	0
70.6985	0
27.8284	16.8995
39.2132	33.2132
63.3848	26.8995
32.799	43.3137
69.669	9.41421
6.24264	5
23.1421	10.6569
69.669	1
22.4853	9.82843
31.1421	0
29.3137	26.3137
39.9706	47.9706
80.0122	31.8995
156.498	15.0711
36.5564	1
21.5563	28.5563
15.6569	3
50.4853	73.8406
21.8995	55.799
64.598	0
20.4853	3.41421
72.2132	52.5564
52.5564	22.7279
16.0711	15.6569
0	17.0711
75.2548	25.4853
53.1838	59.5269
36.8995	21.8995
123.669	54.3848
32.6568	11.8995
2.41421	41.7279
1.41421	20.8995
15.4142	40.9706
17.8995	12.0711
17.6568	9.82843
48.4853	0
68.9117	29.0711
44.3137	39.7279
23.0711	14.4142
24.3137	11.8284
89.2254	18.0711
47.5564	38.2426
65.2843	46.3848
12.2426	18.8284
22.5563	25.6568
41.4558	32.3848
51.8995	55.8701
31.8284	13.8284
30.7279	23.5563
49.1127	13.6569
24.8995	26.6568
29.8284	24.5563
25.8995	41.2132
23.2426	8.07107
54.3848	75.799
3	5.41421
27.9706	58.7279
16.3137	103.841
13.0711	17.6568
9.24264	109.769
8.65686	30.0711
14.0711	51.1127
47.5564	9.07107
22.9706	0
25.3137	0
17.4853	25.6568
53.1127	57.6274
81.0122	40.2132
41.1421	6.24264
23.8995	1
40.799	12.4142
17.7279	58.3137
17.8284	7.82843
58.6985	18.7279
46.4558	31.2132
32.1421	91.6396
72.1127	12.0711
27.6568	55.8701
30.1421	37.4558
30.8995	41.4558
7.82843	12
29.7279	8.41421
26.3137	15.2426
13.2426	38.4853
32.0711	14.8284
5.82843	2.82843
24.0711	1
14.4142	21.4853
40.799	38.0416
26.3137	26.4853
39.2843	44.9706
78.7279	10.6569
103.698	9.41421
22.4853	4.41421
58.4264	11.0711
36.1421	0
12.4853	15.8995
7.24264	3.41421
3	50.0711
1	24.0711
49.7279	19.2426
41.5564	13.2426
40.8701	7.82843
103.326	4.41421
45.6985	19.0711
36.3848	16.7279
17.0711	74.1838
7.82843	44.3848
0	17.4142
0	25.0711
26.5563	34.9706
2.82843	55.1127
10.8284	22.0711
11.8995	23.0711
44.2132	15.8995
5.41421	44.3848
68.2843	27.4142
99.3848	15.2426
56.6985	35.0416
7.82843	15.6569
77.9411	20.1421
11.4142	22.0711
54.2843	25.0711
138.267	21.7279
113.539	12.2426
72.6274	62.6985
37.6568	17.8284
125.953	31.8995
65.5563	3
38.6568	9.65686
10.4142	29.8995
66.9706	13.4142
138.255	18.0711
52.1838	5.82843
25.4853	38.9706
97.7695	13.4853
55.0416	6.82843
61.7696	19.4853
32.4558	47.6568
87.2548	94.8112
2	9.65686
42.0416	39.5564
120.225	14.3137
39.8284	7
113.225	45.2132
86.4264	6.41421
20.0711	5.82843
17.8284	24.6568
49.4558	10
23.4853	3.82843
1	21.4853
44.6274	14.8284
26.5563	63.799
67.8995	32.3137
20.0711	31.799
20.4853	8.82843
36.3137	21.0711
19.3137	20.7279
7.24264	9.82843
56.3848	35.5564
2	54.799
16.2426	28.4853
23.7279	3
34.1421	19.3137
13.6569	26.0711
39.6985	13.0711
51.2132	2
22.6568	2
65.5269	13.6569
50.3137	5.41421
12.2426	9.82843
19.8284	21
30.0416	5
19.6568
23.0711
34.5564
22.4142
13.0711
29.799
9.41421
45.799
58.9706
42.9706
59.9706
0
10.8284
34.8284
40.5564
61.5269
47.799
18.8995
36.7279
32.4853
57.2132
51.1127
77.8701
48.6985
13.2426
14.4142
44.2132
71.4264
29.3848
46.6985
32.2132
52.7279
38.9706
68.6274
45.1421
33.4853
15.6569
79.5269
4.41421
26.4853
64.8995
24.9706
8.24264
53.8995
21.4853
36.2132
26.4853
44.1421
39.9706
67.0416
54.0416
33.4853
45.4558
0
21.8995
90.3848
43.0416
24.3848
4.82843
45.3848
62.1838
33.5564
91.8701
67.1421
21.2426
66.4558
33.3848
22.0711
46.3137
31.1421
45.4558
10.6569
7.41421
24.6568
24.8995
24.2426
33.8995
4
40.4558
40.1421
23.5563
35.1421
20.5563
49.8995
36.4853
27.5563
54.5269
41.8995
35.5564
54.0122
42.3137
32.2426
18.2426
27.1421
25.4853
19.8995
21.2426
18.3137
5.41421

## Sheet: E
control	en	ee
311	93	91
132	93	49
185	74	69
90	108	99
415	260	160
107	107	139
95	126	14
74	154	20
40	131	120
108	221	141
77	112	14
45	111	41
44	222	164
53	24	112
86	52	181
48	241	226
41	28	50
69	133	54
24	146	281
82	189	24
82	211	37
71	170	6
60	73	28
191	311	34
98	159	27
1	104	107
282	86	392
152	344	9
342	160	264
36	101	13
75	103	70
111	118	308
154	70	25
78	406	86
214	265	67
197	57	48
287	357	172
104	53	228
296	484	30
258	77	211
207	224	0
48	29	50
188	9	72
171	112	174
135	501	62
222	166	33
285	9	61
166	199	120
204	38	33
467	133	49
225	137	190
235	230	134
325	121	159
180	30	44
88	209	52
115	46	54
23	39	26
14	66	31
256	66	12
166	49	15
102	155	2
190	54	233
288	133	68
216	111	180
268	183	146
137	95	5
96	101	103
97	112	7
70	200	2
91	294	226
115	193	96
135	131	196
168	237	63
187	175	5
145	165
135	154
120	211
189	114
308	31
273	19
148	45
165	79
175	93
175	36
171	370
366	323
118	161
121	115
149	270
115	120
143	13
268	4
175	7
106	63
231	0
321	3
196	112
359	256
100	155
114	108
35	122
132	254
259	57
103	112
89	313
240	297
287	602
379	182
138	417
331	456
95	488
492	114
238	500
480	126
290	57
327	19
7	44
102	284
37	1
2	26
388	106
324	198
135	0
518	104
113	5
294	3
137	108
212	157
301	156
153	254
386	47
33	22
158	33
359	18
100	43
122	8
141	84
175	195
394	137
659	81
190	7
84	123
41	40
185	354
100	248
234	0
74	29
266	174
227	130
75	97
14	76
329	118
210	246
153	77
523	222
108	59
10	199
10	91
54	209
84	103
86	43
183	4
254	147
165	170
110	95
128	46
379	93
213	164
288	208
67	73
90	126
173	164
228	224
123	81
138	110
265	55
81	127
101	95
113	188
107	51
245	280
27	53
132	250
112	421
53	84
95	502
33	134
57	216
243	63
131	4
117	0
86	134
259	343
356	167
190	20
121	14
196	81
86	235
73	80
304	91
206	112
140	352
323	45
117	232
131	184
120	194
76	70
115	29
126	73
70	234
138	97
41	16
100	23
64	93
178	179
121	89
160	156
322	48
477	58
113	56
291	77
155	6
79	78
73	30
40	196
20	162
197	105
170	79
222	47
400	14
197	66
160	102
89	329
28	283
0	79
1	130
145	151
67	192
57	123
81	115
201	98
23	210
264	147
435	82
256	119
52	73
301	88
77	95
265	130
653	109
461	61
328	278
178	82
672	153
328	19
174	45
69	152
303	60
718	109
241	50
133	210
365	96
307	57
340	197
248	197
404	399
28	53
247	175
550	64
193	46
533	203
384	41
94	39
85	119
254	40
120	36
23	83
202	76
98	279
250	139
84	130
75	54
163	101
87	140
58	62
212	166
22	261
98	140
100	44
140	118
41	126
143	82
189	17
94	21
263	58
190	47
52	67
82	109
86	28
104
135
164
101
66
127
48
200
229
234
250
7
66
183
213
254
211
115
157
162
271
228
287
200
113
72
197
309
145
248
178
253
175
309
230
155
86
354
32
113
240
127
64
235
107
174
128
217
197
321
186
164
245
0
132
377
214
101
26
189
323
174
453
281
109
331
184
97
205
155
171
44
82
151
115
133
147
40
172
211
91
140
69
218
143
91
192
179
148
217
218
135
79
104
113
116
126
82
39

## Sheet: F
control	en	ee
77.3175	54.1202	69.0072
32.0156	53.2541	42.4382
50	82.2192	83.4865
20.025	68.9638	46.6905
104.216	102.201	35.609
57.3847	39.2046	42.72
84.8528	62.2013	101.833
26.0192	89.1403	30.6757
21.0238	49.3963	90.802
57.8014	73.4983	95.0158
48.2597	63.6946	38.4708
25.7099	59.0762	51.264
60.2993	77.4209	47.5079
52.2015	34.2345	34.9857
52.4976	20.0998	90.2109
35	81.4002	78.4347
37.2156	38.8973	91
57.7062	57.0088	103.817
49.1935	74.108	49.6488
56.0357	150.585	64.195
44.5982	52.4976	41.0122
16.9706	50	63.9062
27	46.4004	83.672
46.6155	80.9568	77.8332
38.4708	35.3553	22.0227
72.111	29.5466	60.9262
102.611	42.0476	83.8153
57.0701	83.1985	95.3363
77.4726	57.4543	61.6198
57.5847	49.3356	95.0158
28.0713	42.638	33.541
32.249	119.507	113.04
71.007	60.803	61.2944
86.1278	97.3088	102.176
65	84.119	68.7314
49.6488	19.4165	43.8292
68.6804	91.0824	88.459
39.1152	38.6005	119.365
82.2922	158.269	60.531
87.4643	21.095	106.513
112.071	55.0818	49.0917
40.4969	35	70
82.28	37.1214	101.637
89.1964	61.2944	117.337
67.0671	100.767	24
93.3809	90.934	46.0652
107.056	25.0799	87.2066
63.3482	77.8267	64.195
57.7235	64.4127	33.7343
100	77.0065	38.6394
36.0555	40.3113	70.6612
58.7963	91.9239	46.4866
77.8974	86.8332	77.026
72.1803	48.7955	57.28
51.2445	120.333	130.392
39.0513	55.9017	125.028
82.0366	54.1202	55.2268
43.4166	73.7564	90.609
73.5459	61.6604	124.064
35	26.4197	91.9348
41.5933	53.9352	48.0416
52	46.0977	98.0816
62.3699	42.9535	15.1327
46.0109	35.3412	70.4557
52.6972	43.1045	86.977
55.3263	40.4475	79.8499
32.573	56.4624	106.066
27.8926	53.6656	116.778
37.3363	56.0892	26.2488
73.0548	72.0069	94.5304
24.1868	54.2033	57.4282
44.1475	45.6946	66.5733
46.2277	71.5122	128.445
41.2311	75.1665	71.1688
49.8197	34.4383
58.0086	72.0069
51.0392	56.8243
58.1378	51.8941
62.8172	24.6982
55.9464	23.7697
66.6108	74.793
28.6531	31.7805
35.6931	40.2616
33.6155	32.6497
28.8617	60.3738
74.4648	55.1725
24.0832	101.533
36.2353	43.909
46.3897	77.0065
43.0813	82.6801
39.4588	59.3043
64.0781	55.7853
67.4759	73.5935
54.4518	85
54.5619	39.0513
48.5077	50.5668
36.7151	105.109
56.6127	66.3702
43.0116	61.8466
50	41.9762
41.3038	41.2311
45.9674	97.719
175.636	50.6063
38.5876	93.6002
34.7131	66.4831
95.8019	81.0062
101.415	130.924
98.3107	65.9242
43.382	104.235
100.285	152.895
68.4251	104.216
154.276	36.7696
55.3263	100.18
127.613	61
99.2472	49.0408
99.4082	46.2385
77.4209	24.1868
33.5261	77.2528
72.5672	69.4622
79.3095	25.632
76.4853	58.258
80.025	80.0562
24.0832	83.2166
116.379	52.7731
24.0416	54.5711
71.7008	33.3017
23.3452	74.2496
45.5412	96.566
67.2681	88.6848
29.0689	77.3692
112.161	45.7056
54.8179	69.3542
58.0517	35.1141
144.803	37.2156
32.6497	107.703
35.8469	43.566
70.7743	49.6488
41.1461	76.9415
76.844	39.2173
158.928	15.5242
37.6962	57.6888
42.45	69.9714
22.4722	67.1863
102.704	95.6034
37.5899	89.3085
97.0824	55.0363
34.4819	41.1096
110.023	72.0278
67.4685	48.8467
37.5766	19.0263
65.192	15.2643
84.1724	52.7731
53.7587	68.4251
52.7731	24.6982
124.724	79.1202
92.1954	46.8722
63.2851	82.2253
45	33.0151
32.249	60.531
56.0803	126.143
61.2944	17.4642
69.029	70.2353
109.344	70.0286
52.0384	91.4166
33.8379	60.6713
62.514	43.9659
89.9389	40.8167
47.2969	121.198
74	49.0408
12.0416	106.042
33.8379	49.163
51.8652	84.0536
59.0339	55.2268
59.2115	18.3848
32.45	39.0513
95.7183	19.105
47.8017	45.2769
63.7887	37.5367
29.4109	57.7062
22.2036	84.119
68.0074	91.444
21.3776	24.5968
41.0366	59.4138
97.8008	115.434
29.8329	21.587
54.0833	127.122
35.1141	33.1059
49.6588	88.6172
45.3982	24.3311
34.4093	138.221
43.382	26.4008
20	61.3514
48.3736	156.627
78.492	39.9625
50.9313	37.6431
40.8044	70.6824
43.382	70.1783
35.7771	76.0592
28.0178	109.444
58.4123	15.5242
48.4665	35.8469
34.5398	129.634
69.6419	33.3766
28.178	194.743
40.1622	84.6463
40	84.2021
18.3576	48.8365
46.2385	58.0775
47.4236	102.181
33.6155	104.924
88.459	81.5843
21.9317	130.729
43.1741	50.6952
38.0789	120.075
64.405	65.6049
50.8035	83.3846
49.8197	96.0833
87.0057	106.231
143.892	30.0832
32.0156	122.413
126.669	104.403
58.6941	81.6088
45.3431	34
17.2047	32.2025
40.6079	63.0079
12.1655	94.6414
74.7329	29.1548
41.7852	40.8167
56.4004	76.5506
103.87	53.2541
44.7772	75.6108
33.6155	23.3238
98.2344	73.4098
32.28	118.663
38.4708	17.0294
56.6127	49.0408
33.2415	75
62.2013	77.8332
57.3149	61.2944
38.6005	24.0416
96.1665	39.2046
38.5876	49.6488
80.9938	45.5412
102.26	41.0487
61.2209	54.6718
20.0998	62.6498
112.929	37.0135
11.0454	57.5587
66.7308	65.7647
131.229	29.5297
117.924	53.3385
74	68.8767
52.6118	28
128.222	60.0083
116.056	13.6015
63.3482	62.6259
12.0416	91.9239
149.753	33.541
119	59.2115
73.8783	34.7131
48.1664	61.0573
101.513	49.98
51	41.7732
69.7782	146.697
105.646	60.208
96.0052	98.8585
108.227	52.4023
50.3289	43.9659
152.108	62.0081
52.1536	38
108.747	45.1885
120.333	52.8394
33.6155	13.6015
28.0713	66.4078
75.591	104.394
28.2312	50.1199
12.1655	41.6293
85.703	24.6982
54.2033	62.3699
94.1329	47.2969
67.3647	34.8855
33.3766	9.21954
97.1648	35.5106
21.0238	38.833
46.0977	30.8869
68.6586	48.0833
118.296	68.1542
15.6525	52.1536
87.3212	50
49.3963	47.634
114.39	74.7061
40.3113	102.157
75.71	19.2354
42.72	62.2013
94.6256	35.171
85.1587	42.2019
12.6491	35.3412
51.9712	44.5533
47.3814	75.1332
21.0238
154.331
49.7695
40.0125
18.0278
112.33
38.0132
98.3514
63.7887
36.8782
66.4906
29.0689
50.9902
34
41.4849
73.5391
48.4665
19.4165
52.2015
30.5941
67.6757
46.6155
80.0812
87.6185
53.6004
24.0832
47.0106
100.419
50.774
85.8836
30.0167
70.7107
48.8467
70.214
62.514
58.0345
37.855
90.4268
53.8238
70.0071
76.4853
44.5982
26
70.3491
31.257
48.0104
62.5859
81.3204
59.0932
63.5689
93.771
44.4072
66.7308
40.8534
35.5106
115.741
54.5619
88.6172
21.6333
42.72
60.6053
31.0645
89.8109
74.0405
42.45
77.6659
89.1964
29.8329
94.1329
32.9848
67.4759
34.4093
50.4777
62.8172
36.7696
54.148
47.8539
24.5968
66.4831
37.6431
36.0694
41.1461
22.0227
73.0069
85.8429
30.6105
93.0215
42.107
32.8938
50.6063
39.1152
44.1814
20.0998
50
55.7135
17.2047
77.026
64.4748
21.095
