# Supplementary material for: Junction Mapper is a novel computer vision tool to decipher cell–cell contact phenotypes
Source: eLife. 2019 Dec 3;8:e45413. doi: 10.7554/eLife.45413 (PMC7034980; doi:10.7554/eLife.45413)
Supplement: Figure 5—source data 1. [file elife-45413-fig5-data1.xlsx]

## Sheet: Explanation
Source Data 5 complementing Figure 5
Figure 5 Panel B data	B (H-Ras)	interface linearity index, interface occupancy, E-cadherin intensity, E-cadherin intensity per interface area, cluster density
Figure 5 Panel D data	D (Src)	interface linearity index, interface occupancy, E-cadherin intensity, E-cadherin intensity per interface area, cluster density
Figure 5 Panel F data	F (Rac1)	interface linearity index, interface occupancy, E-cadherin intensity, E-cadherin intensity per interface area, cluster density

## Sheet: B (H-Ras)
interface linearity index			interface occupancy			E-cadherin intensity			E-cadherin intensity per interface area			cluster density
control	en	ee	control	en	ee	control	en	ee	control	en	ee	control	en	ee
1.15699	1.12341	1.06241	61.829	26.1236	22.4691	25199	7333	7159	50.0974	20.5983	17.6765	81.0257	78.8495	78.6703
1.09008	1.16957	1.11419	61.9718	24.8	16.3333	12463	7071	4198	58.5117	18.856	13.9933	94.4167	76.0323	85.6735
1.15397	1.09687	1.13926	52.2599	14.2308	12.7072	14160	5270	5201	40	10.1346	9.57827	76.5405	71.2162	75.3768
1.01944	1.21718	1.1501	69.7674	22.1312	29.6407	7693	8926	6852	59.6357	18.291	20.515	85.4778	82.6482	69.2121
1.17213	1.10411	1.20673	58.3685	40.1235	60.8365	38096	20364	12379	53.5809	31.4259	47.0684	91.7976	78.3231	77.3688
1.14612	1.10044	1.22222	26.4852	41.1538	44.127	7643	8767	10404	18.9183	33.7192	33.0286	71.4299	81.9346	74.8489
1.17545	1.14441	1.16672	15.9396	29.0993	1.9943	6234	9951	876	10.4597	22.9815	1.24786	65.6211	78.9762	62.5714
1.04702	1.22565	1.0804	44.3114	24.3671	9.52381	5889	11985	1355	35.2635	18.9636	6.45238	79.5811	77.8247	67.75
1.05797	1.12267	1.17931	28.169	38.8724	19.1693	3008	9641	8202	21.1831	28.6083	13.1022	75.2	73.5954	68.35
1.15219	1.10827	1.23426	26.2136	47.3233	21.8266	7685	18978	9297	18.6529	40.6381	14.3916	71.1574	85.8733	65.9362
1.0547	1.13755	1.27293	26.2799	26.5403	4.811	5266	8557	851	17.9727	20.2772	2.9244	68.3896	76.4018	60.7857
1.09184	1.07754	1.22166	25.7143	31.6239	11.1413	3124	8036	2728	17.8514	22.8946	7.41304	69.4222	72.3964	66.5366
1.04999	1.25435	1.15136	12.3249	40.1447	48.3776	2898	16333	13507	8.11765	29.5353	39.8437	65.8636	73.5721	82.3598
1.0815	1.08286	1.19474	15.4971	10.9091	44.2688	3334	2330	8673	9.74854	10.5909	34.2806	62.9057	97.0833	77.4375
1.09715	1.0654	1.18894	23.4332	38.806	29.053	6059	3904	13376	16.5095	29.1343	21.4703	70.4535	75.0769	73.9005
1.09874	1.22555	1.36744	19.0476	42.8826	36.2761	3357	19757	17227	13.3214	35.1548	27.6517	69.9375	81.9793	76.2257
1.06099	1.20938	1.05462	17.5214	9.58904	9.4697	3211	2785	3080	13.7222	9.53767	5.83333	78.3171	99.4643	61.6
1.08108	1.10458	1.23801	19.0608	36.6391	7.58427	5122	11661	3480	14.1492	32.124	4.88764	74.2319	87.6767	64.4444
1.17986	1.06561	1.25307	7.05882	32.9571	76.9863	1495	10781	22183	4.39706	24.3363	60.7753	62.2917	73.8425	78.9431
1.08881	1.2509	1.34677	21.2435	17.6471	5.04202	5463	13872	1469	14.1529	12.9524	3.08613	66.6219	73.3968	61.2083
1.08106	1.15295	1.12855	27.7966	56.7204	12.5424	5702	17774	3882	19.3288	47.7796	13.1593	69.5366	84.237	104.919
1.20711	1.1774	1.12193	51.0791	47.7528	1.41844	5423	13197	363	39.0144	37.0702	0.858156	76.3803	77.6294	60.5
1.06136	1.24935	1.17549	34.2857	21.5976	4.96454	4033	5589	1838	23.0457	16.5355	3.25887	67.2167	76.5617	65.6429
1.08238	1.13868	1.14492	61.218	57.8067	6.64062	16607	28111	2463	53.2276	52.2509	4.81055	86.9476	90.3891	72.4412
1.10805	1.19882	1.08199	36.4312	62.5984	18.2432	8185	11692	1983	30.4275	46.0315	13.3986	83.5204	73.5346	73.4444
1.16266	1.14973	1.10154	0.198413	47.7064	26.5509	58	9113	7689	0.115079	41.8028	19.0794	58	87.625	71.8598
1.08689	1.07768	1.12575	45.1923	32.2097	72.1915	19103	7307	35258	30.6138	27.367	64.9319	67.7411	84.9651	89.9439
1.12516	1.13737	1.1427	40.8602	65.0284	1.4658	11916	28129	555	32.0323	53.1739	0.903909	78.3947	81.7703	61.6667
1.14582	1.16512	1.26372	65.8959	39.5062	58.5366	27400	11500	27123	52.7938	28.3951	60.1397	80.117	71.875	102.739
1.08161	1.09047	1.18324	9.6	31.4642	2.0155	2248	7398	989	5.99467	23.0467	1.53333	62.4444	73.2475	76.0769
1.05648	1.14616	1.17423	41.4365	33.6601	28.3401	5402	7643	6080	29.8453	24.9771	24.6154	72.0267	74.2039	86.8571
1.21907	1.12281	1.15899	46.8354	15.7754	42.0191	9316	8922	23026	39.308	11.9278	31.4134	83.9279	75.6102	74.7597
1.09565	1.13784	1.14783	35	16.5485	5.88235	12687	4951	2029	28.8341	11.7045	4.77412	82.3831	70.7286	81.16
1.22066	1.15505	1.39294	13.8053	60.7784	10.6832	4996	28017	5847	8.84248	41.9416	7.26335	64.0513	69.0074	67.9884
1.10943	1.16432	1.14751	50	47.3214	14.693	18819	22266	5529	43.9696	39.7607	12.125	87.9393	84.0226	82.5224
1.0948	1.13672	1.15119	57.1014	40.1409	15.3846	15175	4703	3702	43.9855	33.1197	11.8654	77.0305	82.5088	77.125
1.08409	1.08706	1.17469	66.4352	61.9792	28.013	21476	28443	13125	49.713	49.3802	21.3762	74.8293	79.6723	76.3081
1.12231	1.14356	1.14987	40.7843	20	29.5337	8319	3668	16188	32.6235	13.8415	20.9689	79.9904	69.2075	71
1.13617	1.10931	1.18214	53.9162	49.3878	7.4813	21651	36712	1853	39.4372	37.4612	4.62095	73.1453	75.8512	61.7667
1.0819	1.20812	1.15329	48.7713	47.2393	30.186	20623	6447	15388	38.9849	39.5521	22.0143	79.9341	83.7273	72.9289
1.06679	1.12195	1.13458	32.1429	62.0499	0	15074	16466	0	23.4068	45.6122	0	72.8213	73.5089	0
1.13692	1.22283	1.19282	16.6667	10.9023	10.3093	3258	1912	3813	11.3125	7.18797	7.86186	67.875	65.931	76.26
1.1702	1.19566	1.23715	34.4954	3.30882	9.94475	14993	607	4894	27.5101	2.23162	6.75967	79.75	67.4444	67.9722
1.28605	1.11684	1.15099	27.6252	28.0702	22.1093	12409	7723	11725	20.0468	19.3559	14.8984	72.5673	68.9554	67.3851
1.11634	1.17325	1.13807	30.9633	72.2944	35.2273	9555	41374	5170	21.9151	59.7027	29.375	70.7778	82.5828	83.3871
1.08647	1.10471	1.14772	39.292	29.7491	10.3774	15401	11837	1992	27.2584	21.2133	6.26415	69.3739	71.3072	60.3636
1.0878	1.09591	1.43433	44.4618	5.23256	8.51955	20087	656	4469	31.337	3.81395	6.24162	70.4807	72.8889	73.2623
1.08221	1.29076	1.2039	42.6735	35.9206	26.8456	11146	15158	8138	28.653	27.361	18.2058	67.1446	76.1709	67.8167
1.12555	1.37547	1.10611	54.6917	7.27969	14.5374	13976	2751	2490	37.4692	5.27011	10.9692	68.5098	72.3947	75.4545
1.09598	1.2674	1.14057	74.72	23.5398	19.2157	34381	9925	3801	55.0096	17.5664	14.9059	73.621	74.6241	77.5714
1.15929	1.16696	1.13234	86.2069	46.7577	39.501	18068	12458	15766	69.2261	42.5188	32.7775	80.3022	90.9343	82.9789
1.10693	1.15249	1.29528	57.598	38.2696	38.0682	18488	19657	11118	45.3137	32.7071	31.5852	78.6723	85.4652	82.9702
1.14451	1.25822	1.09646	59.5238	19.1759	32.9875	27776	9824	12146	50.8718	15.5689	25.1992	85.4646	81.1901	76.3899
1.07784	1.24394	1.22516	40.8163	8.13008	10.7843	11080	1911	2760	25.1247	5.17886	6.76471	61.5556	63.7	62.7273
1.18506	1.12199	1.12747	25.5814	27.6455	6.38037	5343	13094	3316	15.532	17.3201	4.06871	60.7159	62.6507	63.7692
1.09233	1.19314	1.11379	46.748	11.5288	6.89655	9301	3678	3440	37.8089	9.21805	4.39336	80.8783	79.9565	63.7037
1.1141	1.10176	1.17279	4.08526	11.0795	6.64962	1390	2847	1609	2.46892	8.08807	4.11509	60.4348	73	61.8846
1.12397	1.14796	1.12442	4.74576	12.8906	5.00808	948	5385	1914	3.21356	10.5176	3.09208	67.7143	81.5909	61.7419
1.07143	1.09562	1.31899	57.3991	17.1875	1.30152	19464	5261	912	43.6412	13.7005	0.989154	76.0312	79.7121	76
1.17262	1.09655	1.18093	63.1179	25.3886	2.33645	13772	3479	858	52.365	18.0259	1.33645	82.9638	71	57.2
1.07536	1.38533	1.1026	38.3459	37.9902	0.638978	8502	10671	110	31.9624	26.1544	0.351438	83.3529	68.8452	55
1.07499	1.17605	1.11989	59.7484	16.6154	37.2204	18523	3726	18554	58.2484	11.4646	29.639	97.4895	69	79.6309
1.33097	1.07823	1.13943	64.8649	48.8971	58.6207	22298	11612	5694	50.2207	42.6912	49.0862	77.4236	87.3083	83.7353
1.15062	1.09784	1.24359	64.4776	45.1219	36.7347	20508	9967	16641	61.2179	40.5163	33.9612	94.9444	89.7928	92.45
1.14532	1.04562	1.19865	73.0245	70.3846	24.1322	28881	17256	12077	78.6948	66.3692	19.962	107.765	94.2951	82.7192
1.14384	1.08535	1.16914	36.0526	36.8217	0.925926	9522	7173	326	25.0579	27.8023	0.603704	69.5036	75.5053	65.2
1.09686	1.17396	1.09082	43.4389	26.2338	15.9938	8203	6911	8322	37.1176	17.9506	12.9224	85.4479	68.4257	80.7961
1.07195	1.12333	1.13705	51.5958	30.6849	0.880503	8937	8263	547	47.5372	22.6384	0.68805	92.134	73.7768	78.1429
1.12872	1.20877	1.10098	27.451	51.4139	1.0929	5195	15771	112	20.3726	40.5424	0.612022	74.2143	78.855	56
1.15469	1.07468	1.19188	19.3617	67.4312	34.6626	6258	27697	19701	13.3149	63.5252	30.2163	68.7692	94.2075	87.1726
1.17063	1.13195	1.13556	63.1868	50.7895	25.3968	9583	16686	6832	52.6538	43.9105	18.0741	83.3304	86.456	71.1667
1.14745	1.10795	1.10916	47.2028	42.3948	43.1718	10818	12342	14074	37.8252	39.9417	31	80.1333	94.2137	71.8061
1.13998	1.16222	1.18719	51.0638	49.0683	7.49108	15271	20219	4184	46.4164	41.8613	4.97503	90.8988	85.3122	66.4127
1.125	1.14201	1.1058	66.3121	34.0467	1.08933	14535	14142	310	51.5425	27.5136	0.675381	77.7273	80.8114	62
1.07013	1.1316		47.2313	67.9012		11376	19230		37.0554	79.1358		78.4552	116.545
1.07421	1.07468		38.3523	35.2403		10401	11577		29.5483	26.492		77.0444	75.1753
1.10334	1.14888		37.5	54.1026		8950	16952		27.9688	43.4667		74.5833	80.3412
1.08313	1.12644		52.0661	32.3864		15798	9335		43.5207	26.5199		83.5873	81.886
1.11661	1.13944		77.9747	16.7568		31191	2357		78.9646	12.7405		101.269	76.0323
1.07574	1.27531		72.2222	9.89583		26338	1250		69.6773	6.51042		96.4762	65.7895
1.05923	1.14312		37.0927	8.67052		11455	2918		28.7093	5.62235		77.3987	64.8444
1.13622	1.13724		78.9474	35.1111		18432	7380		88.1914	32.8		111.709	93.4177
1.06181	1.09212		76.7544	34.7015		18717	7652		82.0921	28.5522		106.954	82.2796
1.16951	1.1144		73.8397	15.5172		15947	2433		67.2869	10.4871		91.1257	67.5833
1.0909	1.16131		88.1443	89.1566		15658	40985		80.7113	98.759		91.5673	110.77
1.11844	1.18017		76.25	82.1883		35529	33151		74.0187	84.3537		97.0738	102.635
1.03094	1.18818		77.1242	22.5175		11561	11892		75.5621	16.6322		97.9746	73.8634
1.27591	1.12633		46.8992	37.4593		9249	8931		35.8488	29.0912		76.438	77.6609
1.07566	1.08821		51.7361	57.4468		11773	22188		40.8785	47.2085		79.0134	82.1778
1.1231	1.13377		39.3836	21.4669		8566	8342		29.3356	14.9231		74.4869	69.5167
1.07235	1.06471		56.746	3.62117		12235	1015		48.5516	2.8273		85.5594	78.0769
1.13185	1.11215		62.037	1.08992		21109	233		48.8634	0.634877		78.7649	58.25
1.07529	1.13458		42.7873	1.37255		13267	577		32.4376	1.13137		75.8114	82.4286
1.11841	1.07108		30.9038	12.2807		8204	4140		23.9184	8.07018		77.3962	65.7143
1.18578	1.11976		59.383	0		19900	0		51.1568	0		86.1472	0
1.21216	1.10488		92.7746	0.879765		29508	176		85.2832	0.516129		91.9252	58.6667
1.2342	1.22972		73.4082	15.2797		16460	8134		61.6479	11.0969		83.9796	72.625
1.10927	1.12762		98.0874	55.8952		35090	24705		95.8743	53.941		97.7437	96.5039
1.09535	1.20226		33.0033	34.8315		7072	10803		23.3399	24.2764		70.72	69.6968
1.10426	1.07951		34.5455	40.4494		8952	8509		27.1273	31.8689		78.5263	78.787
1.06285	1.17939		13.6187	40.8027		2316	8877		9.01167	29.689		66.1714	72.7623
1.14643	1.17521		40.1216	38.5433		10444	20345		31.7447	30.8725		79.1212	80.0984
1.15463	1.12038		21.5654	16.3324		20544	3745		17.1058	10.7307		79.3205	65.7018
1.13061	1.18312		37.5912	17.2043		7190	7432		26.2409	11.4163		69.8058	66.3571
1.07986	1.19727		39.7321	65.8947		7283	34186		32.5134	71.9705		81.8315	109.221
1.09911	1.09708		37.1517	58.8119		17816	28163		27.5789	55.7683		74.2333	94.8249
1.06604	1.12266		47.2039	71.7521		23057	68484		37.9227	81.6257		80.338	113.761
1.17205	1.1734		55.8997	39.5652		31160	15377		45.9587	33.4283		82.2164	84.489
1.14792	1.18179		45.8472	60.6105		10361	32694		34.4219	47.5204		75.0797	78.4029
1.06154	1.08896		55.9122	49.2973		27197	36201		45.9409	39.1362		82.1662	79.3882
1.44701	1.15293		16.4931	69.6148		6622	47629		11.4965	67.9444		69.7053	97.6004
1.14339	1.11152		49.9492	42.8571		41603	9334		42.2366	35.0902		84.5589	81.8772
1.13507	1.33258		65.0273	65.8761		21301	46566		58.1995	61.3518		89.5	93.132
1.18093	1.39646		55.2359	25.8197		41402	9186		47.6433	18.8238		86.2542	72.9048
1.144	1.19198		41.847	16.1932		25154	4663		36.2973	13.2472		86.7379	81.807
1.06185	1.12026		56.9686	6.10933		30437	1380		53.0261	4.4373		93.0795	72.6316
1.13772	1.17063		1.31827	24.1758		407	5569		0.766478	30.5989		58.1429	126.568
1.16963	1.16869		41.129	55.1456		7613	28997		30.6976	56.3049		74.6372	102.102
1.11107	1.30572		8.061	0.209644		2442	55		5.32026	0.115304		66	55
1.25149	1.22836		0.346021	13.4715		112	2217		0.193772	11.487		56	85.2692
1.15798	1.28342		71.4549	23.608		36487	8380		67.1952	18.6637		94.0387	79.0566
1.07215	1.2036		67.6409	35.6757		32147	15310		67.1127	27.5856		99.2191	77.3232
1.09974	1.1239		79.8817	0		13161	0		77.8757	0		97.4889	0
1.10561	1.08739		70.765	30.9524		55423	8315		75.7145	24.747		106.994	79.9519
1.10164	1.14318		66.8639	1.38122		10882	356		64.3905	0.983425		96.3009	71.2
1.15677	1.18267		60.4938	1.21457		28127	189		57.8745	0.765182		95.6701	63
1.19204	1.17747		81.5476	20.7692		12333	7969		73.4107	15.325		90.0219	73.787
1.19952	1.12711		64.4377	25		22853	12967		69.462	20.6481		107.797	82.5923
1.07351	1.14094		72.5301	26.8966		27077	13216		65.2458	22.7862		89.9568	84.718
1.12832	1.4317		70.8333	40.5751		13884	22238		64.2778	35.524		90.7451	87.5512
1.111	1.0827		50.9235	16.5493		37043	3715		48.8694	13.081		95.9663	79.0426
1.14819	1.06904		8.54922	5.33981		2147	1415		5.56218	3.43447		65.0606	64.3182
1.18881	1.09803		37.0892	13.8075		12665	2133		29.73	8.92469		80.1582	64.6364
1.17934	1.08325		37.0103	7.43802		30325	1127		31.2629	4.65702		84.4707	62.6111
1.18617	1.17834		42.3729	5.90659		8591	2954		36.4025	4.05769		85.91	68.6977
1.1218	1.09485		48.4127	2.63158		8820	587		35	1.93092		72.2951	73.375
1.14708	1.17048		29.2531	23.4637		10067	6139		20.8859	17.148		71.3972	73.0833
1.18599	1.36483		59.1216	32.2314		17376	16262		58.7027	26.8793		99.2914	83.3949
1.22211	1.14051		69.9822	51.5038		36428	10179		64.7034	38.2669		92.4569	74.2993
1.08367	1.16406		68.432	64.8		70231	7392		72.9294	59.136		106.572	91.2593
1.15091	1.12274		71.1611	1.75439		18962	449		71.0187	1.12531		99.8	64.1429
1.16504	1.17453		27.3616	25.3086		6818	11008		22.2085	22.6502		81.1667	89.4959
1.22308	1.09332		23.5632	9.36768		2743	2498		15.7644	5.85012		66.9024	62.45
1.04961	1.2157		31.3029	53.1531		13104	30760		22.1726	46.1862		70.8324	86.8927
1.16974	1.19167		37.3134	40.3252		8430	17459		31.4552	28.3886		84.3	70.3992
1.13111	1.1003		35.6164	0		17020	0		25.9056	0		72.7351	0
1.21014	1.22562		29.4821	9.60265		5605	2889		22.3307	9.56622		75.7432	99.6207
1.08638	1.09976		40.0602	38.6667		20676	12161		31.1385	27.0244		77.7293	69.8908
1.10251	1.18824		53.7915	37.3563		19499	12179		46.2062	34.9971		85.8987	93.6846
1.25913	1.10747		27.0758	69.2857		5799	9758		20.935	69.7		77.32	100.598
1.22098	1.3149		2.93501	56.7164		1394	5873		2.92243	43.8284		99.5714	77.2763
1.16611	1.09849		55.9524	34.9112		30786	8495		52.3571	25.1331		93.5745	71.9915
1.10862	1.09627		55.7029	53.9474		18763	19152		49.7692	42		89.3476	77.8537
1.12529	1.18688		44.0922	41.1765		13385	6867		38.5735	36.7219		87.4837	89.1818
1.09302	1.23354		67.2237	39.785		54934	17069		70.6093	30.5896		105.036	76.8874
1.07875	1.08681		19.3896	18.0982		8001	4234		14.3644	12.9877		74.0833	71.7627
1.07404	1.1345		2.57732	37.6894		623	14536		1.60567	27.5303		62.3	73.0452
1.16569	1.23057		3.10559	35.5469		592	8169		1.83851	31.9102		59.2	89.7692
1.14952	1.17481		24.5455	49.5261		4103	17673		18.65	41.8792		75.9815	84.5598
1.19367	1.20518		21.1055	11.5861		6309	6941		15.8518	7.80765		75.1071	67.3884
1.09936	1.1967		22.3958	30.7143		7151	3054		18.6224	21.8143		83.1512	71.0233
1.07159	1.151		43.7799	0.824742		14463	231		34.6005	0.476289		79.0328	57.75
1.26674	1.09423		33.2461	33.7156		18347	11342		24.0144	26.0138		72.2323	77.1565
1.1829	1.15701		46.7422	28.2392		12940	11588		36.6572	19.2492		78.4242	68.1647
1.11496	1.14762		47.6191	23.8095		8870	6351		38.3983	15.9173		80.6364	66.8526
1.25066	1.18206		27.4678	14.9351		9327	2828		20.015	9.18182		72.8672	61.4783
1.12168	1.14831		60.9325	31.5254		30427	7410		48.918	25.1186		80.2823	79.6774
1.1112	1.19873		68.932	20.7858		17008	11875		55.0421	15.0507		79.8498	72.4085
1.13193	1.16315		60.7595	60.6414		21693	17802		45.7658	51.9009		75.3229	85.5865
1.09974	1.1083		69.0722	11.1963		5414	4828		55.8144	7.40491		80.806	66.137
1.11199	1.08094		36.8852	40.6452		6651	9862		27.2582	31.8129		73.9	78.2698
1.10585	1.18943		48.0556	28.1304		14512	12355		40.3111	21.1921		83.8844	75.3354
1.05556	1.1684		64.7727	57.5836		19185	18634		54.5028	47.9023		84.1447	83.1875
1.05939	1.22304		34.7458	55.4794		8553	7895		24.161	54.0753		69.5366	97.4691
1.18818	1.1384		57.7406	39.0071		12270	8681		51.3389	30.7837		88.913	78.9182
1.13425	1.15525		41.0853	38.4615		20394	4271		31.6186	29.8671		76.9585	77.6546
1.09229	1.07622		25.9615	44.4056		5307	9960		17.0096	34.8252		65.5185	78.4252
1.10072	1.14666		25	34.7985		6693	7164		16.5668	26.2418		66.2673	75.4105
1.19487	1.10805		51.3636	48.0818		8780	13948		39.9091	35.6726		77.6991	74.1915
1.13687	1.10284		68.1529	9.47955		9120	3798		58.0892	7.05948		85.2336	74.4706
1.10343	1.11214		56.582	49.7336		19690	21544		45.4734	38.2664		80.3674	76.9429
1.21955	1.10349		17.3077	29.4444		2414	4607		15.4744	25.5944		89.4074	86.9245
1.15643	1.06972		44.4444	68.6813		10666	19871		35.9125	54.5907		80.803	79.484
1.1193	1.13977		16.8929	55.3947		7923	33665		11.9502	44.2961		70.7411	79.9644
1.11331	1.06875		24.0909	56		3937	8023		17.8955	53.4867		74.283	95.5119
1.09354	1.13803		27.9412	62.6717		6664	43231		19.6	53.9713		70.1474	86.1175
1.09803	1.20521		13.8075	56.3025		2028	11389		8.48536	47.8529		61.4545	84.9925
1.12853	1.15276		16.8639	35.3519		3990	16155		11.8047	26.4403		70	74.7917
1.10072	1.45723		81.5436	26.8085		25049	4546		84.057	19.3447		103.082	72.1587
1.14666	1.17097		51.1719	0.421053		9932	237		38.7969	0.249474		75.8168	59.25
1.12651	1.13522		38.7417	0		9276	0		30.7152	0		79.282	0
1.1364	1.0995		55.1282	33.7531		7405	9578		47.468	24.1259		86.1047	71.4776
1.09797	1.18459		77.7778	32.823		24119	30869		72.4294	29.5397		93.1235	89.9971
1.17534	1.16249		64.9635	57.7855		27983	14679		51.0639	50.7924		78.6039	87.8982
1.25741	1.13697		50.6667	7.5188		16115	1313		42.9733	4.93609		84.8158	65.65
1.0979	1.1227		44.1606	2.97872		8939	898		32.6241	1.91064		73.876	64.1429
1.10741	1.21382		65.7718	16.2		16920	5453		56.7785	10.906		86.3265	67.321
1.11242	1.05913		34.2629	52.3385		6193	17962		24.6733	40.0045		72.0116	76.434
1.04371	1.1908		41.2429	10.7095		6135	4756		34.661	6.3668		84.0411	59.45
1.17316	2.02167		73.7864	44.8276		23731	6726		57.5995	33.133		78.0625	73.9121
1.14067	1.16803		62.2356	41.791		18661	9020		56.3776	33.6567		90.5874	80.5357
1.09933	1.1153		58.8235	40.0455		11735	25567		49.3067	29.0865		83.8214	72.6335
1.11917	1.31953		70.0651	16.2455		28697	3211		62.2495	11.5921		88.8452	71.3555
1.27402	1.11514		53.9171	18.6795		8974	17854		41.3548	14.3752		76.7009	76.9569
1.13004	1.11519		47.2924	31.8339		9958	15143		35.9495	26.199		76.0153	82.2989
1.08284	1.09529		46.6926	33.9755		10103	14468		39.3113	25.338		84.1917	74.5773
1.10656	1.05921		53.5211	23.2558		6415	5477		45.1761	18.196		84.4079	78.2429
1.09492	1.31054		37.2168	6.51685		8243	1853		26.6764	4.16404		71.6783	63.8965
1.16064	1.10194		37.8378	11.3707		8958	5347		26.9009	8.32866		71.0952	73.2466
1.20138	1.19118		27.7778	32.0988		5309	17594		21.0675	24.1344		75.8429	75.188
1.09314	1.20346		25.2285	17.1681		9274	6714		16.9543	11.8832		67.2029	69.2165
1.14638	1.18082		24.1177	1.79171		2662	1258		15.6588	1.40874		64.9268	78.625
1.1015	1.08434		35.461	7.12074		6859	1677		24.3227	5.19195		68.59	72.913
1.06957	1.2442		26.0163	10.9027		4399	7503		17.8821	8.79601		68.7344	80.6774
1.19731	1.24225		39.2936	37.7637		13633	14034		30.0949	29.6076		76.5899	78.4022
1.16693	1.28953		33.6111	14.6623		8284	5442		23.0111	8.9654		68.4628	61.1461
1.0876	1.23759		45.977	22.6415		11059	11192		31.7787	16.2438		69.1188	71.7436
1.0523	1.16872		63.8889	6.65742		25956	3115		51.5	4.32039		80.6087	64.8958
1.14558	1.16816		52.4753	26.3636		38989	5343		42.8922	24.2864		81.7379	92.1207
1.17842	1.36641		49.1304	5.72597		9692	3954		42.1391	4.04294		85.7699	70.6071
1.21288	1.19315		33.9161	10.6354		19909	4753		23.204	6.56492		68.4158	61.7273
1.09403	1.13676		41.3333	1.11524		10480	368		27.9467	0.684015		67.6129	61.3333
1.1014	1.11173		24.6106	32.3651		5203	5649		16.2087	23.4398		65.8608	72.4231
1.12259	1.12455		53.2847	12.766		5347	2004		39.0292	8.52766		73.2466	66.8
1.37584	1.05904		13.468	52.1277		2652	17655		8.92929	46.9548		66.3	90.0765
1.12259	1.17735		20	25.3125		1485	14831		14.85	23.1734		74.25	91.5494
1.06549	1.13433		43.3921	53.2995		13782	11295		30.3568	57.335		69.9594	107.571
1.09606	1.12801		60.4982	27.4306		13273	6721		47.2349	23.3368		78.0765	85.076
1.0995	1.13349		56.7775	9.23379		20698	3423		52.9361	6.72495		93.2342	72.8298
1.09901	1.22268		59.6125	3.57143		34083	919		50.7943	2.34439		85.2075	65.6429
1.07449	1.09695		63.961	13.5802		18471	4461		59.9708	9.17901		93.7614	67.5909
1.08238	1.09572		68.9655	58.6207		12867	11020		55.4612	63.3333		80.4188	108.039
1.19497	1.21108		13.2048	63.3911		5941	31584		8.81454	60.8555		66.7528	96
1.14531	1.10262		12.2807	38.8736		1786	25028		7.83333	34.3791		63.7857	88.4382
1.09282	1.0226		0	69.2982		0	9760		0	85.614		0	123.544
1.14711	1.22782		0.252525	36.6197		56	10066		0.141414	28.3549		56	77.4308
1.22735	1.11693		56.6406	31.07		11665	12642		45.5664	26.0124		80.4483	83.7219
1.0879	1.14804		15.6909	36.9231		4603	16162		10.7799	31.0808		68.7015	84.1771
1.11014	1.07629		15.2406	32.5397		4128	9615		11.0374	25.4365		72.421	78.1707
1.16871	1.16047		28.125	64.6067		6245	12119		21.684	68.0843		77.0988	105.383
1.18526	1.14889		30.1802	34.629		14434	8482		21.6727	29.9717		71.8109	86.551
1.11543	1.15379		8.42491	60.6936		1478	20964		5.41392	60.5896		64.2609	99.8286
1.096	1.05178		50.867	52.8777		20187	14252		38.8959	51.2662		76.4659	96.9524
1.09734	1.23162		71.1948	27.4247		37111	7546		60.7381	25.2375		85.3126	92.0244
1.16554	1.11911		59.5349	31.0705		19268	8635		44.8093	22.5457		75.2656	72.563
1.03625	1.11912		39.0977	17.4641		3341	5207		25.1203	12.4569		64.25	71.3288
1.12748	1.22153		41.0641	31.5412		21315	7117		29.0791	25.509		70.814	80.875
1.03339	1.16475		91.6667	24.4216		8072	8084		96.0952	20.7815		104.831	85.0947
1.56081	1.18254		43.3007	28.0172		18034	9195		29.4673	19.8168		68.0528	70.7308
1.08727	1.11652		76.1072	51.1737		76538	10313		89.2051	48.4178		117.21	94.6147
1.22647	1.13987		56.0146	17.5287		43055	4431		52.3147	12.7328		93.3948	72.6393
1.15481	1.14011		67.3511	60.1732		25366	24330		52.0862	52.6623		77.3354	87.518
1.25256	1.05917		48.3696	45.3039		12029	6936		32.6875	38.3204		67.5786	84.5854
1.15042	1.15053		76.1905	37.9653		56859	12250		64.466	30.397		84.6116	80.0654
1.17109	1.22464		42.8198	16.3793		23387	1438		30.5313	12.3965		71.3018	75.6842
1.19001	1.0965		40.7494	10.4167		13597	3485		31.8431	8.06713		78.1437	77.4444
1.03094	1.17315		77.5281	24.4766		5816	12402		65.3483	19.971		84.2899	81.5921
1.11458	1.14229		32.6509	25.8621		25441	5220		27.4149	22.5		83.9637	87
1.23107	1.25456		87.4543	25.1152		59946	8272		73.0158	19.0599		83.4903	75.8899
1.1302	1.36214		47.2549	19.5312		18006	5017		35.3059	19.5977		74.7137	100.34
1.11694	1.12631		41.433	50.1193		11227	17889		34.9751	42.6945		84.4135	85.1857
1.09188	1.09299		57.1205	29.1793		30394	10383		47.565	31.5593		83.2712	108.156
1.14619	1.13193		87.2159	19		26628	6236		75.6477	20.7867		86.7361	109.403
1.08934	1.15502		73.7527	20.0611		27282	15796		59.18	16.0855		80.2412	80.1827
1.07769	1.10141		34.9296	52.957		18720	18082		26.3662	48.6075		75.4839	91.7868
1.14128	1.12755		62.9284	59.2868		30669	39628		47.771	58.8826		75.9134	99.3183
1.27784	1.21557		3.46535	14.0958		1785	4290		2.20916	11.4096		63.75	80.9434
1.11974	1.23859		69.5775	52.8701		20467	15590		57.6535	47.0997		82.8624	89.0857
1.16699	1.14244		53.0888	14.5786		39163	4517		37.8021	10.2893		71.2054	70.5781
1.05129	1.0436		63.6964	19.9134		15397	3443		50.8152	14.9048		79.7772	74.8478
1.08177	1.27147		76.1429	58.5014		41703	19416		59.5757	55.9539		78.242	95.6453
1.09681	1.15198		50.2618	11.2022		30944	3026		40.5026	8.26776		80.5833	73.8049
1.17673	1.12066		38.5246	36.4486		7065	3702		28.9549	34.5981		75.1596	94.9231
1.08599	1.12377		44.9736	27.7389		6877	8439		36.3862	19.6713		80.9059	70.916
1.10913	1.16248		50.3968	5.8997		22759	2543		45.1568	3.75074		89.6024	63.575
1.08236	1.25924		60.3015	9.39948		11957	3017		60.0854	7.87728		99.6417	83.8056
1.05449	1.15233		24.7312	28.8194		2031	5816		21.8387	20.1944		88.3043	70.0723
1.2483	1.12962		33.8359	42.6966		15735	7297		26.3568	40.9944		77.896	96.0132
1.14275	1.11911		25.7218	70.1005		7511	26802		19.7139	67.3417		76.6429	96.0645
1.08326	1.06891		44.8029	46.4883		19029	9928		34.1022	33.204		76.116	71.4245
1.20558	1.15272		18.2609	50.9804		5688	9457		12.3652	37.0863		67.7143	72.7462
1.16033	1.06604		31.9149	69.2308		5561	4045		23.6638	51.859		74.1467	74.9074
1.11267	1.11876		27.0315	42.437		11898	8309		19.7313	34.9118		72.9939	82.2673
1.10892	1.1643		55.414	50		7034	10388		44.8025	37.1		80.8506	74.2
1.21339	1.178		17.5227	26.7241		4007	4669		12.1057	20.125		69.0862	75.3064
1.09547	1.07728		49.4173	53.3762		18335	12317		42.7389	39.6045		86.4858	74.1988
1.45503	1.09246		2.24719	61.5566		1378	16975		1.40756	40.0354		62.6364	65.0383
1.22937	1.14659		77.1654	39.886		7661	9510		60.3228	27.094		78.1735	67.9286
1.13307	1.15397		17.9212	12.4294		6905	3034		12.3745	8.57062		69.05	68.9545
1.11776	1.1852		42.4242	34.5029		12057	8562		36.5364	25.0351		86.1214	72.5593
1.14206	1.12457		5.35948	25.1497		2606	9543		3.40654	19.0479		63.561	75.7381
1.0943	1.1387		49.6528	12.1123		13568	5701		47.1111	8.42098		94.8811	69.5244
1.14608	1.16895		37.1316	11.4094		15104	1320		29.6739	8.85906		79.9153	77.6471
1.1754	1.17266		31.1258	4.81651		7160	1293		23.7086	2.9656		76.1702	61.5714
1.1783	1.09625		40.4615	24.5763		19431	4257		29.8939	18.0381		73.8821	73.3966
1.22056	1.13669		32.1489	16.6078		14758	3039		24.9712	10.7385		77.6737	64.6596
1.23778	1.13099		46.8469	27.0161		4861	4821		43.7928	19.4395		93.4808	71.9552
1.20834	1.16103		22.4044	36.2126		5962	8584		16.2896	28.5183		72.7073	78.7523
1.09261	1.20717		25.7485	5.39499		5909	2073		17.6916	3.99422		68.7093	74.0357
1.19251			65			8012			50.075			77.0385
1.32579			11.7086			9475			8.21769			70.1852
1.10593			49.2493			12119			36.3934			73.8963
1.03074			42.616			7119			30.038			70.4852
1.20525			44.2953			6101			40.9463			92.4394
1.17101			16.2197			8510			10.8684			67.0079
1.15672			17.9775			3639			13.6292			75.8125
1.16766			30.3951			14649			22.2629			73.245
1.08773			57.6826			21808			54.932			95.2314
1.25778			82.9787			25048			88.8227			107.043
1.10734			59.5238			27219			64.8071			108.876
1.14012			3.33333			693			3.3			99
1.0733			20.8861			7901			25.0032			119.712
1.02437			90.1478			21914			107.951			119.749
1.09401			76.8953			23058			83.2419			108.254
1.11755			52.0492			22594			46.2992			88.9528
1.13066			64.7239			22093			67.7699			104.706
1.14922			75.6579			11351			74.6776			98.7044
1.10394			45.6395			13418			39.0058			85.465
1.06181			81.407			20411			102.568			125.994
1.08034			62.5866			27011			62.3811			99.6716
1.11793			69.5122			22239			67.8018			97.5395
1.07532			57.6305			27544			55.3092			95.9721
1.1297			33.389			16476			27.5058			82.38
1.15881			29.8942			10152			26.8571			89.8407
1.03094			47.0588			7902			51.6471			109.75
1.11218			60.6154			18788			57.8092			95.3706
1.16224			43.9545			27040			38.4637			87.5081
1.15945			40.7303			13134			36.8933			90.5793
1.11194			43.5088			20747			36.3982			83.6573
1.07318			82.7907			17361			80.7488			97.5337
1.06024			60.095			20869			49.5701			82.4862
1.16426			50.8721			17906			52.0523			102.32
1.08645			69.4382			32121			72.182			103.951
1.09391			58.6735			21406			54.6071			93.0696
1.05651			44.6686			13280			38.2709			85.6774
1.16796			31.9703			6596			24.5205			76.6977
1.17504			57.2816			30118			48.7346			85.0791
1.15851			8.37696			3378			8.84293			105.562
1.25026			22.6453			8721			17.4769			77.177
1.06181			52.1739			20347			44.2326			84.7792
1.08424			40.3175			10598			33.6444			83.4488
1.23624			32.1608			7498			37.6784			117.156
1.08336			54.3982			22984			53.2037			97.8042
1.09779			51.1962			9389			44.9235			87.7477
1.15151			51.1765			14727			43.3147			84.6379
1.16706			30.3317			10267			24.3294			80.2109
1.12849			40.7129			18421			34.561			84.8894
1.16545			48.5222			16220			39.9507			82.335
1.11755			77.724			33152			80.2712			103.277
1.18203			29.6178			15394			24.5127			82.7634
1.0973			57.3427			13812			48.2937			84.2195
1.12667			54.0839			21197			46.7925			86.5184
1.1312			0			0			0			0
1.2849			47.3118			11005			39.4444			83.3712
1.1075			53.2486			34736			49.0622			92.1379
1.13839			57.0667			21155			56.4133			98.8551
1.16598			16.4764			7468			12.1827			73.9406
1.67067			11.5556			2627			11.6756			101.038
1.47569			50.9434			18543			49.9811			98.1111
1.14555			75.1163			27623			64.2395			85.5201
1.15793			76.3158			13575			59.5395			78.0172
1.20187			74.1407			35669			58.3781			78.7395
1.13508			58.7866			25511			53.3703			90.7865
1.33635			33.4356			10521			32.273			96.5229
1.26106			64.1473			28251			54.75			85.3505
1.20699			29.6774			14365			23.1694			78.0707
1.06927			48.9899			7625			38.5101			78.6082
1.07962			36.7383			14570			26.1111			71.0732
1.12084			66.5236			12819			55.0172			82.7032
1.14238			36.0759			11975			25.2637			70.0292
1.12259			17.6707			2926			11.751			66.5
1.11984			23.2955			5937			16.8665			72.4024
1.10568			37.2839			11139			27.5037			73.7682
1.11425			45.4545			8920			35.2569			77.5652
1.04317			41.6928			10874			34.0878			81.7594
1.11916			47.5728			10576			34.2265			71.9456
1.15112			21.978			3106			17.0659			77.65
1.19308			36.9892			13363			28.7376			77.6919
1.09295			84.4			16893			67.572			80.0616
1.13785			34.6008			7241			27.5323			79.5714
1.15162			48.7805			11475			39.9826			81.9643
1.11505			40.8284			5252			31.0769			76.1159
1.10106			48.2301			16330			36.1283			74.9083
1.04808			28.7149			9756			19.5904			68.2238
1.15597			40.0881			6061			26.7004			66.6044
1.09818			31.4239			14004			22.9198			72.9375
1.1474			63.9286			12672			45.2571			70.7933
1.08095			66.0714			12851			57.3705			86.8311
1.0673			61.8234			18782			53.51			86.553
1.10734			85.8268			18184			71.5905			83.4128
1.05215			50.3731			9867			36.8172			73.0889
1.14783			52.6667			5530			36.8667			70
1.13054			29.5455			7353			20.8892			70.7019
1.17486			29.2746			7431			19.2513			65.7611
1.15664			84.058			9475			68.6594			81.681
1.05344			28.125			8993			20.0737			71.373
1.10938			19.2037			5942			13.9157			72.4634
1.18035			24.2236			2935			18.2298			75.2564

## Sheet: D (Src)
interface linearity index			interface occupancy			E-cadherin intensity			E-cadherin intensity per interface area			cluster density
control	en	ee	control	en	ee	control	en	ee	control	en	ee	control	en	ee
1.11759	1.31371	1.17786	90.625	77.8261	44.5378	15296	14371	9968	68.2857	62.4826	27.9216	75.3498	80.2849	62.6918
1.09263	1.06754	1.18998	94.695	85.1351	84.6154	32920	18219	16340	87.3209	61.5507	57.1329	92.2129	72.2976	67.5207
1.11978	1.23877	1.10608	91.4747	37.6033	42.8144	33540	17950	8755	77.2811	24.7245	26.2126	84.4836	65.7509	61.2238
1.12259	1.15452	1.19514	77.2853	98.4	78.3654	20867	10566	11370	57.8033	84.528	54.6635	74.7921	85.9024	69.7546
1.10128	1.05797	1.17149	94.086	98.6755	62.7329	32345	12297	13301	86.9489	81.4371	41.3075	92.4143	82.5302	65.8465
1.0717	1.18653	1.13414	84.4086	90.9502	92.7007	27038	17803	8936	72.6828	80.5566	65.2263	86.1083	88.5721	70.3622
1.09634	1.16569	1.18524	87.8307	90.4459	90.8629	29748	10631	13115	78.6984	67.7134	66.5736	89.6024	74.8662	73.2682
1.14184	1.18643	1.16099	88.1612	57.3222	70.9544	28399	17951	12845	71.534	37.5544	53.2988	81.14	65.5146	75.117
1.09881	1.22099	1.10315	98.7125	44.7005	33.995	18461	6221	8910	79.2318	28.6682	22.1092	80.2652	64.134	65.0365
1.08237	1.16945	1.11066	84.0491	48.7365	8.62745	21692	9133	1306	66.5399	32.9711	5.12157	79.1679	67.6519	59.3636
1.08224	1.08307	1.05917	87.5339	74.2794	13.5593	22269	23923	3659	60.3496	53.0444	8.85956	68.9443	71.4119	65.3393
1.12595	1.19826	1.13088	91.3669	73.8095	24.4132	19349	11860	3623	69.6007	56.4762	17.0094	76.1772	76.5161	69.6731
1.09242	1.09237	1.24045	98.1982	83.3333	18.4524	18545	23688	5632	83.536	56.4	11.1746	85.0688	67.68	60.5591
1.12682	1.19052	1.17884	99.0741	58.1756	25.8454	26514	21319	13914	81.8333	36.6936	16.8043	82.5981	63.074	65.0187
1.0769	1.14787	1.19351	88.3268	69.2029	63.6667	16802	25311	27465	65.3774	45.8533	45.775	74.0176	66.2592	71.8979
1.10816	1.18998	1.17591	84.375	99.654	39.2123	27338	23217	15504	65.7164	80.3356	26.548	77.886	80.6146	67.7031
1.17122	1.19916	1.11737	36.0335	80.1566	26.9287	8802	25055	11080	24.5866	65.4178	16.1281	68.2326	81.6124	59.8919
1.09241	1.15782	1.0612	52.0958	65.8451	40.0491	11703	12610	9865	35.0389	44.4014	24.2383	67.2586	67.4331	60.5215
1.25691	1.20911	1.15671	28.3925	74.3961	40	9010	11691	16792	18.81	56.4783	27.9867	66.25	75.9156	69.9667
1.13323	1.11465		68.4044	63.0137		28629	13093		45.2275	44.839		66.1178		91.1736
1.08463	1.1999	1.15517	89.0667	66.2379	92.6121	25968	16170	25735	69.248	51.9936	67.9024	77.7485	78.4951	73.3191
1.11354	1.22726	1.16112	73.1061	82.6923	11.2882	13830	18074	6904	52.3864	69.5154	9.16866	71.658	84.0651	81.2235
1.18043	1.15986	1.11069	70.5742	78.6325	82.0276	21597	6155	12294	51.6675	52.6068	56.6544	73.2102	66.9022	69.0674
1.16945	1.1275	1.17963	77.1552	84.3648	65.2582	12301	21154	20516	53.0215	68.9055	48.1596	68.7207	81.6757	73.7986
1.17776	1.14985	1.08891	94.4186	58.7361	47.2973	29298	10403	12504	68.1349	38.6729	33.7946	72.1626	65.8418	71.4514
1.13221	1.48737	1.20911	87.8963	77.3756	40.4255	21371	12361	10537	61.5879	55.9321	32.0274	70.0689	72.2866	79.2256
1.09584	1.18048	1.13433	97.1631	87.9888	51.9164	19820	23572	9552	70.2837	65.8436	33.2822	72.3358	74.8317	64.1074
1.13764	1.06181	1.11905	78.1437	83.9286	92.7152	17681	7708	10181	52.9371	68.8214	67.4238	67.7433	82	72.7214
1.20767	1.09853	1.14898	25.4658	40.5263	72.9167	12628	5920	29434	15.687	31.1579	47.1699	61.6	76.8831	64.6901
1.10733	1.23541	1.12318	35.0825	40.5405	70.4301	15075	9607	8089	22.6012	28.8498	43.4892	64.4231	71.163	61.7481
1.16569	1.11646	1.15003	42.0213	82.0388	56.9892	5390	12948	12901	28.6702	62.8544	34.6801	68.2278	76.6154	60.8538
1.08239	1.13383	1.10655	32.3809	61.2195	70.7921	2257	18895	9219	21.4952	46.0854	45.6386	66.3824	75.2789	64.4685
1.2413	1.23467	1.09534	44.5652	43.8356	84.1667	5467	10928	12862	29.712	29.9397	53.5917	66.6707	68.3	63.6733
1.08397	1.1101	1.06388	50.3215	47.1264	69.1176	20623	5555	5825	33.1559	31.9253	42.8309	65.8882	67.7439	61.9681
1.15873	1.12009	1.2035	34.0517	58.7744	75	5409	14531	10570	23.3147	40.4763	45.5603	68.4684	68.8673	60.7471
1.18298	1.14516	1.1144	41.9476	30.5215	69.3966	7554	13978	10138	28.2921	21.4386	43.6983	67.4464	70.2412	62.9689
1.12605	1.10144	1.07036	46.4387	46.4135	67.0968	10336	7257	13338	29.4473	30.6202	43.0258	63.411	65.9727	64.125
1.22867	1.05027	1.13444	50.8265	50.4504	98.062	8126	11142	33804	33.5785	33.4595	65.5116	66.065	66.3214	66.8063
1.05449	1.12724	1.1559	81.8898	70.6897	98.5714	7146	9236	19178	56.2677	53.0805	68.4929	68.7115	75.0894	69.4855
1.11152	1.11434	1.1135	43	79.4521	89	8582	9680	27560	28.6067	66.3014	55.12	66.5271	83.4483	61.9326
1.16957	1.22431	1.16732	20.5	61.4992	46.1538	2646	23811	17711	13.23	40.5639	26.7134	64.5366	65.9584	57.8791
1.1065	1.10824	1.13989	20.2091	66.6667	43.7288	7122	8730	7486	12.4077	45.4688	25.3763	61.3965	68.2031	58.031
1.08375	1.07484	1.11592	30.9702	57.563	59.0147	10676	9462	34593	19.9179	39.7563	36.261	64.3133	69.0657	61.444
1.13622	1.27061	1.09933	24.8804	73.5967	94.359	3367	27183	11651	16.1101	56.5135	59.7487	64.75	76.7881	63.3207
1.10448	1.1317	1.13154	29.6717	45.1219	49.2064	14807	11495	15027	18.6957	35.0457	29.8155	63.0085	77.6689	60.5927
1.07685	1.23822	1.10655	35.6322	65.5512	60.5809	2066	23642	8634	23.7471	46.5394	35.8257	66.6452	70.997	59.137
1.14973	1.06459	1.21047	66.9725	88.785	30.5263	11779	7225	13387	54.0321	67.5234	17.6145	80.6781	76.0526	57.7026
1.11538	1.09452	1.1795	55.9387	90.4762	67.9104	11052	23096	16102	42.3448	78.5578	40.0547	75.6986	86.8271	58.9817
1.09221	1.01944	1.19544	44.8276	65.1163	54.0022	10766	5636	28940	30.9368	43.6899	32.6268	69.0128	67.0952	60.4175
1.24346	1.11465	1.15925	57.4468	88.67	62.9344	14332	13489	9926	43.5623	66.4483	38.3243	75.8307	74.9389	60.8957
1.11824	1.17192	1.15917	66.4783	13.2075	56.7627	28329	2758	16153	53.3503	8.67296	35.816	80.2521	65.6667	63.0977
1.1098	1.41221	1.11415	62.9179	2.91262	70.2811	15900	639	10952	48.3283	2.06796	43.9839	76.8116	71	62.5829
1.16389	1.2518	1.2122	63.4078	12.9032	39.1753	17263	4678	11798	48.2207	7.94228	24.3258	76.0485	61.5526	62.0947
1.11345	1.14582		69.0377	26.6316		24711	16213		51.6966	17.0663		74.8818	64.083
1.16873	1.13959		62.6374	38.6243		12657	13790		46.3626	24.321		74.0175	62.968
1.1133	1.11511		41.129	34.438		7573	16036		30.5363	23.1066		74.2451	67.0962
1.09121	1.11211		75.8621	46.696		11093	13496		54.6453	29.7269		72.0325	63.6604
1.10948	1.10237		77.707	23.8579		18499	3167		58.914	16.0761		75.8156	67.383
1.08017	1.14355		60.9836	56.654		11502	10345		37.7115	39.3346		61.8387	69.4295
1.09195	1.1342		71.6837	41.8919		20102	16504		51.2806	27.8784		71.5374	66.5484
1.08198	1.14698		75.7085	49.8762		13097	27357		53.0243	33.8577		70.0374	67.8834
1.25589	1.24186		76.7857	78.8991		13771	23418		61.4777	71.6147		80.064	90.7674
1.05048	1.09752		60.9756	71.7857		17067	14636		46.252	52.2714		75.8533	72.8159
1.11733	1.08631		45.6376	56.8282		9926	10724		33.3087	47.2423		72.9853	83.1318
1.22219	1.03675		51.3274	77.4603		11379	19733		33.5664	62.6444		65.3966	80.873
1.14956	1.07137		86.9388	75.1412		15472	10955		63.151	61.8927		72.6385	82.3684
1.08758	1.05196		79.9257	67.2727		15701	19889		58.368	51.6597		73.0279	76.7915
1.15168	1.03833		81.1111	84.264		18356	13802		67.9852	70.0609		83.8174	83.1446
1.12141	1.15269		65.3846	78.5992		17628	16409		48.4286	63.8483		74.0672	81.2327
1.07125	1.11418		61.2591	60.8421		19764	21540		47.8547	45.3474		78.1186	74.5329
1.10033	1.12121		79.1075	64.0678		29930	15434		60.7099	52.3186		76.7436	81.6614
1.12936	1.13413		77.0642	56.9106		21004	28641		64.2324	46.5707		83.3492	81.8314
1.33841	1.12995		59.1703	56.2396		21210	24347		46.31	40.5108		78.2657	72.0326
1.05136	1.15022		64.2857	57.3298		6011	15329		61.3367	40.1283		95.4127	69.9954
1.06517	1.104		55.625	43.254		7324	8147		45.775	32.3294		82.2921	74.7431
1.12526	1.07407		58.6331	91.8301		11964	25202		43.036	82.3595		73.3988	89.6868
1.10146	1.22154		58	45.4936		15128	7267		43.2229	31.1888		74.5222	68.5566
1.08766	1.20724		52.2491	71.8978		11085	14253		38.3564	52.0183		73.4106	72.3503
1.09347	1.11823		16.7513	89.521		4740	24351		12.0305	72.9072		71.8182	81.4415
1.16974	1.14297		59.7786	82.3529		12630	15681		46.6052	57.6507		77.963	70.0045
1.20021	1.1721		38.5965	67.364		9714	10695		28.4035	44.749		73.5909	66.4286
1.12395	1.10672		66.3507	90.0929		20756	21215		49.1848	65.6811		74.1286	72.9038
1.1145	1.23405		65.5914	40.6852		14903	12352		53.4158	26.4497		81.4372	65.0105
1.11096	1.14757		48.4444	43.4316		15681	11527		34.8467	30.9035		71.9312	71.1543
1.10559	1.19053		32.5967	65.0075		4263	28770		23.5525	43.3937		72.2542	66.7517
1.15507	1.08818		72.7273	59.736		23216	13934		58.6263	45.9868		80.6111	76.9834
1.1053	1.24249		44.0341	59.5628		10983	9045		31.2017	49.4262		70.8581	82.9817
1.07513	1.09505		51.1765	38.7597		7015	7727		41.2647	29.9496		80.6322	77.27
1.07597	1.07708		58.4383	79.7945		17018	18319		42.8665	62.7363		73.3534	78.6223
1.09509	1.18926		56.8	75.4386		11233	31854		44.932	62.0936		79.1056	82.3101
1.0872	1.14413		70.0565	69.9552		18665	21992		52.726	49.3094		75.2621	70.4872
1.11868	1.07791		65.2542	73.1148		6030	17666		51.1017	57.9213		78.3117	79.2197
1.11905	1.16507		98.7593	56.391		41447	16265		102.846	40.7644		104.138	72.2889
1.16698	1.15898		98.6047	60.7573		20505	25341		95.3721	43.6162		96.7217	71.7875
1.11778	1.18319		99.7653	60.2662		42716	22546		100.272	42.8631		100.508	71.123
1.13834	1.16211		100	66.1997		18007	26062		97.8641	45.6427		97.8641	68.9471
1.09119	1.20755		95.8537	71.6505		42384	28366		103.376	55.0796		107.847	76.8726
1.13659	1.09084		94.6429	70.7317		28911	13818		73.7525	56.1707		77.9272	79.4138
1.14108	1.16312		36.129	76.1644		3870	25160		24.9677	68.9315		69.1071	90.5036
1.25906	1.09184		48.3333	77.7143		5753	8701		31.9611	49.72		66.1264	63.9779
1.11495	1.05086		57.5563	96.8153		25105	10464		40.3617	66.6497		70.1257	68.8421
1.15782	1.11675		63.3803	83.6257		12773	19106		44.9753	55.8655		70.9611	66.8042
1.1512	1.22582		54.7115	64.3885		40592	11515		39.0308	41.4209		71.3392	64.3296
1.07929	1.04365		57.6642	89.3805		15501	7562		37.7153	66.9204		65.4051	74.8713
1.13575	1.12274		61.413	75.1799		15842	14515		43.0489	52.2122		70.0973	69.4498
1.04295	1.02389		60.5839	96.3731		17060	13555		41.5085	70.2332		68.514	72.8763
1.17968	1.09444		75.2225	99.3443		33783	20953		50.1232	68.6984		66.6331	69.1518
1.06949	1.10728		70.9413	98.7629		36274	32158		49.487	66.3051		69.7577	67.1357
1.08083	1.11452		75.5274	78.4483		26386	22438		55.6667	48.3578		73.7039	61.6429
1.16497	1.09773		59.1195	53.5176		39257	12788		41.1499	32.1307		69.6046	60.0376
1.07107	1.17097		61.1487	91.5361		13182	18581		44.5338	58.2477		72.8287	63.6336
1.05038	1.11878		67.036	58.5253		16854	30270		46.687	34.8733		69.6446	59.5866
1.10482	1.38119		63.1902	74.7968		13804	16293		42.3436	44.1545		67.0097	59.0326
1.07334	1.17278		67.0823	54.3086		19151	16242		47.7581	32.5491		71.1933	59.9336
1.13285	1.31448		46.2209	88.8889		20415	6116		29.673	56.6296		64.1981	63.7083
1.14277	1.12492		73.8095	27.6191		16456	8440		55.9728	16.0762		75.8341	58.2069
1.12932	1.1905		66.2314	53.75		26162	12856		48.8097	32.14		73.6958	59.7953
1.08986	1.12668		72.3869	72.1943		32091	27614		50.064	46.2546		69.1616	64.0696
1.06886	1.14483		65.0943	83.4464		19682	38940		46.4198	52.8358		71.3116	63.3171
1.09973	1.07296		51.3954	68.7919		17029	12113		39.6023	40.6476		77.0543	59.0878
1.16465	1.09534		57.8947	55		27194	7860		43.3716	32.75		74.9146	59.5455
1.11846	1.31779		43.0341	48.2059		10044	20296		31.096	31.663		72.259	65.6829
1.16845	1.24418		40.0362	74.6803		15070	18120		27.3007	46.3427		68.19	62.0548
1.12813	1.10703		36.7769	43.6046		5845	4843		24.1529	28.157		65.6742	64.5733
1.08425			55.0832			21794			40.2847			73.1342
1.12377			82.0755			26591			62.7146			76.4109
1.20947			65.9091			12360			46.8182			71.0345
1.08739			78.1407			23555			59.1834			75.7395
1.11352			33.853			10339			23.0267			68.0197
1.10751			29.2208			16051			20.8455			71.3378
1.11572			95.6081			24810			83.8176			87.6679
1.11293			62.5			22872			45.3809			72.6095
1.12417			87.0066			41832			68.8026			79.0775
1.10589			96			19018			95.09			99.0521
1.03321			89.6396			16334			73.5766			82.0804
1.06517			98.1395			32415			75.3837			76.8128
1.21199			86.1345			37442			78.6597			91.322
1.15733			34.6154			7613			22.5237			65.0684
1.05178			53.9568			10634			38.2518			70.8933
1.09201			94.5355			18003			98.377			104.064
1.09095			89.1414			31843			80.4116			90.2068
1.10116			55.0976			18077			39.2126			71.1693
1.29619			44.64			18530			29.648			66.4158
1.10084			68.9145			29860			49.1118			71.2649
1.18132			72.9805			40166			55.9415			76.6527
1.10315			71.1864			21297			51.5666			72.4388
1.09713			83.0918			13455			65			78.2267
1.08955			84.2377			25901			66.9276			79.4509
1.14512			76.8194			19129			51.5607			67.1193
1.14866			77.0936			23104			56.9064			73.8147
1.18631			90.6179			58983			67.4863			74.4735
1.06785			100			19311			104.384			104.384
1.08637			82.8473			37025			63.5077			76.6563
1.21212			64.3606			22818			47.8365			74.3257
1.07023			80.8682			35850			57.6367			71.2724
1.05671			89.2744			26067			82.2303			92.1095
1.16457			91.453			16448			70.2906			76.8598
1.07728			84.0841			42589			63.9475			76.0518
1.1494			48.9726			9896			33.8904			69.2028

## Sheet: F (Rac1)
interface linearity index			interface occupancy			E-cadherin intensity			E-cadherin intensity per interface area			cluster density
control	en	ee	control	en	ee	control	en	ee	control	en	ee	control	en	ee
1.10246	1.67674	1.18609	67.2845	19.3592	46.3246	48459	36221	174061	44.911	12.2162	40.236	66.7479	63.1028	86.8568
1.14895	1.09842	1.19825	75.1069	29.7321	53.6334	59270	13357	180906	50.7015	11.9259	42.4065	67.5057	40.1111	79.0673
1.1501	1.13807	1.16407	71.2068	89.5772	50.6315	105033	87264	346106	52.5954	85.8053	53.9694	73.8629	95.7892	106.593
1.28049	1.17048	1.1305	75.5018	39.7672	52.4792	95839	38176	111195	56.5756	37.0281	48.7911	74.9328	93.1122	92.9724
1.13118	1.09252	1.14873	79.123	95.6028	40.3881	72934	229572	146669	69.5272	113.425	52.7018	87.8723	118.642	130.488
1.11433	1.36435	1.04979	80.3936	80.4154	48.7821	79415	186003	86745	57.8826	78.8482	57.1067	71.9991	98.0511	117.065
1.13198	1.17532	1.06061	79.6837	69.7026	73.1132	86637	95169	92759	52.6989	58.9647	87.5085	66.1351	84.5947	119.689
1.09588	1.12655	1.13045	72.9818	87.014	72.1312	97821	132307	146669	45.6468	102.883	80.147	62.5454	118.237	111.113
1.09653	1.26887	1.11845	64.2619	59.6646	51.2462	69977	40152	179078	46.7448	35.4387	49.049	72.7412	59.3965	95.7125
1.15832	1.18497	1.12116	91.7462	63.6432	65.7013	194479	182801	202505	80.6632	69.0858	70.6577	87.92	108.552	107.544
1.152	1.10834	1.18477	68.3962	25.335	53.642	97100	51584	152161	45.8019	31.4154	44.872	66.9655	124	83.6509
1.16515	1.20791	1.13819	87.9642	26.0274	51.7852	181803	70666	120080	77.5941	18.2647	33.7588	88.2111	70.1748	65.19
1.09808	1.10116	1.15008	81.7764	54.0574	54.8749	39180	78895	375529	60	32.334	64.8023	73.3708	59.8143	118.091
1.11426	1.25739	1.25507	75.8306	40.802	77.2786	128978	43677	280303	47.0894	27.802	90.5957	62.0982	68.1389	117.233
1.19019	1.19718	1.16165	69.8161	57.6422	55.1423	107796	78448	164519	45.0652	40.9223	46.3564	64.5485	70.9937	84.0669
1.13753	1.11281	1.1222	74.6134	69.146	92.0511	88176	43929	238149	56.8144	60.5083	98.0844	76.1451	87.508	106.554
1.20271	1.12691	1.08609	33.0109	84.1251	99.6748	43471	77501	148891	26.2824	89.8042	121.05	79.6172	106.751	121.445
1.12348	1.18097	1.1876	35.2181	80.3874	86.8918	40796	90035	241390	21.9688	72.6675	97.0607	62.3792	90.3966	111.703
1.14278	1.13983	1.07655	26.9293	66.6172	97.3244	16201	175317	93298	13.0233	65.0286	104.011	48.3612	97.6153	106.871
1.16167	1.20055	1.15464	61.7208	78.3552	26.8081	58542	185975	12258	51.3977	76.0945	11.8206	83.2745	97.1149	44.0935
1.14714	1.11992	1.05994	69.5533	57.3716	65.9187	122021	70796	124151	41.9316	39.0922	58.0416	60.2871	68.1386	88.0503
1.1594	1.21246	1.15634	83.7838	73.6488	51.2511	58954	248480	60248	59.013	72.5913	25.9914	70.4349	98.5641	50.7138
1.12191	1.16195	1.19016	87.8699	86.9081	36.3404	223207	96296	22177	81.5517	89.4113	18.874	92.8096	102.88	51.9368
1.22915	1.16151	1.15739	81.2887	98.2079	26.7643	122826	141507	48787	76.1004	126.798	16.2407	93.6174	129.112	60.6803
1.18701	1.16527	1.18939	66.2003	77.3465	46.6387	72096	126189	46042	40.3447	73.1107	27.6363	60.9434	94.5236	59.2561
1.17619	1.25367	1.13315	78.291	92.4955	54.255	25640	98633	181573	59.2148	89.1799	55.7828	75.6342	96.4154	102.816
1.083	1.15847	1.19314	88.2051	67.4661	49.6558	43884	120133	176501	75.0154	62.6345	52.8288	85.0465	92.8385	106.39
1.1348	1.08845	1.16129	63.6544	89.8833	53.7365	37294	44000	144902	37.0348	85.6031	45.8841	58.181	95.2381	85.3872
1.1218	1.14314	1.09784	92.9791	49.2481	48.7475	87427	40706	98492	82.9478	30.606	49.3447	89.2112	62.1466	101.225
1.10562	1.10725	1.17099	91.2266	84.2035	44.049	83434	224834	123323	71.0682	60.1965	29.065	77.9029	71.4894	65.9834
1.16685	1.11119	1.38787	91.4519	83.4591	38.1291	171630	107073	70011	73.7242	67.3415	19.1496	80.6153	80.688	50.2231
1.02882	1.36172	1.15705	99.0971	49.1749	8.43636	91188	109051	21050	102.921	51.4149	5.10303	103.859	104.555	60.4885
1.10711	1.1309	1.1003	81.1756	77.3507	50.0451	76518	114504	52648	53.5465	59.4826	47.4734	65.9638	76.8999	94.8613
1.07402	1.1392	1.35389	87.71	63.1915	2.12547	144038	106081	2172	69.1493	45.1409	0.744601	78.8385	71.435	35.0323
1.31831	1.36834	1.07783	85.4439	2.17482	23.459	90483	3556	16935	59.062	1.48724	10.1347	69.1238	68.3846	43.2015
1.10325	1.14143	1.19241	77.935	60.8214	78.094	92588	113605	117298	48.5262	40.5732	52.9801	62.265	66.7087	67.8415
1.2226	1.14778	1.17487	80.528	34.0187	26.1642	34320	33904	53486	56.6337	21.124	12.8387	70.3279	62.0952	49.0697
1.20313	1.12573	1.05366	72.0043	95.2601	58.3839	85927	113294	170076	46.1725	130.976	64.5205	64.1246	137.493	110.511
1.13344	1.14511	1.08226	73.9597	99.4024	40.0697	141861	299765	34123	60.8584	149.285	29.7239	82.286	150.183	74.1804
1.1146	1.20664	1.14555	83.7479	57.2816	48.4536	35065	144962	116480	58.1509	58.6416	60.0412	69.4356	102.374	123.915
1.09976	1.21979	1.07679	83.9117	54.8201	38.1443	68776	78972	50475	72.3197	37.8763	47.3055	86.1855	69.0919	124.017
1.22716	1.13847	1.16574	71.9221	40.6707	58.8475	80746	139175	174781	50.7199	39.8897	54.7388	70.5205	98.0796	93.0181
1.09624	1.09029	1.08883	90.0615	98.1591	13.8474	90090	199271	6318	92.3053	146.739	5.23881	102.492	149.491	37.8323
1.12713	1.1403	1.04794	59.1779	86.33	60.0485	52510	56688	191380	37.2147	69.8128	77.3878	62.8862	80.8673	128.875
1.11691	1.14718	1.16192	85.318	91.8526	42.8273	130794	158954	65945	62.5509	82.4878	45.9227	73.315	89.8045	107.228
1.04223	1.20847	1.17313	79.3926	75.3684	49.9794	22681	551831	132217	49.1996	89.3653	54.3432	61.9699	118.571	108.731
1.11777	1.09795	1.13611	70.3659	96.2813	76.9066	74644	603821	190413	44.7775	136.088	67.8592	63.6351	141.344	88.2359
1.09828	1.10954	1.04089	74.6639	52.9284	79.6339	140338	68004	30418	57.1641	36.8785	69.6064	76.5619	69.6762	87.408
1.09733	1.09658	1.12064	85.1437	82.7478	23.7677	98749	128508	34910	69.2004	80.6198	11.786	81.2749	97.4283	49.5881
1.04993	1.17634	1.28366	86.2869	91.8444	63.9169	64766	73433	150658	68.3186	92.1368	42.2722	79.176	100.318	66.1361
1.26952	1.17128	1.38788	79.0356	20.9933	91.3386	287442	24609	71181	86.0863	8.66819	112.096	108.921	41.2903	122.726
1.1364	1.11334	1.14536	91.1941	66.9364	82.315	201658	40143	181610	92.9728	46.4081	78.1454	101.951	69.3316	94.9347
1.07753	1.17469	1.07296	77.4147	44.5	78.1544	86075	75629	31948	62.5091	25.2097	60.1657	80.7458	56.6509	76.9831
1.14341	1.08945	1.1442	64.3108	19.0429	37.2698	74603	13479	53453	32.7493	13.4387	33.9384	50.9235	70.5707	91.0613
1.08739	1.17407	1.11021	64.7292	95.2201	52.6654	25129	66379	47733	33.1955	83.4956	43.8722	51.2837	87.6869	83.3037
1.0841	1.17364	1.12016	73.8971	83.9544	4.27196	37058	259557	2695	45.4142	98.6909	1.62154	61.456	117.553	37.9577
1.25479		1.1217	89.8312		14.1503	160531		19259	66.0893		13.0393	73.5706		92.1483
1.13937		1.19568	93.2914		38.7845	60508		121960	63.4256		44.9208	67.9865		115.822
1.0896		1.21307	47.4308		43.2968	28941		84075	38.1304		35.4448	80.3917		81.8646
1.11313		1.17428	71.345		34.8646	48327		52470	47.1023		25.3723	66.0205		72.7739
1.16745		1.15111	73.2432		25.3327	69845		25108	47.1926		12.3746	64.4327		48.8483
1.14337		1.08547	72.7111		61.9253	50693		85503	45.0604		61.4246	61.9719		99.1914
1.09139		1.08744	61.0734		61.2893	60267		257094	40.9423		79.3011	67.0378		129.388
1.07992		1.12245	73.4948		72.0126	64876		15304	42.4581		48.1258	57.7703		66.8297
1.09197		1.10274	83.4692		74.946	104352		23305	77.3551		50.3348	92.675		67.1614
1.08166		1.1288	64.0084		13.5792	33700		27575	35.362		11.9631	55.2459		88.099
1.16703		1.08637	41.2048		18.5484	17002		6407	20.4843		12.9173	49.7135		69.6413
1.08268		1.07997	55.6619		61.1332	39923		74889	31.8365		74.4423	57.1963		121.771
1.05664		1.11888	65.7483		51.9634	63334		133089	47.1586		39.2941	71.7259		75.6188
1.13004		1.16329	67.284		86.9483	71289		202720	40.005		96.2126	59.4571		110.655
1.09682			68.7356			20481			47.0828			68.4983
1.12435			63.53			77214			37.647			59.2586
1.08195			46.9717			19612			26.3957			56.1948
1.16957			89.9614			49025			94.6429			105.204
1.14021			61.273			105931			40.6177			66.2897
1.18487			63.0045			20071			45.0022			71.427
1.04253			64.8577			49662			44.1833			68.1235
1.05436			87.7663			111343			67.7681			77.2143
1.10267			78.9539			41462			51.6339			65.3975
1.09496			58.1266			85429			36.5393			62.8617
1.11131			48.254			47922			30.4267			63.0553
1.22551			71.3043			122672			48.487			68
1.21043			70.9329			67908			52.3578			73.813
1.07394			96.7779			61401			70.6571			73.0095
1.16828			68.9487			53877			43.9095			63.6844
1.07693			90.7745			70979			80.8417			89.0577
1.15303			85.4657			193652			91.0875			106.578
1.0888			82.1402			148949			54.9627			66.9133
1.09195			83.5007			72706			52.1564			62.4622
