# Supplementary material for: Junction Mapper is a novel computer vision tool to decipher cell–cell contact phenotypes
Source: eLife. 2019 Dec 3;8:e45413. doi: 10.7554/eLife.45413 (PMC7034980; doi:10.7554/eLife.45413)
Supplement: Figure 6—source data 1. [file elife-45413-fig6-data1.xlsx]

## Sheet: Explanation
Source Data 6 complementing Figure 6
Figure 6 Panel B data	B (CIP4)	interface linearity index, interface occupancy, E-cadherin intensity, E-cadherin intensity per interface area, cluster density
Figure 6 Panel D data	D (EEF1A)	interface linearity index, interface occupancy, E-cadherin intensity, E-cadherin intensity per interface area, cluster density
Figure 6 Panel F data	F (VAV2)	interface linearity index, interface occupancy, E-cadherin intensity, E-cadherin intensity per interface area, cluster density

## Sheet: B (CIP4)
interface linearity index		interface occupancy		E-cadherin intensity		E-cadherin intensity per interface area		cluster density
control	CIP4	control	CIP4	control	CIP4	control	CIP4	control	CIP4
1.11885	1.13889	85.9195	97.9705	21811	48111	62.6753	88.7657	72.9465	90.6045
1.11999	1.07285	96.0829	92.2619	30934	40912	71.2765	81.1746	74.1822	87.9828
1.1525	1.11353	56.7568	79.3388	17960	24896	44.1278	68.584	77.7489	86.4444
1.19716	1.08781	83.2361	89.3578	61514	44639	89.6706	81.9064	107.73	91.6612
1.18388	1.12663	85.1003	92.7593	64613	45477	92.5688	88.9961	108.776	95.943
1.15258	1.09598	39.5062	78.9308	6634	20636	40.9506	64.8931	103.656	82.2151
1.10342	1.15982	94.108	75.283	68165	30974	111.563	58.4415	118.548	77.6291
1.08673	1.08176	100	68.838	33930	36901	160.047	64.9665	160.047	94.376
1.12883	1.19898	100	70.8333	49631	34105	127.586	71.0521	127.586	100.309
1.15133	1.12837	80.1402	87.5912	36402	48136	85.0514	87.8394	106.128	100.283
1.09318	1.08032	100	89.2473	48781	35792	135.503	96.2151	135.503	107.807
1.10609	1.13124	100	72.8943	47631	44399	100.7	67.9923	100.7	93.2752
1.36936	1.12669	95.2484	85.3748	39250	51849	84.7732	94.7879	89.0023	111.026
1.08711	1.0915	95.086	61.8421	35159	29676	86.3858	55.782	90.8501	90.2006
1.10349	1.0822	66.1111	27.5	12204	9133	67.8	25.3694	102.555	92.2525
1.14428	1.07122	100	60.7375	41543	24639	122.546	53.4468	122.546	87.9964
1.14393	1.15419	99.8058	95.1417	62056	53441	120.497	108.18	120.731	113.704
1.14197	1.10324	100	72.5067	87210	27239	120.124	73.4205	120.124	101.26
1.0885	1.16955	99.7222	75	41000	29922	113.889	76.3316	114.206	101.775
1.14684	1.07427	99.6627	89.4246	68602	58312	115.686	90.6874	116.078	101.412
1.07779	1.16136	100	63.7993	74961	36106	139.592	64.7061	139.592	101.421
1.2123	1.1656	100	7.72059	73866	1337	126.918	4.91544	126.918	63.6667
1.20343	1.14259	100	75.3173	45619	46300	109.136	65.3033	109.136	86.7041
1.16534	1.09727	98.2533	98.0609	53622	39271	117.079	108.784	119.16	110.935
1.13048	1.08231	100	86.2319	38035	23327	115.96	84.5181	115.96	98.0126
1.12516	1.09974	91.9952	96.8017	83215	52633	99.4206	112.224	108.071	115.932
1.10651	1.11119	100	66.2371	38182	26801	109.404	69.0747	109.404	104.284
1.12359	1.08157	98.3766	90.0917	36563	49279	118.711	90.4202	120.67	100.365
1.11443	1.06449	99.187	90.051	67407	81324	109.605	103.73	110.503	115.19
1.10878	1.06189	88.8513	60.9589	26394	19649	89.1689	67.2911	100.357	110.388
1.15342	1.13103	99.7613	76.1821	56137	41615	133.978	72.8809	134.299	95.6667
1.08013	1.08796	100	65.8974	52050	47077	118.565	60.3551	118.565	91.5895
1.1068	1.11351	100	71.8499	44456	29494	108.165	79.0724	108.165	110.052
1.15997	1.07697	99.6689	38.604	31806	19279	105.318	27.463	105.668	71.1402
1.11254	1.1021	99.5169	73.3862	45506	59289	109.918	67.145	110.451	91.4954
1.18698	1.1057	96.1539	28	74603	14221	119.556	23.7017	124.338	84.6488
1.15117	1.11239	87.2123	78.8618	33702	69343	86.1944	93.9607	98.8328	119.146
1.10214	1.1297	85.4651	66.7656	26991	20786	78.4622	61.6795	91.8061	92.3822
1.10235	1.09073	77.4278	87.6228	25061	51722	65.7769	101.615	84.9526	115.969
1.15409	1.0547	75.3788	82.9352	17347	25147	65.7083	85.8259	87.1709	103.486
1.12626	1.12022	97.2292	45.5752	34663	7898	87.3123	34.9469	89.8005	76.6796
1.14302	1.07876	99.3711	98.7342	38738	47515	81.2117	100.243	81.7257	101.528
1.12337	1.11446	90.6122	87.0647	46833	46956	95.5776	116.806	105.48	134.16
1.05996	1.08858	99.3776	65.6151	58954	19124	122.311	60.3281	123.077	91.9423
1.07196	1.08275	98.6842	56.6731	25537	24644	112.004	47.6673	113.498	84.1092
1.09878	1.08251	97.9472	63.8889	34380	26045	100.821	48.2315	102.934	75.4928
1.13676	1.10542	99.5349	55.3802	63359	31812	98.231	45.6413	98.69	82.4145
1.10307	1.10076	80.6569	67.4783	16458	34613	60.0657	60.1965	74.4706	89.2088
1.11308	1.09752	97.1944	78.1591	48305	44180	96.8036	68.9236	99.5979	88.1836
1.08631	1.15651	88.8889	94.8104	28305	57649	98.2812	115.068	110.566	121.366
1.08333	1.15649	99.7416	74.581	33180	27261	85.7364	76.148	85.9586	102.101
1.09933	1.10092	98.9712	84.7108	46528	38169	95.7366	78.8616	96.7318	93.0951
1.11495	1.14118	95.2514	87.695	33718	54662	94.1844	94.7348	98.8798	108.028
1.11882	1.18965	95.3307	99.2711	40381	76966	78.5623	112.195	82.4102	113.019
1.14488	1.07915	99.0461	100	70203	37021	111.611	117.527	112.685	117.527
1.10082	1.12749	99.2736	98.0349	39695	41066	96.1138	89.6638	96.8171	91.461
1.14148	1.05573	98.043	86.8056	53692	27967	105.072	97.1076	107.17	111.868
1.10044	1.098	89.1192	83.4483	30107	30952	77.9974	71.154	87.5203	85.2672
1.09084	1.07748	99.4444	92.944	36684	42841	101.9	104.236	102.469	112.149
1.11206	1.14315	100	80.6045	55426	25925	123.996	65.3023	123.996	81.0156
1.15188	1.15703	97.3046	94.3137	34889	52540	94.0404	103.02	96.6454	109.231
1.16126	1.09451	83.6391	82.5521	49512	30425	75.7064	79.2318	90.5155	95.9779
1.19196	1.07192	66.6667	62.2517	26291	24469	55.8195	54.0155	83.7293	86.7695
1.06576	1.09572	98.7203	77.1186	56825	31757	103.885	67.2818	105.231	87.2445
1.13022	1.10543	62.8009	93.4037	24914	35192	54.5164	92.8549	86.8084	99.4124
1.17922	1.1167	96.5217	91.0683	38667	49149	112.078	86.0753	116.117	94.5173
1.07574	1.05868	100	68.1102	25791	18811	99.5791	74.059	99.5791	108.734
1.1423	1.12704	96.1326	96.9912	39492	46238	109.094	81.8372	113.483	84.3759
1.07048	1.15101	82.6389	99.4751	62801	39851	87.2236	104.596	105.548	105.148
1.06246	1.19233	96.5675	99.2	36113	41400	82.6384	82.8	85.5758	83.4677
1.07647	1.08089	94.8669	72.2034	49974	17993	95.0076	60.9932	100.148	84.4742
1.13699	1.13587	83.4587	79.0932	50935	35436	76.594	89.2595	91.7748	112.853
1.11819	1.05449	90.3663	87.4016	63240	10681	85.8073	84.1024	94.955	96.2252
1.09878	1.10503	96.4876	88.4259	42094	18693	86.9711	86.5417	90.1371	97.8691
1.1258	1.08805	98.8658	97.4359	49572	65408	93.7089	98.6546	94.7839	101.251
1.08245	1.05984	61.6477	0	19231	0	54.6335	0	88.6221	0
1.08183	1.09389	100	86.9004	59047	50317	117.858	92.8358	117.858	106.83
1.05618	1.06422	99.359	92.1708	17152	25632	109.949	91.2171	110.658	98.9652
1.11434	1.11381	85.4599	99.3367	23821	66319	70.6855	109.982	82.7118	110.716
1.0866	1.12435	99.0926	93.1227	54311	43054	98.568	80.026	99.4707	85.9361
1.12236	1.16891	99.696	75.3769	32363	25694	98.3678	64.5578	98.6677	85.6467
1.08836	1.18635	100	94.5455	33662	59154	96.1771	89.6273	96.1771	94.7981
1.18287	1.13871	100	83.2418	41372	21384	100.662	58.7473	100.662	70.5743
1.02677	1.11974	100	52.2026	29534	18219	110.614	40.13	110.614	76.8734
1.11947	1.09384	100	93.4066	41844	38288	113.398	84.1495	113.398	90.0894
1.19627	1.11367	97.6331	71.9472	30746	36346	90.9645	59.9769	93.1697	83.3624
1.154	1.21942	91.0204	79.9213	18056	33356	73.698	65.6614	80.9686	82.1576
1.09181	1.1581	98.3099	43.7681	35390	10170	99.6901	29.4783	101.404	67.351
1.12134	1.06233	99.7429	70.6612	36192	14106	93.0386	58.2893	93.2784	82.4912
1.12557	1.08757	94.4444	43.6451	20102	12755	101.525	30.5875	107.497	70.0824
1.10476	1.08437	78.1421	38.4365	14850	7320	81.1475	23.8437	103.846	62.0339
1.05288	1.19987	94.7883	78.0702	31225	29332	101.71	64.3246	107.302	82.3933
1.28321	1.14571	92.0962	87.9679	26015	30004	89.3986	80.2246	97.0709	91.1976
1.20934	1.13518	98.234	77.458	47551	30711	104.969	73.6475	106.856	95.0805
1.23896	1.13789	100	51.0773	46685	26870	109.077	34.0558	109.077	66.6749
1.20036	1.04371	99.7268	62.6305	36255	21314	99.0574	44.4969	99.3288	71.0467
1.11621	1.10658	99.4307	90.4486	50123	53513	95.1101	77.4428	95.6546	85.6208
1.11686	1.12469	100	34.7826	43029	9154	109.768	36.1818	109.768	104.023
1.2448	1.097	98.9228	95.8237	52796	93789	94.7863	108.804	95.8185	113.546
1.20525	1.15072	91.6981	95.3815	19664	51749	74.2038	103.914	80.9218	108.945
1.07977	1.08625	100	90.2083	37874	50336	79.0689	104.867	79.0689	116.249
1.15347	1.11917	100	98.3269	51128	100744	85.6415	129.658	85.6415	131.864
1.12836	1.30471	82.3129	91.2121	33028	53207	74.8934	80.6167	90.9862	88.3837
1.05038	1.11383	92.7007	88.6256	11303	28620	82.5036	67.8199	89	76.5241
1.08913	1.18261	75.3535	97.3734	28501	50723	57.5778	95.1651	76.4102	97.7322
1.08045	1.0816	96.0836	95.421	34353	62616	89.6945	92.4904	93.3505	96.9288
1.1698	1.19727	86.2857	94.5055	33721	131172	64.2305	96.0967	74.4393	101.684
1.11333	1.09587	92.891	86.5079	56463	50058	89.199	99.3214	96.0255	114.812
1.13048	1.13546	82.0122	89.9646	19944	64648	60.8049	76.3259	74.1413	84.8399
1.34437	1.11799	78.2796	85.5215	33594	60009	72.2452	73.6307	92.2912	86.0961
1.10041	1.08715	66.3484	23.6442	19874	7076	47.432	15.3492	71.4892	64.9174
1.0824	1.16795	96.9492	0	27729	0	93.9966	0	96.9545	0
1.11862	1.08904	100	49.4436	69131	20224	111.322	32.1526	111.322	65.0289
1.13307	1.07939	100	81.4389	85195	44450	103.267	63.9568	103.267	78.5336
1.04759	1.12637	100	63.964	46309	22945	118.135	51.6779	118.135	80.7922
1.09989	1.07565	100	90.2519	66919	84819	136.014	92.9014	136.014	102.936
1.07811	1.1015	97.7778	88.8889	34818	22271	110.533	85.3295	113.045	95.9957
1.11546	1.07071	92.9273	25.6637	49398	8234	97.0491	18.2168	104.436	70.9828
1.147	1.1626	96.0748	83.9786	49438	140830	92.4075	83.8773	96.1829	99.8794
1.15006	1.17928	97.137	57.5431	48279	18827	98.7301	40.5754	101.64	70.5131
1.16376	1.15979	85.5478	59.1837	34078	30473	79.4359	44.4213	92.8556	75.0567
1.13728	1.06561	86.4516	44.1718	33824	9856	72.7398	30.2331	84.1393	68.4444
1.11758	1.12511	92.3775	66.9876	53915	35711	97.8494	49.121	105.923	73.3285
1.1278	1.12979	87.444	94.8905	36670	31898	82.2197	77.6107	94.0256	81.7897
1.11418	1.11243	98.0973	51.6854	42238	13128	89.2981	49.1685	91.0302	95.1304
1.09817	1.11886	97.6127	75.1736	39989	40289	106.072	69.9462	108.666	93.0462
1.12287	1.07125	84.3305	58.7459	26795	25606	76.339	42.2541	90.5237	71.927
1.15434	1.10725	91.0017	2.04778	45420	320	77.1137	1.09215	84.7388	53.3333
1.09552	1.13159	72.6862	51.4243	20328	24419	45.8871	36.6102	63.1304	71.1924
1.09594	1.09812	77.892	46.5346	20297	18553	52.1774	36.7386	66.9868	78.9489
1.18623	1.09671	86.1862	80.5604	24936	43085	74.8829	75.4553	86.885	93.663
1.10892	1.18375	94.4637	72.8278	26687	35569	92.3426	56.1912	97.7546	77.1562
1.13266	1.10833	65.3789	77.6364	32992	35480	49.0223	64.5091	74.9818	83.0913
1.14347	1.07318	87.0079	37.2263	24779	8402	97.5551	30.6642	112.122	82.3726
1.07916	1.15737	70.1628	49.8866	31880	17838	57.6492	40.449	82.165	81.0818
1.11252	1.13396	89.8148	82.7068	55098	37242	85.0278	70.0038	94.6701	84.6409
1.11227	1.07287	89.7849	78.1563	57417	35190	77.1734	70.521	85.9536	90.2308
1.13266	1.06791	98.8971	41.0463	35713	14908	131.298	29.996	132.762	73.0784
1.11115	1.11709	90.6542	17.8147	44485	4928	83.1495	11.7055	91.7216	65.7067
1.14512	1.16236	96.4647	78.97	19589	47531	98.9343	67.9986	102.56	86.1069
1.06632	1.10436	99.2	55.6364	48736	14042	97.472	51.0618	98.2581	91.7778
1.1155	1.07705	92.3881	65.2709	53295	19235	79.5448	47.3768	86.0986	72.5849
1.15018	1.15597	99.1501	84.96	42115	47608	119.306	76.1728	120.329	89.6573
1.09159	1.10884	81.768	91.4943	42212	38258	77.7385	87.9494	95.0721	96.1256
1.18575	1.10895	76.8953	84.4985	20452	24906	73.8339	75.7021	96.0188	89.5899
1.17294	1.1356	81.9527	99.1814	52412	73740	77.5326	100.6	94.6065	101.43
1.09769	1.09084	97.6744	50	47775	9888	101.004	50.449	103.409	100.898
1.09064	1.04663	96.3875	66.6191	56545	31075	92.8489	44.3295	96.3288	66.5418
1.12996	1.10835	99.7333	6.80272	37454	1086	99.8773	3.69388	100.144	54.3
1.07375	1.10904	100	32.1016	30440	9979	103.891	23.0462	103.891	71.7914
1.10837	1.07618	100	60.8961	37474	22079	92.5284	44.9674	92.5284	73.8428
1.14995	1.06278	87.5	68.5512	67131	12544	76.9851	44.3251	87.983	64.6598
1.0889	1.10793	98.1176	43.2184	46799	13131	110.115	30.1862	112.228	69.8457
1.08106	1.24645	95.1219	53.7961	19770	17105	96.439	37.1041	101.385	68.9718
1.07331	1.06875	99.0672	20	54792	1752	102.224	11.68	103.186	58.4
1.06059	1.10626	99.4152	53.5674	19526	33781	114.187	38.2571	114.859	71.4186
1.1014	1.23904	95.534	62.4161	63755	28882	123.796	48.4597	129.583	77.6398
1.05617	1.1778	100	75.4355	38460	34571	109.886	60.2282	109.886	79.8406
1.07898	1.19575	83.4043	45.3271	31685	13116	67.4149	30.6449	80.8291	67.6082
1.07106	1.19151	89.9743	85.1312	34629	45789	89.0206	66.7478	98.94	78.4058
1.13765	1.09194	78.3646	94.3723	36059	39988	61.4293	86.5541	78.3891	91.7156
1.14148	1.10873	96.9543	58.4906	42809	20907	108.652	49.309	112.066	84.3024
1.16622	1.17891	92.7614	84	33326	38951	89.3458	77.902	96.3179	92.7405
1.14847	1.10293	97.8648	96.1268	29881	51401	106.338	90.4947	108.658	94.141
1.04771	1.15988	99.6	84.7701	30348	61183	121.392	87.9066	121.879	103.7
1.11459	1.07865	94.0439	56.5	32429	21796	101.658	36.3267	108.097	64.295
1.10462	1.10675	77.13	27.5626	27009	8317	60.5583	18.9453	78.5145	68.7355
1.04944	1.13115	6.29921	50.1984	859	15349	3.38189	30.4544	53.6875	60.668
1.07291	1.04278	66.4247	0.604839	22937	156	41.6279	0.314516	62.6694	52
1.1369	1.10658	68.8679	67.6349	38149	38129	51.4138	52.7372	74.6556	77.9734
1.09087	1.08822	75.0583	58.4302	24628	15565	57.4079	45.2471	76.4845	77.4378
1.07759	1.13849	76.8657	48.1172	17283	22527	64.4888	31.4184	83.8981	65.2956
1.0754	1.07867	81.2332	72.2714	27548	20479	73.8552	60.41	90.9175	83.5877
1.13026	1.08662	96.8531	76.4092	29402	33086	102.804	69.0731	106.144	90.3989
1.11839	1.15395	97.5078	70.7729	32961	24284	102.682	58.657	105.307	82.8805
1.09299	1.11281	97.8417	44.5993	26325	19496	94.6942	33.9652	96.7831	76.1562
1.33476	1.07456	81.201	87.835	32638	41518	85.2167	85.6041	104.945	97.4601
1.17046	1.102	100	73.4875	52534	33048	116.226	58.8043	116.226	80.0194
1.17194	1.14369	100	90.3509	55221	57576	108.276	84.1754	108.276	93.165
1.08936	1.22262	100	90.3475	28822	47325	124.233	91.361	124.233	101.122
1.08686	1.08321	100	16.0656	56515	7255	107.853	11.8934	107.853	74.0306
1.12475	1.05466	100	80.4075	48259	41291	116.007	64.7194	116.007	80.4893
1.11556	1.10424	100	64.2523	41819	21940	114.26	51.2617	114.26	79.7818
1.12565	1.22046	81.1369	52.7316	24817	17152	64.1266	40.7411	79.035	77.2613
1.11325	1.11902	97.2145	17.7885	25334	6782	70.5682	10.8686	72.5903	61.0991
1.07335	1.07646	100	47.8469	53232	15866	88.4253	37.9569	88.4253	79.33
1.08842	1.07673	92.6004	66.7532	41353	22292	87.4271	57.9013	94.4132	86.7393
1.13241	1.11012	98.0822	65.5773	41000	26952	112.329	58.7189	114.525	89.5415
1.06801	1.15653	55.8441	38.9034	6356	10801	41.2727	28.201	73.907	72.4899
1.17459	1.12884	93.7269	83.2061	50807	48830	93.7399	74.5496	100.014	89.5963
1.12135	1.05889	91.048	57.3529	42050	13870	91.8122	50.9926	100.839	88.9103
1.16451	1.09603	92.9293	73.5043	52197	49148	87.8737	60.0098	94.5598	81.6412
1.092	1.12765	100	78.5507	43612	23496	120.475	68.1043	120.475	86.7011
1.07883	1.11493	99	58.427	27080	17360	90.2667	48.764	91.1784	83.4615
1.2012	1.10036	100	87.574	44416	56092	108.863	82.9763	108.863	94.75
1.16195	1.10942	99.7788	78.6618	41720	37817	92.3009	68.3852	92.5055	86.9356
1.05874	1.1478	45.946	63.3136	7020	18654	37.946	55.1893	82.5882	87.1682
1.05399	1.12119	100	70.0709	43578	38197	107.335	54.1801	107.335	77.3219
1.15989	1.06002	83.7838	76.5432	32472	32896	73.1351	67.6872	87.2903	88.4301
1.17343	1.14796	98.3302	62.8809	47186	39677	87.5436	54.9543	89.0302	87.3943
1.0389	1.22409	94.9091	61.7304	18633	31539	67.7564	52.4775	71.3908	85.0108
1.13478	1.06862	62.6689	88.3985	25893	72645	43.7382	91.6078	69.7925	103.63
1.11395	1.13669	8.25397	86.8778	1464	72806	4.64762	82.3597	56.3077	94.7995
1.11077	1.12711	85.6716	83.2148	22510	62261	67.194	88.5647	78.4321	106.429
1.01693	1.10718	94.4862	75.9399	30434	28315	76.2757	70.9649	80.7268	93.4488
1.09932	1.10314	99.7717	95.4955	44390	79134	101.347	101.846	101.579	106.65
1.05071	1.11915	100	84.2313	38902	55035	136.498	72.3193	136.498	85.858
1.09932	1.1233	93.379	80.0919	37647	53977	85.9521	82.66	92.0465	103.207
1.2229	1.10804	92.9314	86.1646	42622	51750	88.6112	90.6305	95.3512	105.183
1.20882	1.15927	89.9329	38.9925	11572	17472	77.6644	32.597	86.3582	83.5981
1.08144	1.25338	96.2382	77.7597	28893	35320	90.5737	57.3377	94.114	73.7369
1.15633	1.09319	90.051	72.4719	36754	21496	93.7602	60.382	104.119	83.3178
1.10699	1.14983	94.1995	81.6489	42323	25442	98.1972	67.6649	104.244	82.873
1.08037	1.17315	96.7456	50.4367	32754	16091	96.9053	35.1332	100.165	69.658
1.14291	1.09862	97.6789	53.4247	42706	8326	82.6035	38.0183	84.5663	71.1624
1.06672	1.08558	94.8718	29.2453	27287	9694	77.7407	18.2906	81.9429	62.5419
1.08513	1.09454	94.0874	2.88462	35506	480	91.2751	1.53846	97.0109	53.3333
1.07954	1.16693	97.3282	75.9112	23413	37117	89.3626	58.8225	91.8157	77.4885
1.13376	1.11702	94.0541	22.7129	30619	4641	82.7541	14.6404	87.9856	64.4583
1.13674	1.07532	82.3204	50.9203	35496	11042	65.3702	33.8712	79.4094	66.5181
1.13007	1.11255	62.5683	52.2843	18647	21675	50.9481	36.6751	81.4279	70.1456
1.09932	1.10474	52.5114	1.7341	16970	335	38.7443	0.968208	73.7826	55.8333
1.11002	1.24834	59.8466	34.763	19042	10235	48.7008	23.1038	81.3761	66.461
1.09794	1.09555	78.9474	54.0284	39427	17159	79.8117	40.6611	101.095	75.2588
1.11882	1.11242	69.556	51.7986	26250	17002	55.4968	40.7722	79.7872	78.713
1.1313	1.07404	80.778	54.7244	54937	21512	62.857	42.3465	77.8144	77.3813
1.20566	1.21149	73.3577	58.7786	20576	11135	75.0949	42.5	102.368	72.3052
1.18451	1.03525	64.5087	36.9792	45178	9347	52.2289	24.3411	80.9642	65.8239
1.09548	1.13392	41.0314	58.9124	13956	14616	31.2915	44.1571	76.2623	74.9539
1.11147	1.15446	70.3654	43.1925	43928	18675	59.4425	29.2253	84.4769	67.663
1.1414	1.07044	72.2441	60.1942	31064	22553	61.1496	43.7922	84.6431	72.7516
1.18169	1.06556	51.0131	60.1504	30043	11636	35.8081	43.7444	70.1939	72.725
1.07782	1.09529	60.215	52.6316	8823	12114	47.4355	39.8487	78.7768	75.7125
1.12522	1.09102	66.9983	65.0538	35916	17155	59.5622	46.1156	88.901	70.8884
1.08243	1.12819	47.7311	51.0417	18966	16715	31.8756	34.8229	66.7817	68.2245
1.10717	1.11198	64.1026	50.8951	24968	15167	45.7289	38.7903	71.3371	76.2161
1.10433	1.06829	61.7261	26.8293	25104	4807	47.0994	14.6555	76.304	54.625
1.12773	1.09242	69.7368	40	24984	8407	65.7474	25.4758	94.2792	63.6894
1.099	1.22643	70.4461	44.7552	29677	11951	55.1617	27.8578	78.3034	62.2448
1.14631	1.09905	61.5591	61.8421	17257	19517	46.3898	42.8004	75.3581	69.2092
1.11975	1.04792	57.5646	61.1842	31998	13976	39.3579	45.9737	68.3718	75.1398
1.18581	1.2233	77.071	34.8416	37638	4776	55.6775	21.6109	72.2418	62.026
1.1303	1.11079	70.3704	27.5093	34426	4570	53.1265	16.9888	75.4956	61.7568
1.08591	1.15882	91.922	37.9447	57553	5321	80.1574	21.0316	87.2015	55.4271
1.08506	1.12578	65.8354	52.7076	22386	10339	55.8254	37.3249	84.7955	70.8151
1.11243	1.11585	72.623	65.5612	44475	17758	72.9098	45.301	100.395	69.0973
1.07278	1.07797	85.5505	55.3846	39949	8068	91.6261	41.3744	107.102	74.7037
1.12701	1.1523	91.7135	65.3959	66737	15544	93.7317	45.5836	102.201	69.704
1.17238	1.22589	30.4045	70.8911	13310	23373	18.5635	46.2832	61.0551	65.2877
1.20621	1.10417	15.4066	53.8462	6376	22135	9.09558	41.5291	59.037	77.1254
1.10868	1.12883	20.9449	73.913	7974	11459	12.5575	55.3575	59.9549	74.8954
1.10307	1.15101	11.7347	62.4672	1474	17276	7.52041	45.3438	64.087	72.5882
1.1333	1.11695	40.3017	49.0826	12289	8049	26.4849	36.922	65.7166	75.2243
1.11308	1.09922	53.4091	65.1584	25980	32806	36.9034	49.4811	69.0957	75.9398
1.08784	1.1429	55.8479	66.3121	28586	13605	41.7924	48.2447	74.8325	72.754
1.07546	1.04381	71.4888	50.6527	37743	11154	53.0098	29.1227	74.1513	57.4948
1.15511	1.13237	40.9302	47.5676	11928	11413	27.7395	30.8459	67.7727	64.8466
1.07956	1.06002	45.1098	50.823	17112	15925	34.1557	32.7675	75.7168	64.4737
1.14576	1.06503	40.552	68.1698	14127	18706	29.9936	49.618	73.9634	72.786
1.1475	1.13135	51.3871	33.0073	27490	8824	36.3144	21.5746	70.6684	65.363
1.09336	1.11275	74.5847	92.6503	31778	27728	52.7874	61.755	70.775	66.6539
1.09006	1.10999	59.7561	69.2015	12962	33494	52.6911	42.4512	88.1769	61.3443
1.12968	1.12053	57.2565	76.1824	20576	26724	40.9066	45.1419	71.4444	59.255
1.08871	1.0875	60.7895	92.2932	17862	36306	47.0053	68.2444	77.3247	73.943
1.07622	1.11354	80.7531	74.5098	31171	30753	65.2113	46.3846	80.7539	62.253
1.12348	1.15974	21.2162	78.389	9611	23667	12.9878	46.4971	61.2166	59.3158
1.08282	1.14155	0.75188	78.7879	52	24541	0.390977	67.6061	52	85.8077
1.25315	1.22958	7.15532	58.4087	2438	21451	4.2548	38.7902	59.4634	66.4118
1.17711	1.08264	41.7062	79.7468	7158	22056	33.9242	55.838	81.3409	70.019
1.09423	1.12736	59.9309	94.2149	24861	35917	42.9378	74.2087	71.6455	78.7653
1.11319	1.06431	56.4179	83.3333	13342	19631	39.8269	65.4367	70.5926	78.524
1.08037	1.09532	55.8064	75.7202	13446	27543	43.3742	56.6728	77.7225	74.8451
1.09495	1.08284	62.6703	82.1012	34203	16293	46.5981	63.3969	74.3543	77.218
1.10762	1.15447	23.1608	79.7619	5276	32885	14.376	65.248	62.0706	81.8035
1.09332	1.10347	6.79157	85.8306	1672	40184	3.91569	65.4463	57.6552	76.2505
1.12445	1.08493	20.9836	84.5361	7576	25391	12.4197	65.4407	59.1875	77.4116
1.09433	1.12308	25.0474	73.4341	8026	25990	15.2296	56.1339	60.803	76.4412
1.09336	1.15579	44.2697	71.134	13827	19047	31.0719	49.0902	70.1878	69.0109
1.1562	1.16275	41.4966	67.3611	19581	22337	26.6408	51.706	64.2	76.7595
1.16039	1.05288	53.9554	68.0723	20627	8619	41.8398	51.9217	77.5451	76.2743
1.10069	1.12081	70.6897	69.8514	32063	23136	50.2555	49.121	71.0931	70.3222
1.15022	1.13941	39.2593	52.5672	7197	15925	26.6556	38.9364	67.8962	74.0698
1.08983	1.09645	74.188	83.209	28260	36009	48.3077	67.181	65.1152	80.7377
1.09685	1.11013	54.5145	52.7322	20833	25624	35.4906	35.0055	65.1031	66.3834
1.10128	1.11054	48.4496	98.4314	9643	24787	37.376	97.2039	77.144	98.753
1.10667	1.12028	65.1952	74.0803	25125	33146	42.657	55.4281	65.4297	74.8217
1.11947	1.06488	21.8274	96.8317	3709	46185	18.8274	91.4554	86.2558	94.4479
1.10062	1.13302	57.1429	57.7434	13430	17563	39.1545	38.8562	68.5204	67.2912
1.15673	1.13563	55.6452	86.3461	15969	41651	42.9274	80.0981	77.1449	92.7639
1.10634	1.09606	64.526	88.5321	31895	28866	48.7691	66.2064	75.5806	74.7824
1.10093	1.05651	49.8246	100	10658	29682	37.3965	102.352	75.0563	102.352
1.18486	1.15667	70.4459	96.2472	40796	32580	51.9694	71.9205	73.7722	74.7248
1.10356	1.1337	39.5866	71.5013	16526	25661	26.2735	65.2952	66.3695	91.3203
1.15533	1.11213	86.7188	56.3707	9420	9311	73.5938	35.9498	84.8649	63.774
1.09238	1.08026	68.04	86.413	45867	14238	57.2622	77.3804	84.1596	89.5472
1.1304	1.09931	78.6301	80.0699	27401	20815	75.0712	72.7797	95.4739	90.8952
1.12475	1.1439	75	85.7349	29595	44042	71.1418	63.4611	94.8558	74.0202
1.12009	1.04722	75.4794	70.8934	39089	19455	53.5466	56.0663	70.9419	79.0854
1.19222	1.11989	91.458	66.3461	61961	5205	91.2533	50.0481	99.7762	75.4348
1.20131	1.15672	33.5968	37.3134	5653	7669	22.3439	28.6157	66.5059	76.69
1.12887	1.11364	94.1529	71.4286	72039	29673	108.004	49.8706	114.712	69.8188
1.10357	1.13901	75.7634	45.5157	34231	12799	65.3263	28.6973	86.2242	63.0493
1.13678	1.1169	18.6321	57.3394	5578	19224	13.1557	44.0917	70.6076	76.896
1.07976	1.04195	91.716	98.0392	34178	24853	101.118	97.4627	110.252	99.412
1.13878	1.02882	72.5806	82.4601	17682	27787	57.0387	63.2961	78.5867	76.7597
1.08052	1.09414	97.992	94.9685	30607	15322	122.92	96.3648	125.439	101.47
1.10897	1.08902	96.4956	93.0622	80872	35458	101.216	84.8277	104.892	91.1517
1.14042	1.10383	90.9615	87.7348	57058	57822	109.727	63.8917	120.63	72.8237
1.18327	1.10526	86.7059	21.3983	67524	5998	79.44	12.7076	91.6201	59.3861
1.14483	1.09873	97.6257	70.2655	84961	32792	118.661	58.0389	121.546	82.5995
1.1267	1.07967	96.9183	33.1633	73833	4412	113.764	22.5102	117.382	67.8769
1.11927	1.09495	93.0521	90.2605	40989	73681	101.71	83.4439	109.304	92.4479
1.084	1.06604	84.106	0	26409	0	87.447	0	103.972	0
1.13574	1.14619	35.4839	47.1963	8039	31020	28.8136	36.2383	81.202	76.7822
1.13238	1.03152	90.8163	56.0345	25788	9452	87.7143	40.7414	96.5843	72.7077
1.06388	1.19077	92.5373	60.1108	41075	14966	87.58	41.4571	94.6429	68.9677
1.11852	1.11507	94.2149	64.2105	69394	17634	95.584	46.4053	101.453	72.2705
1.12336	1.13074	67.7249	60.7798	22018	22047	58.2487	50.5665	86.0078	83.1962
1.10985	1.0842	69.7464	54.4444	33773	17113	61.183	38.0289	87.7221	69.849
1.14962	1.13441	96.0969	86.6667	70714	21470	95.1736	71.5667	99.0392	82.5769
1.11054	1.09651	92.2619	46.383	46667	6874	92.5932	29.2511	100.359	63.0642
1.10856	1.11972	92.691	48.6364	27942	7500	92.8306	34.0909	100.15	70.0935
1.11596	1.10049	97.5379	58.7248	58270	28090	110.36	47.1309	113.146	80.2571
1.164	1.09669	90.776	72.4014	57692	16889	84.4685	60.5341	93.0516	83.6089
1.09212	1.09755	82.8358	84.9673	24678	32520	92.0821	70.8497	111.162	83.3846
1.10165	1.03618	82.3383	82.4242	28495	24510	70.8831	74.2727	86.0876	90.1103
1.15924	1.09964	99.2043	88.7324	39058	16156	103.602	75.8498	104.433	85.4815
1.12589	1.10166	91.5493	89.3528	80677	37912	87.4074	79.1482	95.4757	88.5794
1.12725	1.125	56.6787	8.78661	16055	1256	57.9603	5.25523	102.261	59.8095
1.12644	1.09394	87.5	78.5499	46743	22063	108.201	66.6556	123.659	84.8577
1.11131	1.07861	86.7521	86.2963	40802	18193	87.1838	67.3815	100.498	78.0815
1.09211	1.07662	93.4146	91.3174	36410	33227	88.8049	99.482	95.0653	108.941
1.19229	1.04967	91.7148	79.529	57941	36637	111.64	66.3714	121.725	83.4556
1.1148	1.13471	65.6977	52.1367	29764	11422	57.6822	32.5413	87.7994	62.4153
1.13724	1.0327	54.6667	79.4286	9311	21902	41.3822	62.5771	75.6992	78.7842
1.08237	1.11672	100	45.6221	63352	6675	114.148	30.7604	114.148	67.4242
1.0682	1.18958	99.4885	75.3463	47268	21417	120.89	59.3269	121.512	78.739
1.10255	1.13785	94.8529	100	52197	42747	127.934	105.809	134.876	105.809
1.09838	1.17879	92.3423	87.055	23630	46981	106.441	76.021	115.268	87.3253
1.14108	1.16106	94.081	89.5903	64915	72581	101.114	80.3776	107.475	89.7169
1.08166	1.13188	76.7089	58.8349	26259	22558	66.4785	43.8019	86.6634	74.4488
1.09926	1.11525	31.068	37.8453	4683	7993	22.733	22.0801	73.1719	58.3431
1.08858	1.06154	83.2418	29.0076	37520	5124	103.077	19.5572	123.828	67.421
1.14643	1.11739	88.9665	77.2201	60572	13754	84.5978	53.1043	95.0895	68.77
1.08217	1.1624	74.7945	86.6848	24790	22711	67.9178	61.7147	90.8059	71.1944
1.04272	1.04975	83.9888	79.2763	24571	17291	69.0197	56.8783	82.1773	71.7469
1.12983	1.01638	90.4762	80.9524	27745	19396	69.5363	71.0476	76.856	87.7647
1.16183	1.08799	82.337	63.7209	31280	19369	85	45.0442	103.234	70.6898
1.10609	1.20833	67.2489	75.7252	23478	35842	51.262	54.7206	76.2273	72.2621
1.06899	1.04041	85	84.4358	34749	16429	82.7357	63.9261	97.3361	75.7097
1.09808	1.13786	91.1932	73.3219	24323	32595	69.0994	56.1016	75.7726	76.5141
1.06808	1.1376	98.6842	75.8015	31984	83194	105.21	63.5069	106.613	83.7805
1.15249	1.09931	93.9024	72.7778	35098	35309	85.6049	65.387	91.1636	89.8448
1.06863	1.04957	97.2393	81.4126	29993	38285	92.0031	71.1617	94.6151	87.4087
1.11115	1.12803	85.5228	83.7795	26941	46783	72.2279	73.674	84.4545	87.938
1.26285	1.09402	66.7712	98.7616	39747	30618	62.2994	94.7926	93.3028	95.9812
1.10183	1.07471	0	64.0138	0	12464	0	43.128	0	67.373
1.10365		76.3713		48699		68.4937		89.6851
1.05921		83.2536		16546		79.1675		95.092
1.07751		97.1134		49714		102.503		105.55
1.1292		89.9029		54156		105.157		116.968
1.06763		86.711		22318		74.1462		85.5096
1.12715		94.7126		46884		107.779		113.796
1.08994		95.5947		24446		107.692		112.654
1.06508		95.6044		21599		79.1172		82.7548
1.04692		99.4962		42801		107.811		108.357
1.10051		91.1854		28905		87.8571		96.35
1.18934		82.0181		59771		77.3234		94.276
1.11218		74.4639		38097		74.2632		99.7304
1.04779		100		32373		93.0259		93.0259
1.07967		75.3165		9713		61.4747		81.6218
1.08481		98.8722		33129		124.545		125.966
1.11089		92.3313		63164		96.8773		104.924
1.12904		95.8333		70720		95.0538		99.1865
1.05713		97.0472		42506		83.6732		86.2191
1.12007		89.7233		53170		105.079		117.115
1.09292		85.1449		21838		79.1232		92.9277
1.11155		100		33428		111.799		111.799
1.05529		100		44305		126.948		126.948
1.09673		88.391		46982		95.6864		108.254
1.12951		85.2941		27840		90.9804		106.667
1.1003		91.9753		46131		94.9197		103.201
1.14531		98.2143		48445		108.136		110.102
1.09629		100		52395		109.156		109.156
1		100		13046		124.248		124.248
1.19666		99.7613		92639		110.548		110.812
1.07004		100		26219		127.277		127.277
1.16473		99.6865		82824		129.818		130.226
1.22557		100		52698		113.819		113.819
1.1324		100		38118		97.4885		97.4885
1.11129		86.0241		34956		84.2313		97.916
1.06124		94.6475		74945		97.8394		103.372
1.11507		67.6768		48380		61.0859		90.2612
1.18273		85.7294		77304		81.7167		95.3194

## Sheet: D (EEF1A)
interface linearity index		interface occupancy		E-cadherin intensity		E-cadherin intensity per interface area		cluster density
control	EEF1A	control	EEF1A	control	EEF1A	control	EEF1A	control	EEF1A
1.07785	1.13121	56.3246	89.0432	23126	63934	55.1933	98.6636	97.9915	110.804
1.07463	1.13622	47.2885	66.6667	19691	27475	42.7137	69.9109	90.3257	104.866
1.10735	1.08463	39.1969	57.2289	17638	34639	33.7247	52.1672	86.039	91.1553
1.1494	1.09277	43.9024	85.6209	17377	30312	42.3829	99.0588	96.5389	115.695
1.1392	1.07728	41.048	89.2857	18206	16104	39.7511	95.8571	96.8404	107.36
1.12631	1.16518	52.2522	76.3279	10796	69873	48.6306	80.6848	93.069	105.708
1.08544	1.15073	78.0776	85.9079	45672	35735	77.0186	96.8428	98.6436	112.729
1.19457	1.16434	65.0092	91.5575	34644	66220	63.8011	96.3901	98.1416	105.278
1.1006	1.1245	46.3918	76.4133	12009	36810	41.268	71.7544	88.9556	93.9031
1.12143	1.10243	41.0405	96.2085	25201	25013	36.4176	118.545	88.7359	123.217
1.1936	1.10175	5.76132	91.5323	1149	50176	4.72839	101.161	82.0714	110.52
1.08947	1.21937	22.4638	95.9248	10740	42415	19.4565	132.962	86.6129	138.611
1.09917	1.11144	13.1332	44.8198	6177	18332	11.5891	41.2883	88.2429	92.1206
1.22117	1.17266	37.931	89.7567	19262	79464	33.2103	101.746	87.5545	113.358
1.17597	1.19127	59.2702	85.8268	58346	47668	57.5404	93.8346	97.0815	109.33
1.15311	1.13658	73.3167	75.3372	29627	38713	73.8828	74.5915	100.772	99.0102
1.11862	1.15375	72.8926	57.1429	40695	44183	67.2645	55.3672	92.2789	96.8925
1.14008	1.16547	67.3981	71.8004	42871	71039	67.1959	77.0488	99.7	107.31
1.12826	1.10669	40.1109	79.7441	19710	38235	36.4325	81.5245	90.8295	102.233
1.23007	1.10154	45.2489	79.4393	36521	19129	41.3133	89.3879	91.3025	112.523
1.14173	1.20032	42.9825	81.808	19196	82382	42.0965	91.9442	97.9388	112.39
1.09734	1.15266	53.7549	98.3522	12736	114261	50.3399	117.674	93.6471	119.645
1.09217	1.07125	23.8619	87.9004	13100	28817	20.5651	102.552	86.1842	116.668
1.08506	1.14083	38.2681	100	13108	65919	36.6145	133.982	95.6788	133.982
1.08736	1.12131	32.2476	71.3666	8797	65915	28.6547	71.4913	88.8586	100.175
1.08204	1.15978	44.6154	99.1509	8957	137161	45.9333	129.397	102.954	130.505
1.14577	1.15927	41.8344	90.8964	17857	72857	39.9485	102.041	95.492	112.26
1.20739	1.15628	36.8421	90.9439	9082	84515	31.8667	107.8	86.4952	118.534
1.16351	1.11956	19.1268	97.2713	8244	84233	17.1393	135.206	89.6087	138.998
1.06227	1.08058	49.5238	98.3871	9275	98950	44.1667	132.997	89.1827	135.178
1.14291	1.20073	15.5515	63.4758	7264	67782	13.1356	62.9944	84.4651	99.2416
1.0673	1.17995	12.297	79.4504	4412	61457	10.2367	73.4253	83.2453	92.4165
1.12134	1.14508	21.8629	42.2642	14350	11396	18.564	43.0038	84.9112	101.75
1.09836	1.12476	27.6821	84.6037	20319	51974	26.9126	79.2287	97.2201	93.6469
1.18153	1.12902	12.8151	83.4356	4923	41299	10.3424	84.456	80.7049	101.223
1.19302	1.21502	9.55414	95.5514	4043	115834	8.58386	107.353	89.8444	112.351
1.19504	1.10466	48.0892	94.0584	28519	120654	45.4124	121.504	94.4338	129.18
1.18051	1.14124	27.6747	88.0734	18195	35440	25.9558	108.379	93.7887	123.056
1.04597	1.15521	35.6021	91.2281	6067	92830	31.7644	101.787	89.2206	111.575
1.14016	1.1273	23.114	97.9381	12174	84133	19.5409	173.47	84.5417	177.122
1.16511	1.15941	14.9123	71.0059	5742	38639	12.5921	76.211	84.4412	107.331
1.1518	1.13517	39.8243	93.2939	24652	58307	36.0937	115.004	90.6324	123.271
1.11563	1.08643	18.7938	90	11141	123984	15.6255	103.32	83.1418	114.8
1.16543	1.06722	26.6748	84.8837	19284	49218	23.4884	95.3837	88.0548	112.37
1.08732	1.1362	21.8527	91.1833	8020	48372	19.0499	112.232	87.1739	123.084
1.12484	1.08968	29.0749	77.904	17339	66360	25.4611	83.7879	87.5707	107.553
1.06694	1.20999	30.7692	81.3204	10109	55253	25.0844	88.9742	81.5242	109.412
1.13221	1.08119	11.8012	46.7742	4615	8859	9.55487	47.629	80.9649	101.828
1.16061	1.15504	43.2061	80.7365	26469	36883	40.4107	104.484	93.53	129.414
1.14918	1.10218	11.8987	84.3038	4123	38127	10.438	96.5241	87.7234	114.496
1.16844	1.07799	58.4106	40	41063	12218	54.3881	34.9086	93.1134	87.2714
1.12875	1.13483	2.9361	84.0741	1424	30412	2.45941	112.637	83.7647	133.974
1.09354	1.14385	50.5882	81.4414	16071	46363	47.2677	83.5369	93.436	102.573
1.28295	1.14861	66.24	54.918	40036	13485	64.0576	55.2664	96.7053	100.634
1.12893	1.14894	65.7767	65.2672	50592	49000	61.3981	62.341	93.3432	95.5166
1.1397	1.10852	67.094	95.6175	29316	26453	62.641	105.39	93.3631	110.221
1.08239	1.0659	26.8116	74.4095	3203	39712	23.2101	78.1732	86.5676	105.058
1.19703	1.14519	43.738	89.6424	21504	73015	41.4335	90.0308	94.7313	100.433
1.10415	1.12474	61.0766	88.1226	29629	46260	61.3437	88.6207	100.437	100.565
1.11997	1.15051	54.8628	97.3277	20790	77348	51.8454	108.788	94.5	111.775
1.05953	1.10174	95.4861	37.0787	34142	7367	118.549	41.3876	124.153	111.621
1.25869	1.18906	63.4731	62.1479	32313	37562	64.497	66.1303	101.613	106.408
1.15481	1.11267	85.3211	81.9168	33977	58834	103.905	106.391	121.781	129.876
1.04818	1.12432	84.8571	83.5347	35677	66704	101.934	100.761	120.125	120.622
1.08578	1.11694	72.119	87.9032	22987	25645	85.4535	103.407	118.49	117.638
1.10462	1.18716	100	87.3809	23907	44150	131.357	105.119	131.357	120.3
1.11261	1.06976	78.1395	72.1088	38921	26965	90.5139	91.7177	115.836	127.193
1.14033	1.10352	85.8311	92.8349	32165	81162	87.6431	126.421	102.111	136.178
1.21229	1.13522	78.9077	83.2727	43576	57746	82.064	104.993	104	126.083
1.31225	1.1631	96.6719	91.0714	74341	50418	117.815	112.54	121.871	123.573
1.06865	1.06785	90.3361	13.5135	25559	3843	107.391	20.773	118.879	153.72
1.13821	1.13231	87.1849	92.7318	51745	47316	108.708	118.587	124.687	127.881
1.14215	1.18233	83.4459	66.7401	25549	30932	86.3142	68.1322	103.437	102.086
1.17412	1.1518	86.3063	73.3202	54433	40639	98.0775	80.3142	113.639	109.539
1.15037	1.16803	88.3041	82.6562	18080	67914	105.731	106.116	119.735	128.382
1.10819	1.17237	74.3158	90.8046	37949	48386	79.8926	111.232	107.504	122.496
1.07967	1.11746	82.3834	77.5068	17374	32002	90.0207	86.7263	109.27	111.895
1.0625	1.17361	96.9432	81.6265	24162	34264	105.511	103.205	108.838	126.435
1.2013	1.13929	95.3846	74.4395	26666	17922	102.561	80.3677	107.524	107.964
1.24672	1.10221	71.4744	79.661	44763	50171	71.7356	106.294	100.365	133.434
1.20442	1.13763	84.2105	97.4734	20508	93854	83.0283	124.806	98.5961	128.041
1.09159	1.15191	85.9155	81.2866	27572	71717	97.0845	104.849	113	128.987
1.31513	1.16717	94.6984	85.3026	62849	70967	114.898	102.258	121.33	119.877
1.20893	1.08593	81.1502	92.4699	28888	39344	92.2939	118.506	113.732	128.156
1.10258	1.13768	78.4672	91.9509	47668	76596	86.9854	104.497	110.856	113.644
1.14628	1.14929	84.6535	84.7258	38225	65745	94.6163	85.829	111.769	101.302
1.08406	1.15033	91.3043	89.2448	29250	48146	105.978	110.174	116.071	123.451
1.20411	1.16909	76.1411	88.016	41786	77524	86.6929	103.228	113.858	117.283
1.13741	1.10007	97.7401	84.9885	21628	110298	122.192	127.365	125.017	149.861
1.1144	1.18577	83.1897	85.5565	22193	119236	95.6595	101.305	114.99	118.407
1.07489	1.07254	95.4545	62.2857	31216	15348	118.242	87.7029	123.873	140.807
1.10343	1.12807	79.4926	76.4516	36524	57629	77.2178	92.95	97.1383	121.58
1.16724	1.17218	94.6459	91.8699	66298	61513	114.504	125.026	120.982	136.091
1.10767	1.22304	91.5305	95.1183	78102	81737	116.05	120.913	126.789	127.118
1.15968	1.19129	96.9697	92.3809	67470	40777	113.586	129.451	117.135	140.127
1.21584	1.07758	88.9764	76.7635	93985	42657	105.72	88.5	118.818	115.289
1.14291	1.14334	99.5556	97.9351	31172	90333	138.542	133.234	139.161	136.044
1.13621	1.18572	83.6601	89.8973	25270	64365	82.5817	110.214	98.7109	122.6
1.13734	1.10166	87.5969	85.8542	72591	83215	93.7868	90.5495	107.066	105.469
1.18469	1.17423	93.8775	90.2521	43183	70632	97.9206	118.709	104.307	131.531
1.12697	1.1523	86.6142	88.5496	47963	46271	94.4154	117.738	109.007	132.963
1.15155	1.20469	94.1019	62.9442	41702	27392	111.802	69.5228	118.809	110.452
1.09422	1.10375	64.9718	98.067	34686	78961	65.322	101.754	100.539	103.76
1.15831	1.14626	71.5942	85.2734	54623	113587	79.1638	100.165	110.573	117.463
1.12397	1.13795	83.5243	84.7262	69533	37606	99.6175	108.375	119.268	127.912
1.11307	1.14091	90.458	91.2633	28731	90349	109.66	106.669	121.228	116.881
1.09704	1.23424	97.537	82.5485	24783	32702	122.084	90.5873	125.167	109.738
1.13875	1.19453	90.409	88.2075	76920	64044	108.491	100.698	120	114.16
1.11059	1.122	94.8718	83.4395	36618	31288	117.365	99.6433	123.71	119.42
1.13515	1.17144	81.0924	80.0781	20479	26146	86.0462	102.133	106.109	127.541
1.17491	1.13741	93.6774	98.0309	86316	84370	111.376	118.664	118.893	121.047
1.13884	1.15283	96.7442	98.806	80611	43272	124.978	129.17	129.184	130.731
1.13181	1.21882	79.7244	98.0392	40994	24464	80.6968	159.895	101.22	163.093
1.28915	1.15025	84.5779	99.6524	58103	98997	94.323	114.713	111.522	115.113
1.11109	1.10431	78.4404	88.6076	50488	32229	77.1988	101.99	98.4172	115.104
1.16801	1.16545	30.6376	92.0325	17282	59897	26.8771	97.3935	87.7259	105.825
1.19697	1.13233	30.8642	97.3357	6749	66064	27.7737	117.343	89.9867	120.555
1.34951	1.09028	23.6471	70.7182	18083	25738	21.2741	71.0995	89.9652	100.539
1.13115	1.07776	26.6667	88.5017	3706	29357	24.7067	102.289	92.65	115.579
1.12715	1.07328	10.4167	89.5349	2284	35720	9.51667	103.837	91.36	115.974
1.12675	1.15483	39.6022	87.8788	18844	45390	34.0759	105.804	86.0457	120.398
1.23417	1.13836	15.8292	92.9825	5488	45909	13.7889	115.06	87.1111	123.744
1.15682	1.09662	41.1972	88.3064	10525	42080	37.0599	84.8387	89.9573	96.0731
1.15928	1.05236	42.6791	37.1212	25341	4979	39.472	37.7197	92.4854	101.612
1.16607	1.1209	8.20771	99.0964	4046	39476	6.77722	118.904	82.5714	119.988
1.10242	1.1819	13.5734	98.7608	4420	123718	12.2438	153.306	90.2041	155.23
1.10986	1.07141	15.1316	96.5567	5745	84526	12.5987	121.271	83.2609	125.596
1.09898	1.19119	1.0084	99.6135	478	126077	0.803361	121.814	79.6667	122.286
1.16795	1.08123	8.33333	100	1324	25531	6.4902	187.728	77.8824	187.728
1.22428	1.15429	6.61157	86.1539	637	16480	5.26446	126.769	79.625	147.143
1.07111	1.14976	11.7493	74.4186	3654	53899	9.54047	89.5332	81.2	120.31
1.0947	1.07993	10.6918	63.745	2916	15689	9.16981	62.506	85.7647	98.0563
1.16943	1.13532	27.9441	24.4288	12009	12366	23.9701	21.7329	85.7786	88.964
1.12444	1.12789	36.4729	35.3211	15966	9808	31.996	44.9908	87.7253	127.377
1.16383	1.06649	19.3662	69.2841	4625	30056	16.2852	69.4134	84.0909	100.187
1.11615	1.13207	8.13492	56.8627	3491	30172	6.92659	59.1608	85.1463	104.041
1.12875	1.12196	19.242	85.8407	6003	30678	17.5015	90.4956	90.9545	105.423
1.11955	1.11663	0.253807	80.6569	76	49613	0.192893	90.5347	76	112.247
1.25175	1.15745	5.08197	80.6452	2556	44385	4.19016	84.222	82.4516	104.435
1.08858	1.0867	4.12088	89.1738	1463	37919	4.01923	108.031	97.5333	121.147
1.15261	1.07756	13.3005	79.2517	2674	51891	13.1724	88.25	99.037	111.354
1.13519	1.1076	19.1851	88.6364	9834	45346	16.6961	93.6901	87.0266	105.702
1.12413	1.24542	47.451	83.3585	10866	61979	42.6118	93.7655	89.8016	112.485
1.1936	1.13761	43.2099	85.8639	9268	77387	38.1399	101.292	88.2667	117.968
1.08204	1.17632	44.2478	79.8165	17448	34364	38.6018	78.8165	87.24	98.7471
1.136	1.14319	38.3632	90.8815	13652	33376	34.9156	101.447	91.0133	111.625
1.14809	1.11658	34.6484	89.547	18388	26835	31.5403	93.5017	91.0297	104.416
1.12965	1.16128	28.9668	82.9137	13885	51377	25.6181	92.4047	88.4395	111.447
1.11243	1.0929	35.5805	76.3699	8415	26168	31.5169	89.6164	88.579	117.345
1.17039	1.0985	14.359	95.5939	4685	65084	12.0128	124.682	83.6607	130.429
1.16126	1.12381	18.4659	95.7921	5874	45552	16.6875	112.752	90.3692	117.705
1.07448	1.1034	33.1288	97.1204	14428	49074	29.5051	128.466	89.0617	132.275
1.07946	1.13603	22.0211	87.799	12461	43506	18.7949	104.081	85.3493	118.545
1.12033	1.16428	18.9011	73.3607	7347	58521	16.1472	79.9467	85.4302	108.978
1.28995	1.07223	27.0492	86.3105	2775	57618	22.7459	96.1903	84.0909	111.447
1.10767	1.10584	28.51	66.8394	18002	26090	25.7908	67.5907	90.4623	101.124
1.07032	1.07557	26.5861	78.6325	8289	12575	25.0423	107.479	94.1932	136.685
1.19333	1.09545	50.1695	66.955	26576	39532	45.0441	68.3945	89.7838	102.15
1.15383	1.12353	40.2597	90.3084	5671	65596	36.8247	96.323	91.4677	106.66
1.11918	1.24578	34.8214	95.7944	14241	43474	31.7879	101.575	91.2885	106.034
1.1562	1.13601	18.6046	95.0382	3353	92629	15.5953	117.849	83.825	124.001
1.11149	1.09134	19.0298	98.6207	4561	18932	17.0187	130.565	89.4314	132.392
1.16316	1.20506	39.2064	93.6434	21617	75957	34.3127	117.763	87.5182	125.757
1.11054	1.15232	5.7072	91.6849	2114	57267	5.24566	125.311	91.913	136.675
1.11882	1.09353	23.0769	90.7407	6789	38673	19.3419	119.361	83.8148	131.541
1.11506	1.19861	4.19753	97.1014	1419	58298	3.5037	140.816	83.4706	145.02
1.15409	1.14836	29.1667	93	6670	44956	25.2651	112.39	86.6234	120.85
1.12445	1.22788	46.0123	95.4183	14604	60523	44.7976	120.564	97.36	126.353
1.14733	1.07855	25.614	93.9394	13083	110599	22.9526	119.696	89.6096	127.418
1.18573	1.1455	36.0656	97.3422	16702	69827	30.4226	115.992	84.3535	119.159
1.13424	1.1418	8.61538	81.346	2242	115400	6.89846	84.4184	80.0714	103.777
1.09532	1.19381	33.4337	85.3276	9684	63612	29.1687	90.6154	87.2432	106.197
1.12193	1.19228	49.2366	37.0455	24635	14787	47.0134	33.6068	95.4845	90.7178
1.07257	1.14379	12.0148	49.7487	5423	19405	10.024	48.7563	83.4308	98.005
1.1578	1.1736	39.4602	61.5265	28483	38046	36.6105	59.2617	92.7785	96.319
1.13022	1.09414	43.617	25.1082	18477	5288	39.3128	22.8918	90.1317	91.1724
1.11953	1.13346	53.719	58.5965	18368	31911	50.6005	55.9842	94.1949	95.5419
1.11463	1.21013	53.5649	0	27065	0	49.479	0	92.372	0
1.16091	1.09736	60.0719	35.5102	15742	23246	56.6259	31.6272	94.2635	89.0651
1.18942	1.17928	35.4528	42.79	16873	24294	32.5106	38.0784	91.7011	88.989
1.07822	1.07745	37.7155	0	14771	0	31.8341	0	84.4057	0
1.26226	1.1667	29.2835	50.911	8189	46265	25.5109	49.5874	87.117	97.4
1.12756	1.08431	1.05541	56.9423	312	33929	0.823219	52.9314	78	92.9562
1.10457	1.1312	3.44168	62.1908	1453	18193	2.7782	64.2862	80.7222	103.369
1.09765	1.16793	0.434783	34.7826	76	15925	0.330435	31.4723	76	90.483
1.1076	1.11146	35.3488	26.4423	13612	15185	31.6558	24.3349	89.5526	92.0303
1.10103	1.10122	35.5556	58.8154	8898	37589	32.9556	51.7755	92.6875	88.0304
1.13366	1.18727	13.602	31.127	4625	17065	11.6499	30.5277	85.6482	98.0747
1.08177	1.11625	18	47.4627	3749	15056	14.996	44.9433	83.3111	94.6918
1.07919	1.18134	16.5574	65.4717	8535	35957	13.9918	67.8434	84.5049	103.623
1.13855	1.10359	39.4636	75.1166	19141	49743	36.6686	77.3608	92.9175	102.988
1.14888	1.07393	26.1029	46.7797	7125	12719	26.1948	43.1153	100.352	92.1667
1.10072	1.15955	48.1667	13.9053	26167	4241	43.6117	12.5473	90.5433	90.234
1.18244	1.11759	43.4608	72.5953	19720	37024	39.6781	67.1942	91.2963	92.56
1.18328	1.04441	70.303	76.4988	33300	30386	67.2727	72.8681	95.6897	95.2539
1.16175	1.12892	44.5415	34.2327	28503	19266	41.4891	32.489	93.1471	94.9064
1.19367	1.12981	53.7572	42.033	51475	14919	49.5906	40.9863	92.2491	97.5098
1.10903	1.08411	47.5525	33.5484	19314	5372	45.021	34.6581	94.6765	103.308
1.10897	1.14257	70.1461	67.4812	35715	35288	74.5616	66.3308	106.295	98.2953
1.16267	1.18513	56.9966	36.6987	14860	21933	50.7167	35.149	88.982	95.7773
1.05494	1.17228	67.2986	69.7232	28715	41750	68.045	72.2318	101.109	103.598
1.14131	1.08827	89.6342	50.6045	34699	29291	105.79	50.5889	118.024	99.9693
1.11537	1.11247	68.9737	27.3438	26686	6710	63.6897	26.2109	92.3391	95.8571
1.12352	1.16616	91.3628	59.697	50151	37373	96.2591	56.6258	105.359	94.8553
1.07777	1.14637	69.7026	46.5609	39495	32229	73.4108	42.6309	105.32	91.5597
1.11463	1.19281	70.3601	69.8324	25305	50305	70.097	70.2584	99.626	100.61
1.09476	1.0979	66.6667	61.039	24193	32867	63.4987	60.9777	95.248	99.8997
1.09364	1.13229	85.5856	53.8847	31785	41552	95.4505	52.0702	111.526	96.6326
1.12341	1.13845	49.3056	40.9091	21093	33465	48.8264	38.0284	99.0282	92.9583
1.08968	1.08438	71.7791	51.2941	21560	41120	66.135	48.3765	92.1368	94.3119
1.08193	1.13043	74.3017	45.2546	29647	37174	82.8128	43.0255	111.455	95.0742
1.05497	1.12634	79.6154	43.7594	43004	27000	82.7	40.6015	103.874	92.7835
1.09404	1.12406	83.2317	20.442	31829	3158	97.0396	17.4475	116.59	85.3513
1.19093	1.14607	81.9149	53.0015	63637	34249	96.7128	50.145	118.065	94.6105
1.09015	1.13023	87.8906	25.1682	48476	16195	94.6797	21.7968	107.724	86.6043
1.13433	1.14929	76.9976	65.643	35866	36134	86.8426	69.3551	112.786	105.655
1.11962	1.17912	68.3625	7.48663	47752	2493	75.9173	6.66578	111.051	89.0357
1.09804	1.15816	84.375	66.1431	61465	73824	96.0391	64.4189	113.824	97.3931
1.18674	1.18327	87.6344	55.1724	16862	23498	90.6559	50.6422	103.448	91.7891
1.21562	1.11118	88.9024	41.6544	85634	26203	104.432	38.7046	117.468	92.9184
1.15339	1.09964	87.0968	0	53063	0	100.689	0	115.606	0
1.09616	1.09996	93.7143	56.3976	50454	57990	96.1029	57.0768	102.549	101.204
1.11617	1.02959	87.8173	41.6185	54882	7033	92.8629	40.6532	105.746	97.6806
1.1402	1.1364	80.64	79.4171	58823	49730	94.1168	90.5829	116.712	114.06
1.14501	1.09915	59.1418	39.1398	33459	16281	62.4235	35.0129	105.549	89.4561
1.06613	1.25878	86.4717	78.0488	57265	55611	104.689	90.4244	121.068	115.856
1.10462	1.22276	54.4355	75.6757	26981	44437	54.3972	85.7857	99.9296	113.36
1.12274	1.1318	87.5676	59.6349	40749	28872	110.132	58.5639	125.769	98.2041
1.14073	1.11522	79.7513	88.5437	49732	55408	88.3339	107.588	110.762	121.509
1.12809	1.1082	80.3279	88.3436	30417	33136	99.7279	101.644	124.151	115.056
1.09695	1.11743	85.5967	76.673	45421	83540	93.4588	79.8662	109.185	104.165
1.11721	1.10942	89.9696	16.187	32207	4218	97.8936	15.1727	108.807	93.7333
1.16419	1.11759	79.2812	45.0249	38134	17412	80.6216	43.3134	101.691	96.1989
1.1392	1.19407	57.6642	19.1489	23423	7622	56.9903	16.217	98.8312	84.6889
1.22491	1.18315	76.1792	63.9004	30250	47934	71.3443	66.2987	93.6532	103.753
1.11008	1.13315	49.4565	67.4541	16954	29144	46.0707	76.4934	93.1539	113.401
1.09411	1.10805	50.2451	65.9847	21276	28092	52.1471	71.8465	103.785	108.884
1.13472	1.13479	81.5825	62.6087	63134	37335	86.131	64.9304	105.575	103.708
1.1663	1.16767	58.2173	80.2789	19943	41927	55.5515	83.5199	95.421	104.037
1.11278	1.10552	62.7341	92.766	33546	32854	62.8202	139.804	100.137	150.706
1.23728	1.09015	22.3947	63.5294	9173	40972	20.3392	68.8605	90.8218	108.391
1.16429	1.1085	75.5943	39.0511	95563	12351	75.7235	45.0766	100.171	115.43
1.18777	1.0983	70.4433	40.6122	27764	19059	68.3842	38.8959	97.0769	95.7739
1.12276	1.14189	77.0161	20.2151	39601	8072	79.8407	17.3591	103.668	85.8723
1.10269	1.1206	63.9081	69.8925	25196	22490	57.9218	80.6093	90.6331	115.333
1.15284	1.16914	43.23	48.866	22735	45321	37.0881	46.7227	85.7925	95.6139
1.17568	1.11516	68.9214	40.1709	38808	14539	70.947	41.4216	102.939	103.114
1.06833	1.16018	75.9857	25	43396	13773	77.7706	22.803	102.349	91.2119
1.07271	1.198	26.5432	87.9032	10949	39111	22.5288	105.137	84.876	119.606
1.17102	1.24368	59.5833	86.3551	39387	53669	54.7042	100.316	91.8112	116.167
1.17887	1.06201	54.2895	92.3469	38806	66664	52.0188	113.374	95.8173	122.77
1.11255	1.17568	62.9295	95.0388	34932	76905	63.1682	119.233	100.379	125.457
1.13192	1.11626	35.8757	93.4694	23183	53048	32.7443	108.261	91.2716	115.825
1.17306	1.14874	70.2273	56.8421	33599	51449	76.3614	60.1743	108.735	105.862
1.17358	1.12691	71.0078	63.4561	43284	22784	67.107	64.5439	94.5066	101.714
1.14524	1.09406	57.5087	66.6305	46969	62792	54.6787	68.0303	95.079	102.101
1.15437	1.15432	70.1643	70.1807	58818	24000	74.359	72.2892	105.978	103.004
1.19187	1.14414	77.5281	74.4554	19628	41636	73.5131	82.4475	94.8213	110.734
1.15597	1.10347	16.2996	87.8122	3698	97187	16.2907	97.0899	99.9459	110.565
1.32981	1.09301	68.9655	61.5304	32604	63172	66.1339	66.218	95.8941	107.618
1.09555	1.13388	45.7547	74.07	8974	73473	42.3302	80.3862	92.5155	108.527
1.15105	1.17727	52.9496	89.404	34962	66886	50.305	110.738	95.0054	123.863
1.18006	1.15635	48.5555	88.4532	48062	105331	44.7922	114.74	92.2495	129.718
1.16003	1.04963	27.9412	94.8837	5271	26662	25.8382	124.009	92.4737	130.696
1.19844	1.15386	45.4545	94.3885	12722	79402	42.835	114.248	94.237	121.04
1.18782	1.14931	41.8712	51.5022	24966	23794	38.2914	51.0601	91.4506	99.1417
1.15597	1.08231	62.6866	96.3441	16776	70699	62.597	152.041	99.8571	157.81
1.05797	1.12442	72.5352	95.0355	10763	126187	75.7958	127.849	104.495	134.528
1.11185	1.15545	32.718	87.4902	28729	120817	29.4656	95.0567	90.0596	108.648
1.10464	1.14337	36.1963	77.4194	21708	40980	33.2945	88.129	91.9831	113.833
1.0821	1.11683	16.9491	95.941	5036	30492	14.226	112.517	83.9333	117.277
1.1349	1.07078	41.1168	74.8762	22167	66414	37.5076	82.1955	91.2222	109.775
1.14323	1.16983	39.9485	63.591	14246	28107	36.7165	70.0923	91.9097	110.224
1.16985	1.14948	26.5151	57.1852	3705	41042	28.0682	60.803	105.857	106.326
1.19236	1.16463	42.468	78.3117	24238	67526	38.843	87.6961	91.4642	111.983
1.18123	1.21626	10.3113	90.1409	4726	25738	9.19455	120.836	89.1698	134.052
1.13042	1.19969	38.3886	78.2271	15467	55162	36.6517	85.7885	95.4753	109.666
1.31433	1.15366	24.6998	81.1881	12154	59476	20.8473	98.1452	84.4028	120.886
1.16742	1.22508	34.0551	90.9924	15092	80317	29.7087	122.621	87.237	134.76
1.13995	1.0914	25.0501	76.7554	10482	35055	21.006	84.8789	83.856	110.584
1.20346	1.11078	9.4431	69.3878	3239	20678	7.84262	84.4	83.0513	121.635
1.14691	1.13163	16.6003	88.3234	10600	78473	14.077	117.475	84.8	133.005
1.13804	1.13793	2.60663	88.5714	936	49356	2.21801	100.727	85.0909	113.724
1.15685	1.13673	5.06329	42.2764	3029	10113	4.2602	41.1098	84.1389	97.2404
1.11539	1.10795	31.6715	89.1566	10085	34040	29.5748	102.53	93.3796	115
1.16026	1.10995	6.57194	81.0662	3115	54841	5.53286	100.811	84.1892	124.356
1.15073	1.18289	3.25203	88.0473	991	84731	2.68564	100.273	82.5833	113.886
1.16542	1.23368	33.8384	62.5	12175	39096	30.7449	59.5976	90.8582	95.3561
1.1273	1.14476	20.178	79.4251	6111	62154	18.1335	94.0303	89.8676	118.389
1.11911	1.10289	28.1795	90.1724	9634	59009	24.0249	101.74	85.2566	112.828
1.13112	1.11381	25.8228	96.8491	8826	81037	22.3443	134.39	86.5294	138.762
1.15048	1.12542	6.68605	92.5926	1808	66159	5.25581	128.965	78.6087	139.282
1.1447	1.14296	49.1135	95.3878	25523	52837	45.2535	110.769	92.1408	116.125
1.22202	1.10691	18.2456	92.9592	4719	114364	16.5579	116.698	90.75	125.537
1.13922	1.20099	43.1604	88.6179	17306	81532	40.816	110.477	94.5683	124.667
1.19203	1.1568	8.12808	83.5804	3030	79687	7.46305	90.8632	91.8182	108.713
1.11686	1.13592	5.35714	70.0893	1654	18705	4.21939	83.5045	78.7619	119.14
1.22622	1.14926	51.8349	68.0045	21524	68497	49.367	76.3623	95.2389	112.29
1.15019	1.12363	32.8849	86.9452	19492	43383	29.136	113.272	88.6	130.279
1.14472	1.15549	22.1894	92.645	6877	74427	20.3462	105.272	91.6933	113.629
1.16828	1.23151	23.6791	84.0362	20979	103091	20.5274	103.505	86.6901	123.167
1.17905	1.16208	22.734	84.7403	13253	35291	19.6924	114.581	86.6209	135.215
1.17139	1.16735	16.7513	83.7607	8248	85808	13.956	91.6752	83.3131	109.449
1.13847	1.12298	36.3985	83.1202	8207	36695	31.4444	93.8491	86.3895	112.908
1.08742	1.17199	12.766	67.8571	3477	57384	10.5684	78.8242	82.7857	116.162
1.14402	1.14642	25.2087	50.3326	13082	25598	21.8397	56.7583	86.6358	112.766
1.19726	1.21141	37.5	55.1876	5095	24963	33.5197	55.106	89.386	99.852
1.16979	1.04104	14.1361	53.0151	9377	20884	12.2736	52.4724	86.8241	98.9763
1.08625	1.1492	57.1885	42.9553	17400	13092	55.5911	44.9897	97.2067	104.736
1.18729	1.17558	38.8298	64.1414	20225	29027	35.8599	73.3005	92.3516	114.279
1.12245	1.17372	40.4181	70.0554	11121	40515	38.7491	74.8891	95.8707	106.9
1.08364	1.23247	40	66.2971	8217	34511	35.7261	76.5211	89.3152	115.421
1.10758	1.16197	25.1224	59.8684	13164	38696	21.4747	63.6447	85.4805	106.308
1.15322	1.15855	14.5648	50.2439	7063	25751	12.5453	62.8073	86.1342	125.005
1.12015	1.1014	6.18102	81.579	2276	34327	5.02428	100.371	81.2857	123.036
1.07034	1.12193	17.6913	93.1298	12628	62237	15.8444	118.773	89.5603	127.535
1.15449	1.20405	17.8707	81.5534	8131	28362	15.4582	91.7864	86.5	112.548
1.14498	1.18357	0.634921	71.9764	354	51053	0.561905	75.2994	88.5	104.617
1.16127	1.12488	40.7801	84.4098	11227	40868	39.8121	91.02	97.6261	107.831
1.14871	1.19272	28.9557	38.4308	16650	28566	26.3449	37.9867	90.9836	98.8443
1.33303	1.12951	20.3226	49.4058	5273	32204	17.0097	54.6757	83.6984	110.667
1.14973	1.17367	31.5202	27.193	21287	13725	29.689	24.0789	94.1903	88.5484
1.1562	1.1372	38.9058	57.7236	23184	29011	35.234	58.9654	90.5625	102.151
1.11115	1.18201	35.2313	76.8317	8885	41912	31.6192	82.9941	89.7475	108.021
1.15134	1.11674	17.6	93.3786	3699	78261	14.796	132.871	84.0682	142.293
1.15123	1.11583	33.8109	81.3264	20478	54346	29.3381	94.8447	86.7712	116.622
1.12492	1.26287	41.4383	23.348	10566	5493	36.1849	24.1982	87.3223	103.641
1.08605	1.07528	14.0741	84.1808	3174	53444	11.7556	100.648	83.5263	119.561
1.09728	1.25163	35.7281	53.6145	16131	36131	31.3223	54.4142	87.6685	101.492
1.1203	1.12454	47.2033	56.4547	30016	29494	40.9495	56.8285	86.7514	100.662
1.03963	1.14439	21.5116	66.787	3328	54966	19.3488	66.1444	89.9459	99.0378
1.11425	1.1714	22.3022	74.4966	2722	28236	19.5827	94.7517	87.8064	127.189
1.12152	1.07455	25.463	76.8786	9779	48818	22.6366	70.5462	88.9	91.7632
1.13517	1.1593	14.4309	69.5473	5998	20554	12.1911	84.5844	84.4789	121.621
1.1379	1.10665	28.8344	51.38	11980	23741	24.499	50.4055	84.9645	98.1033
1.08711	1.10266	19.3966	93.7198	7656	46907	16.5	113.302	85.0667	120.894
1.12068	1.12189	33.8816	71.6792	8927	58848	29.3651	73.7444	86.6699	102.881
1.13637	1.13234	16.8142	65.2661	8109	24899	14.3522	69.7451	85.3579	106.863
1.15377	1.09737	6.49895	71.1726	2476	44005	5.19078	71.6694	79.871	100.698
1.07218	1.15617	47.7876	50.9859	20479	34429	45.3075	48.4915	94.8102	95.1077
1.08044	1.14043	60.3509	67.4134	15751	34702	55.2667	70.6762	91.5756	104.84
1.09956	1.18588	27.8499	86.1111	17802	30591	25.6883	94.4167	92.2383	109.645
1.11812	1.08639	29.5455	72.2222	4484	59608	25.4773	80.7696	86.2308	111.835
1.14726	1.13537	19.7368	66.1386	12475	32211	18.2383	63.7842	92.4074	96.4401
1.05578	1.13425	22.7528	68.2171	7095	48067	19.9298	74.5225	87.5926	109.243
1.15386	1.08154	7.01754	50.7463	3613	18757	5.76236	55.9911	82.1136	110.335
1.1321	1.10567	8.97436	74.4253	3437	53561	7.34402	76.9555	81.8333	103.4
1.10886	1.1309	6.68058	67.4721	2612	38259	5.45303	71.1134	81.625	105.397
1.12788	1.08971	2.09974	36.036	657	16256	1.72441	36.6126	82.125	101.6
1.08929	1.14225	63.1707	52.9771	26415	31951	64.4268	48.7801	101.988	92.0778
1.14761	1.17251	11.2676	67.6267	6971	64986	9.81831	74.8687	87.1375	110.709
	1.09999		66.1119		45937		69.4962		105.119
	1.15396		52.0737		34808		53.4685		102.678
	1.14826		73.2394		37295		75.0402		102.459
	1.12439		50.4739		21473		50.8839		100.812
	1.09096		51.1482		22941		47.8935		93.6367
	1.10773		54.5198		38230		53.9972		99.0414
	1.19027		0.46083		80		0.368664		80
	1.27054		11.4537		6827		10.025		87.5256
	1.13755		59.0476		18207		57.8		97.8871
	1.10415		38.8007		19661		34.6755		89.3682
	1.18535		32.1397		32538		28.4175		88.4185
	1.1508		48.1728		26834		44.5748		92.531
	1.10343		33.6756		15602		32.037		95.1342
	1.15705		50.875		39594		49.4925		97.2826
	1.0454		49.7126		16190		46.523		93.5838
	1.1625		48.4412		20103		48.2086		99.5198
	1.15644		72.0745		27248		72.4681		100.546
	1.15834		41.6404		26172		41.2808		99.1364
	1.09152		21.8579		4060		22.1858		101.5
	1.10381		64.252		38210		60.1732		93.652
	1.16728		51.9591		30091		51.2623		98.659
	1.09894		12.9555		5852		11.8461		91.4375
	1.15969		35.8804		10121		33.6246		93.713
	1.14829		36.5011		15613		33.7214		92.3846
	1.12715		15.8242		6168		13.556		85.6667
	1.14769		55.4744		13373		48.8066		87.9803
	1.13707		45.098		34933		40.2918		89.3427
	1.11734		41.8675		12128		36.5301		87.2518
	1.1065		47.7032		12553		44.3569		92.9852
	1.06491		48.3516		15102		41.489		85.8068
	1.17252		31.4236		15453		26.8281		85.3757
	1.05091		60.7717		19000		61.0932		100.529
	1.10187		55.8411		47211		55.153		98.7678
	1.09163		26.4808		12996		22.6411		85.5
	1.19022		61.8243		33102		55.9155		90.4426
	1.09259		53.322		28546		48.6303		91.2013
	1.18316		52.2727		16205		46.0369		88.0707
	1.09472		50.8349		25130		46.6234		91.7153
	1.17426		44.2724		26486		41		92.6084
	1.11002		51.8375		25829		49.9594		96.3769
	1.16094		61.0433		53077		58.909		96.5036
	1.15898		16.8239		9058		14.2421		84.6542
	1.16532		56.7867		21180		58.6704		103.317
	1.24737		55.0595		34166		50.8423		92.3405
	1.10874		44.4043		22857		41.2581		92.9146
	1.11911		53.4541		45541		51.5753		96.4852
	1.08934		49.0196		17535		42.9779		87.675
	1.2159		41.0876		11997		36.2447		88.2132
	1.19827		39.374		21413		35.2768		89.5941
	1.1518		45.0877		22420		39.3333		87.2374
	1.13203		19.7411		10327		16.7104		84.6475
	1.16935		39.0192		33792		36.0256		92.3279
	1.1208		44.8207		21999		43.8227		97.7733
	1.21806		54.9296		21943		51.5094		93.7735
	1.07185		31.1111		16340		27.9316		89.7802
	1.12448		61.2216		38793		55.1037		90.007
	1.08606		71.7675		58166		68.9988		96.1422
	1.24414		67.4157		22298		62.6348		92.9083
	1.18522		38.2429		12893		33.3152		87.1149
	1.14188		49.5183		22662		43.6647		88.179

## Sheet: F (VAV2)
interface linearity index		interface occupancy		E-cadherin intensity		E-cadherin intensity per interface area		cluster density
control	VAV2	control	VAV2	control	VAV2	control	VAV2	control	VAV2
1.129	1.13672	26.988	35.4639	8470	14446	20.4096	29.7856	75.625	83.9884
1.17252	1.27209	56.9024	44.7887	26510	12309	44.6296	34.6732	78.432	77.4151
1.09239	1.1611	40.7895	16.5714	15872	6217	29.8346	11.8419	73.1429	71.4598
1.11242	1.08645	72.7273	35.7303	24424	11473	58.4306	25.782	80.3421	72.1572
1.08858	1.02798	7.91367	14.3969	2920	2810	5.2518	10.9338	66.3636	75.9459
1.11023	1.09245	21.5385	72.2689	3848	23509	14.8	65.8515	68.7143	91.1202
1.05644	1.08735	19.2308	80.9524	9150	29118	13.0342	77.0318	67.7778	95.1569
1.10066	1.06693	12.6316	76.7281	4819	31718	8.45439	73.0829	66.9306	95.2493
1.11801	1.11475	28.6344	21.6346	18880	3391	20.793	16.3029	72.6154	75.3555
1.09642	1.12893	50.0754	56.9643	27290	23881	41.1614	42.6446	82.1988	74.8621
1.06716	1.096	44.1913	77.3791	16052	40613	36.5649	63.3588	82.7423	81.8811
1.06909	1.1846	33.6538	81.5929	7190	44413	23.0449	78.6071	68.4762	96.3406
1.08809	1.02435	4.4898	80.1471	1565	23194	3.19388	85.2721	71.1364	106.394
1.1534	1.10972	51.0324	84.3462	12254	41402	36.1475	76.2468	70.8324	90.3974
1.0529	1.18002	62.3978	71.5402	20898	52640	56.9428	58.75	91.2576	82.1217
1.11706	1.13337	49.2355	41.6318	11887	15930	36.3517	33.3264	73.8323	80.0503
1.08762	1.07715	61.2069	44.3478	28312	8356	48.8138	36.3304	79.7521	81.9216
1.06604	1.13668	53.3528	27.6639	16399	10986	47.8105	22.5123	89.612	81.3778
1.15878	1.16635	67.706	38.0645	24423	9142	54.3942	29.4903	80.3388	77.4746
1.02669	1.12201	36.3002	71.6247	14760	23156	25.7592	52.9886	70.9615	73.9808
1.08588	1.1255	41.3235	89.3333	21423	21029	31.5044	70.0967	76.2384	78.4664
1.12809	1.15889	46.4539	74.3363	10437	44891	37.0106	56.7522	79.6718	76.3452
1.11868	1.11617	76.7365	50.469	60568	20414	66.7784	38.3002	87.023	75.8885
1.14739	1.11594	55.2553	58.9431	30476	11052	45.7598	44.9268	82.8152	76.2207
1.06353	1.14371	5.07614	61.8557	690	26729	3.50254	55.1113	69	89.0967
1.11004	1.13136	52.5661	58.2051	26889	17086	41.818	43.8103	79.5533	75.2687
1.02152	1.07375	42.723	21.4286	14910	3178	35	16.2143	81.9231	75.6667
1.07685	1.10338	19.7802	77.8495	3957	68961	14.4945	74.1516	73.2778	95.25
1.08757	1.1162	80.6754	73.8019	37074	21914	69.5572	70.0128	86.2186	94.8658
1.12502	1.04967	57.1754	82.8892	21479	53100	48.9271	74.4741	85.5737	89.8477
1.08926	1.13435	62.6777	61.0837	45316	30693	53.6919	50.399	85.6635	82.5081
1.11688	1.07224	51.7308	89.0792	21193	48798	40.7558	104.493	78.7844	117.303
1.10809	1.139	23.775	82.7586	9957	56921	18.0708	85.3388	76.0076	103.118
1.10554	1.11308	58.2809	60.3774	23990	18985	50.2935	51.1725	86.295	84.7545
1.06181	1.06004	41.2587	43.8563	9382	17026	32.8042	32.1853	79.5085	73.3879
1.06844	1.13403	57.1429	51.8333	23868	25151	45.4629	41.9183	79.56	80.8714
1.19939	1.09946	71.7149	48.2927	27410	23380	61.0468	38.0163	85.1242	78.7205
1.07054	1.12318	5.65217	43.6842	872	18322	3.7913	32.1439	67.0769	73.5823
1.08721	1.13995	49.7326	71.5431	16114	29130	43.0856	58.3768	86.6344	81.5966
1.13677	1.07888	60.3858	63.8636	31793	21897	47.1706	49.7659	78.1155	77.9253
1.06815	1.14568	60.6362	36.0294	25192	14830	50.0835	27.261	82.5967	75.6633
1.09242	1.05196	50	8.29268	17528	1214	45.6458	5.92195	91.2917	71.4118
1.20059	1.10578	23.0397	41.4013	18431	10796	17.8422	34.3822	77.4412	83.0461
1.09251	1.0706	48.6514	33.195	41916	5968	41.8741	24.7635	86.0698	74.6
1.09031	1.12956	35.4839	44.8845	15176	10185	25.7657	33.6139	72.6124	74.8897
1.11213	1.09051	24.7706	36.1446	4174	11534	19.1468	27.7928	77.2963	76.8933
1.1814	1.09979	17.9969	24.359	7730	4123	12.097	17.6197	67.2174	72.3333
1.06181	1.09302	43.5764	18.3761	19573	3179	33.9809	13.5855	77.9801	73.9302
1.13393	1.20494	31.4	11.2903	12553	2026	25.106	8.16935	79.9554	72.3571
1.14628	1.09421	58.3333	39.267	17623	10895	45.8932	28.5209	78.6741	72.6333
1.10823	1.08089	57.9228	11.3122	34594	3771	46.0639	8.53167	79.5264	75.42
1.12544	1.11509	62.3404	49.8055	25329	10299	53.8915	40.0739	86.4471	80.4609
1.10009	1.08845	13.5531	24.9535	5118	9662	9.37363	17.9926	69.1622	72.1045
1.08319	1.06717	48.3254	93.9068	24695	65381	39.386	117.17	81.5016	124.773
1.10954	1.11745	33.6474	87.6522	18230	51846	24.5357	90.1669	72.92	102.869
1.14032	1.15188	61.3095	88.2023	43668	34449	51.9857	96.7669	84.7922	109.71
1.05344	1.12343	44.1861	93.3674	15693	22054	36.4954	112.52	82.5947	120.514
1.13155	1.15502	66.375	87.8261	46580	62199	58.225	90.1435	87.7213	102.639
1.1643	1.07142	68.107	86.5801	56445	21874	58.071	94.6926	85.2643	109.37
1.10761	1.13264	62.4221	71.1027	55633	20071	49.5396	76.3156	79.3623	107.332
1.12201	1.15339	55.6765	69.9858	29728	49645	46.2333	70.6188	83.0391	100.904
1.04737	1.11246	45.1557	65.861	18279	21288	31.6246	64.3142	70.0345	97.6514
1.12138	1.11008	23.8235	69.5652	18557	33060	18.1931	75.6522	76.3663	108.75
1.14387	1.04012	21.9799	71.7842	10957	16154	18.3842	67.029	83.6412	93.3757
1.17186	1.16337	16.9355	84.3173	6764	45822	13.6371	84.5424	80.5238	100.267
1.0702	1.1138	13.1234	75.6824	4092	33095	10.7402	82.1216	81.84	108.508
1.13149	1.15504	38.0208	34.4086	16913	9498	29.3629	25.5323	77.2283	74.2031
1.15443	1.0907	23.5358	40.6593	15817	9114	17.1551	33.3846	72.8894	82.1081
1.16718	1.19006	21.9512	69.9374	4116	31544	16.7317	65.8539	76.2222	94.1612
1.13701	1.06323	51.1204	64.8585	28694	25059	40.1877	59.1014	78.6137	91.1236
1.20313	1.09162	27.3551	54.1219	11560	13339	20.942	47.81	76.5563	88.3377
1.0985	1.11793	65.5844	37.0607	32347	10011	52.5114	31.984	80.0668	86.3017
1.06944	1.07315	64.4391	72.1617	22052	45566	52.6301	70.8647	81.6741	98.2026
1.14804	1.10436	40.3927	70.6667	20660	38052	28.9762	72.48	71.7361	102.566
1.13646	1.05713	63.8621	5.37634	40410	659	55.7379	3.54301	87.2786	65.9
1.14585	1.12917	68.9405	22.7586	39364	8313	57.1321	19.1104	82.8716	83.9697
1.12451	1.04383	72.8261	87.0629	48433	45596	65.8057	79.7133	90.3601	91.5582
1.06909	1.15389	58.9744	55.4656	16973	12808	54.4006	51.8543	92.2446	93.4891
1.12559	1.04365	74.8792	55.5102	27074	11672	65.3961	47.6408	87.3355	85.8235
1.04566	1.16538	61.6993	84.3137	42061	54990	54.9817	89.8529	89.1123	106.57
1.05038	1.01245	68.0761	60.3175	27552	8807	58.2495	46.5979	85.5652	77.2544
1.21727	1.11075	20.1527	58.7912	9875	19175	15.0763	52.6786	74.8106	89.6028
1.0945	1.09818	32.1149	47.9675	9270	20439	24.2037	41.5427	75.3658	86.6059
1.07559	1.08051	35.8621	37.8378	14959	17750	25.7914	36.9023	71.9183	97.5275
1.08034	1.17739	58.8489	73.6928	34465	42024	49.5899	68.6667	84.2665	93.1796
1.14566	1.08553	16.8717	94.3925	6695	79414	11.7663	123.698	69.7396	131.046
1.0723	1.1105	43.3702	88.8073	24678	49471	34.0856	90.7725	78.5923	102.213
1.10824	1.12435	30.7292	88.8707	4473	60039	23.2969	98.2635	75.8136	110.569
1.10842	1.13241	54.4218	86.9718	19964	57530	45.2698	101.285	83.1833	116.457
1.06739	1.05058	65.2336	82.8851	30715	34697	57.4112	84.8337	88.0086	102.351
1.12242	1.10501	78.9677	88.4164	47185	61337	60.8839	89.9369	77.0997	101.72
1.22508	1.07399	16.8675	87.9032	11560	21874	11.6064	88.2016	68.8095	100.339
1.1115	1.12332	56.8941	84.6667	31165	48790	45.2322	81.3167	79.5025	96.0433
1.04136	1.13816	6.77083	83.7413	3000	45982	5.20833	80.3881	76.9231	95.9958
1.12093	1.10388	31.2354	88.5918	9846	48798	22.951	86.984	73.4776	98.1851
1.15917	1.11383	45.0111	94.5017	14791	26834	32.796	92.2131	72.8621	97.5782
1.07114	1.09481	32.9412	83.0952	4191	38196	24.6529	90.9429	74.8393	109.444
1.21261	1.17985	17.0068	75.2914	8274	35098	11.2571	81.8135	66.192	108.662
1.11061	1.09662	62.3169	89.0566	36071	21146	48.0306	79.7962	77.0748	89.6017
1.13785	1.08972	45.1098	94.4898	17189	45815	34.3094	93.5	76.0575	98.9525
1.13845	1.12887	8.39329	92.8803	4938	29078	5.92086	94.1036	70.5429	101.317
1.1889	1.04223	33.3333	100	16981	20630	25.7288	127.346	77.1864	127.346
1.05077	1.13827	5.71429	91.3043	778	66258	3.70476	99.3373	64.8333	108.798
1.09738	1.13557	51.0769	84.701	26237	59313	40.3646	82.4937	79.0271	97.3941
1.04554	1.13111	38.1657	78.6704	9307	27776	27.5355	76.9418	72.1473	97.8028
1.15346	1.09543	72.9412	68.6567	30786	13167	60.3647	65.5075	82.7581	95.413
1.11253	1.06473	29.3069	74.2105	10339	44032	20.4733	77.2491	69.8581	104.095
1.03274	1.07232	70	77.6471	21663	35631	60.175	83.8376	85.9643	107.973
1.06244	1.14029	95.2	71.1316	31890	32325	85.04	74.6536	89.3277	104.951
1.0827	1.12344	23.4772	46.5558	13072	17174	16.5888	40.7933	70.6595	87.6225
1.11835	1.08938	58.8571	67.5	15970	31073	45.6286	64.7354	77.5243	95.9043
1.08186	1.08866	68.3363	25.1592	32341	5849	57.8551	18.6274	84.6623	74.038
1.03465	1.04365	54.3233	66.1225	21504	15156	40.4211	61.8612	74.4083	93.5556
1.08791	1.12816	82.0339	59.276	18414	20802	62.4203	47.0633	76.0909	79.397
1.08802	1.17751	33.0745	25.9414	16105	5332	25.0078	22.3096	75.6103	86
1.08762	1.11364	64.7887	6.16438	18387	1284	51.7944	4.39726	79.9435	71.3333
1.11224	1.15542	25.7618	27.3458	12822	7635	17.759	20.4692	68.9355	74.8529
1.07318	1.07823	24.3276	18.7328	13904	5038	16.9976	13.8788	69.8693	74.0882
1.13862	1.08472	6.87831	33.5463	883	9358	4.67196	29.8978	67.9231	89.1238
1.13455	1.07394	36.9502	39.9504	9231	13539	27.0704	33.5955	73.2619	84.0932
1.15866	1.06545	64.275	33.5052	72781	13553	54.3954	23.2869	84.6291	69.5026
1.19972	1.06777	52.0408	56.0166	7179	11402	36.6275	47.3112	70.3824	84.4593
1.07967	1.14419	87.7551	54.0835	14475	24730	73.852	44.882	84.157	82.9866
1.11227	1.0592	98.5795	91.3989	68324	92115	97.0511	87.0652	98.4496	95.2585
1.13133	1.11355	92.3188	55.2083	64037	16980	92.8072	44.2188	100.529	80.0943
1.08569	1.12496	93.5702	61.7486	52697	37098	89.1658	50.6803	95.293	82.0752
1.04909	1.10686	92.9578	72.1154	23374	29469	82.3028	56.6711	88.5379	78.584
1.08124	1.12338	99.0632	82.2222	37671	23816	88.2225	66.1556	89.0567	80.4595
1.08444	1.11371	95.4911	80.8184	52395	33061	84.372	84.555	88.3558	104.623
1.09355	1.14916	98.6842	58.6449	37379	22456	98.3658	52.4673	99.6773	89.4661
1.06536	1.05236	99.473	84.1041	63813	33806	84.0751	97.7052	84.5205	116.172
1.10653	1.16183	93.5223	48.6413	19026	14011	77.0283	38.0734	82.3636	78.2737
1.11343	1.04954	58.0042	64.6484	21303	29469	44.289	57.5566	76.3548	89.0302
1.05449	1.13685	58.9744	85.413	8316	49748	42.6461	87.4306	72.313	102.362
1.19755	1.03384	93.7768	85.2941	36486	34497	78.2961	92.238	83.492	108.141
1.17127	1.14874	78.8644	52.6316	17985	20277	56.735	44.4671	71.94	84.4875
1.10438	1.14155	54.6748	48.5887	22925	18777	46.5955	37.8569	85.2231	77.9129
1.06136	1.11578	92.9664	22.5064	30419	6680	93.0245	17.0844	100.062	75.9091
1.03412	1.12664	96.088	47.2464	34495	27093	84.3398	39.2652	87.7735	83.1074
1.09276	1.16974	97.6744	53.1365	42422	11205	98.6558	41.3469	101.005	77.8125
1.11432	1.09677	61.7284	62.807	10557	14907	43.4444	52.3053	70.38	83.2793
1.0661	1.17235	95.1456	70.7535	38067	46076	92.3956	58.8455	97.1097	83.1697
1.12446	1.0706	90.0662	39.8892	22361	11656	74.043	32.2881	82.2096	80.9444
1.15136	1.03884	97.9351	12.4402	28999	3749	85.5428	8.9689	87.3464	72.0961
1.06693	1.06067	99.3548	38.156	14977	21099	96.6258	29.9277	97.2532	78.4349
1.07164	1.14102	96.1539	31.7406	57814	14593	82.3561	24.9027	85.6504	78.457
1.14105	1.13288	97.929	12.2066	36735	1934	108.683	9.07981	110.982	74.3846
1.03555	1.13129	81.4925	32.0069	24629	14329	73.5194	24.7907	90.2161	77.4541
1.14603	1.14665	83.9367	38.4401	31255	9940	70.7127	27.688	84.2453	72.029
1.07882	1.13775	95.3629	44	41803	14537	84.2802	32.3044	88.3784	73.4192
1.11785	1.10943	95.7983	73.3645	44404	23340	93.2857	54.5327	97.3772	74.3312
1.11496	1.11008	99.5671	65.8009	21037	13338	91.0693	57.7403	91.4652	87.75
1.09604	1.07634	87.6818	20.8955	95445	6942	81.6467	17.2687	93.1171	82.6429
1.17373	1.16371	74.3875	51.0264	31225	14595	69.5434	42.8006	93.488	83.8793
1.07073	1.12535	4.04762	29.6703	1078	14365	2.56667	22.551	63.4118	76.0053
1.13001	1.06078	77.0604	29.5374	51592	6390	70.8681	22.7402	91.9643	76.9879
1.12838	1.11375	45.702	92.1502	26332	51906	37.7249	88.5768	82.5455	96.1222
1.05232	1.11881	77.4854	78.0769	21668	34221	63.3567	65.8096	81.766	84.2882
1.10257	1.16879	22.6496	87.7834	7187	59519	15.3568	74.961	67.8019	85.3931
1.07622	1.18009	80.6378	78.9394	29653	47108	67.5467	71.3758	83.7655	90.4184
1.08734	1.08769	61.1465	81.3889	13455	53685	42.8503	74.5625	70.0781	91.6126
1.09112	1.02946	77.095	68.6131	21984	14190	61.4078	51.7883	79.6522	75.4787
1.09389	1.09914	16.2577	76.738	4210	23353	12.9141	62.4412	79.434	81.3693
1.07597	1.04788	92.5373	41.2121	24589	14686	73.4	29.6687	79.3194	71.9902
1.05745	1.10389	91.3043	68.0672	26189	13721	75.9102	57.6513	83.1397	84.6975
1.07685	1.08861	94.0678	54.2149	9216	28956	78.1017	47.8612	83.027	88.2805
1.04371	1.10371	95.842	63.871	38020	41277	79.0437	53.2606	82.4729	83.3879
1.18038	1.07343	66.2829	81.0234	31094	33618	51.1414	71.6802	77.1563	88.4684
1.18118	1.16969	13.1105	58.7719	3467	33374	8.9126	48.7924	67.9804	83.0199
1.15398	1.1147	1.14942	41.6382	183	9713	0.701149	33.1502	61	79.6148
1.06624	1.10092	77	49.4118	29668	23959	59.336	40.2672	77.0597	81.4932
1.16007	1.10365	87.8136	66.2069	18707	24634	67.0502	56.6299	76.3551	85.5347
1.0706	1.10576	88.7531	76.2222	28308	29582	69.2127	65.7378	77.9835	86.2449
1.03937	1.07614	91.7676	63.9687	33765	20074	81.7554	52.4125	89.0897	81.9347
1.02909	1.15236	89.9782	49.9462	30651	35887	66.7778	38.6297	74.2155	77.3427
1.14463	1.06471	93.1372	6.11111	41762	1499	81.8863	4.16389	87.92	68.1364
1.05749	1.08833	50.8824	39.4428	12140	20800	35.7059	30.4985	70.1734	77.3234
1.10102	1.14042	72.2892	60.5263	17910	43733	53.9458	50.0378	74.625	82.6711
1.07906	1.13441	82.4197	58.0046	38781	21359	73.31	49.5568	88.9472	85.436
1.09335	1.08231	61.4232	48.4375	23994	9612	44.9326	37.5469	73.1524	77.5161
1.09709	1.0922	54.6351	14.91	23479	4041	46.3097	10.3882	84.7617	69.6724
1.11199	1.13477	93.6491	21.3518	70927	10040	76.3477	15.4224	81.5253	72.2302
1.07894	1.08651	85.4214	16.5049	27903	4714	63.5604	11.4418	74.408	69.3235
1.0883	1.07753	100	51.932	36204	25522	92.5934	39.4467	92.5934	75.9583
1.10513	1.06739	99.0755	41.1268	50814	10846	78.2958	30.5521	79.0264	74.2877
1.1423	1.03587	95.6284	38.961	50150	12494	91.3479	27.0433	95.5238	69.4111
1.12709	1.09287	98.3022	48.5795	47141	13805	80.0357	39.2188	81.418	80.731
1.09414	1.3556	90.4762	51.2668	16575	27074	71.7532	40.3487	79.3062	78.7035
1.10749	1.14388	91.2399	30.0885	56699	9839	76.4137	21.7677	83.7504	72.3456
1.08114	1.01112	100	51.1962	49407	8202	93.7514	39.244	93.7514	76.6542
1.07903	1.11093	99.5012	44.4109	81471	11164	101.585	33.7281	102.094	75.9456
1.105	1.09444	94.8454	54.8165	47490	19144	81.5979	43.9083	86.0326	80.1004
1.15481	1.10662	64.8045	57.7617	28042	12806	52.2197	46.2311	80.5805	80.0375
1.23395	1.10926	76.9486	58.9666	34668	14905	57.4925	45.304	74.7155	76.8299
1.14172	1.08706	81.4159	58.8542	16012	28401	70.8496	49.3073	87.0217	83.7788
1.11848	1.09012	72.7273	40.6143	53090	8661	59.5847	29.5597	81.929	72.7815
1.05765	1.09178	63.7536	67.5532	36721	20643	52.6089	54.9016	82.5191	81.2716
1.14959	1.15437	23.9468	44.9664	7410	9692	16.4302	32.5235	68.6111	72.3284
1.131	1.05924	72.6852	56.1798	12014	8354	55.6204	46.9326	76.5223	83.54
1.10656	1.15172	89.4366	33.4507	9757	14203	68.7113	25.0053	76.8268	74.7526
1.08739	1.07609	81.6024	25.1799	20966	4928	62.2137	17.7266	76.24	70.4
1.06604	1.04788	90.146	51.0109	19744	24228	72.0584	37.6796	79.9352	73.8658
1.04761	1.15034	91.5916	57.0297	25918	22684	77.8318	44.9188	84.9771	78.7639
1.11882	1.07616	91.7826	26.1851	63213	8259	79.9153	18.6433	87.0703	71.1983
1.0558		86.7188		18589		72.6133		83.7342
1.07493		90.5367		50666		71.5622		79.0421
1.11255		83.5714		26599		63.331		75.7806
1.11618		29.023		6356		18.2644		62.9307
1.15723		98.7342		20553		86.7215		87.8333
1.10888		99.4671		50320		89.3783		89.8571
1.08574		98.9886		65954		83.3805		84.2324
1.15768		86.4362		23848		63.4255		73.3785
1.13104		99.8198		53337		96.1027		96.2762
1.04365		100		15397		76.602		76.602
1.1393		100		59785		95.9631		95.9631
1.11724		100		29225		77.5199		77.5199
1.11519		100		66373		89.5722		89.5722
1.18981		100		86089		93.7789		93.7789
1.05648		86.3501		25461		75.5519		87.4948
1.09708		72.5724		39094		66.5997		91.7699
1.11793		94.2073		24391		74.3628		78.9353
1.04853		86.0534		23176		68.7715		79.9172
1.09162		95.8042		40764		95.021		99.1825
1.03731		89.9705		27910		82.3304		91.5082
1.09573		91.6094		59034		81.2022		88.6396
1.17824		96.2857		51750		73.9286		76.7804
1.03234		65.1982		9915		43.6784		66.9932
1.08725		88.4758		16245		60.3903		68.2563
1.10042		100		30956		74.4135		74.4135
1.08859		100		51587		100.756		100.756
1.04126		100		30850		87.3938		87.3938
1.09397		100		42573		90.968		90.968
1.16396		100		78774		93.6671		93.6671
1.04792		97.0395		21049		69.2401		71.3525
1.09062		88.6423		59875		78.1658		88.1812
1.06917		65.7061		17774		51.2219		77.9561
1.07802		97.5031		73487		91.7441		94.0935
1.1268		100		61261		100.428		100.428
1.10966		98.7132		49929		91.7812		92.9776
1.09255		99.045		61639		84.0914		84.9022
1.08602		97.561		47712		72.7317		74.55
1.03163		96.9136		42207		86.8457		89.6115
1.20538		100		40187		80.8591		80.8591
1.0657		100		36124		97.1075		97.1075
1.06753		100		15024		83.933		83.933
1.1471		100		63195		87.4066		87.4066
1.16663		99.8239		41001		72.1849		72.3122
1.13193		100		39199		88.8866		88.8866
1.09091		100		40344		93.3889		93.3889
1.17492		100		74052		97.9524		97.9524
1.10537		100		64424		97.9088		97.9088
1.17442		98.6896		110041		90.1237		91.3203
1.08224		100		40254		76.6743		76.6743
1.1105		100		74452		80.0559		80.0559
1.17154		98.1752		43886		80.0839		81.5725
1.12755		98.5997		108370		89.2669		90.5347
1.1223		100		16889		83.6089		83.6089
1.11245		95.4545		29204		78.0856		81.8039
1.04426		96.8198		44788		79.1307		81.7299
1.18667		99.1266		20031		87.4716		88.2423
1.06002		97.3723		62447		91.1635		93.6237
1.13099		83.4677		17627		71.0766		85.1546
1.1318		100		93296		92.0987		92.0987
1.15177		99.6504		47137		82.4073		82.6965
1.11521		99.5885		20003		82.3169		82.657
1.09673		100		59988		90.8909		90.8909
1.16492		100		53071		92.6195		92.6195
1.12325		94.4497		98561		92.7197		98.1683
1.13111		95.7722		97071		83.7541		87.4514
1.10772		96.9811		23068		87.0491		89.7588
