# Supplementary material for: Junction Mapper is a novel computer vision tool to decipher cell–cell contact phenotypes
Source: eLife. 2019 Dec 3;8:e45413. doi: 10.7554/eLife.45413 (PMC7034980; doi:10.7554/eLife.45413)
Supplement: Figure 7—figure supplement 1—source data 1. [file elife-45413-fig7-figsupp1-data1.xlsx]

## Sheet: Explanation
Source Data S10 complementing Figure 7-figure supplement 1
Figure S10 Panel C data	C	Endothelia user A vs usere B: VE-cadherin intensity, VE-cadherin area
Figure S10 Panel D data	D	Endothelia user A vs user B: VE-cadherin area
Figure S10 Panel E data	E	Endothelia user A vs user B: VE-cadherin intensity pere interface area
Figure S10 Panel F data	F	Endothelia user A vs user B: cluster density

## Sheet: C
VE-cadherin intensity		VE-cadherin area
user A	user B	user A	user B
60270	423193	2744	5842
25068	115381	1115	1644
4680	49985	238	773
132013	761101	4386	7457
94521	586810	3144	5684
85377	426050	2823	3947
44206	183502	1893	2584
19038	114163	918	1328
206556	1110207	6608	10180
47694	336523	1368	2598
82964	477028	3026	5240
86864	574112	2768	5127
164210	979646	5371	8961
45880	337177	1316	2794
28960	172474	1047	1889
86559	562875	2551	4584
120172	707915	4459	7856
83104	559266	2593	4909
33201	214559	1097	1885
108751	708014	3084	5270
37026	247032	1215	2115
48063	311057	1323	2117
77072	495366	2143	3400
67670	473323	1834	3226
107637	758355	2974	5301
84852	534399	2588	4118
61483	412112	2269	4035
35694	234212	1271	2065
123724	749927	3811	5903
67110	385207	2476	3806
68483	496590	2413	4646
81303	596662	2416	4436
18954	167573	695	1732

## Sheet: D
user A		user B
control	thrombin	control	thrombin
2744	1097	5842	1885
1115	3084	1644	5270
238	1215	773	2115
4386	1323	7457	2117
3144	2143	5684	3400
2823	1834	3947	3226
1893	2974	2584	5301
918	2588	1328	4118
6608	2269	10180	4035
1368	1271	2598	2065
3026	3811	5240	5903
2768	2476	5127	3806
5371	2413	8961	4646
1316	2416	2794	4436
1047	695	1889	1732
2551		4584
4459		7856
2593		4909

## Sheet: E
user A		user B
control	thrombin	control	thrombin
7.12075	21.5871	34.3	98.7386
4.44784	30.5052	13.5583	121.84
0.953157	30.4741	6.43639	116.8
30.0987	36.3288	101.009	146.933
30.0639	35.9645	102.607	145.696
30.2326	36.8975	107.398	146.721
21.9276	35.559	43.6805	139.173
17.5789	31.4383	75.8558	125.593
31.2585	26.7317	108.631	101.48
34.864	28.0834	129.532	113.42
27.1568	32.465	86.7955	127.042
30.9124	16.4526	106.278	68.0578
30.5735	20.8408	107.962	79.5053
34.8632	29.9018	120.679	122.117
27.66	24.3	75.1193	93.2515
33.9314		122.764
26.9504		88.934
32.0494		113.927

## Sheet: F
user A		user B
control	thrombin	control	thrombin
21.9643	30.2653	72.4397	113.824
22.4825	35.263	70.1831	134.348
19.6639	30.4741	64.6637	116.8
30.0987	36.3288	102.065	146.933
30.0639	35.9645	103.239	145.696
30.2434	36.8975	107.943	146.721
23.3524	36.1927	71.0147	143.059
20.7386	32.7867	85.9661	129.772
31.2585	27.097	109.058	102.134
34.864	28.0834	129.532	113.42
27.417	32.465	91.0359	127.042
31.3815	27.1042	111.978	101.21
30.5735	28.3808	109.323	106.885
34.8632	33.6519	120.679	134.505
27.66	27.2719	91.3044	96.7511
33.9314		122.791
26.9504		90.1114
32.0494		113.927
