# Supplementary material for: Junction Mapper is a novel computer vision tool to decipher cell–cell contact phenotypes
Source: eLife. 2019 Dec 3;8:e45413. doi: 10.7554/eLife.45413 (PMC7034980; doi:10.7554/eLife.45413)
Supplement: Figure 7—source data 1. [file elife-45413-fig7-data1.xlsx]

## Sheet: Explanation
Source Data 7 complementing Figure 7
Figure 7 Panel B data	B	interface linearity index
Figure 7 Panel C data	C	interface occupancy
Figure 7 Panel D data	D	VE-cadherin intensity
Figure 7 Panel E data	E	VE-cadherin intensity per interface area
Figure 7 Panel F data	F	cluster density

## Sheet: B
control	thrombin
1.14353	1.12693
1.10521	1.13992
1.13703	1.08617
1.08747	1.12883
1.13587	1.16371
1.10809	1.08882
1.11492	1.15204
1.27367	1.0856
1.15416	1.19035
1.15004	1.15195
1.1222	1.30656
1.19076	1.1626
1.15997	1.2465
1.12151	1.07679
1.09201	1.12887
1.17607	1.1642
1.16143	1.12665
1.09323	1.08223
1.13983	1.08599
1.3112	1.2206
1.04883	1.15321
1.1434	1.11736
1.16072	1.44276
1.14276	1.21377
1.36628	1.06945
1.11334	1.20769
1.12999	1.20472
1.15051	1.26777
1.20407	1.19523
1.18024	1.15663
1.14012	1.21204
1.17708	1.13144
1.15607	1.18882
1.17257	1.17012
1.09825	1.10093
1.07249	1.19098
1.18597	1.093
1.10882	1.13843
1.14939	1.10451
1.17857	1.09884
1.2057	1.15007
1.09552	1.09761
1.15531	1.13735
1.08035	1.17394
1.16493	1.08338
1.11313	1.19426
1.13887	1.07376
1.18306	1.13118
1.12841	1.04047
1.13911	1.1171
1.2087	1.06416
1.16619	1.12574
1.09886	1.15054
1.18679	1.34142
1.09034	1.12305
1.11503	1.09387
1.19033	1.12232
1.13686	1.07414
1.23402	1.21152
1.07617	1.12123
1.15365	1.12498
1.20705	1.16596
1.20389	1.09023
1.19295	1.16654
1.12372	1.13449
1.13586	1.15078
1.40152	1.10816
1.14482	1.19864
1.18593	1.16856
1.20022	1.09121
1.11994	1.39206
1.11001	1.08417
1.1441	1.11733
1.1337	1.11463
1.10007	1.18654
1.13839	1.10755
1.07568	1.14672
1.14068	1.1274
1.12339	1.15957
1.21103	1.11675
1.12963	1.12259
1.12292	1.21932
1.09631	1.14375
1.16603	1.10068
1.27434	1.53987
1.12768	1.13889
1.06078	1.16286
1.14067	1.19294
1.10771	1.14807
1.19384	1.13418
1.12055	1.1286
1.09215	1.07024
1.65611	1.23567
1.23667	1.18782
1.08544	1.3018
1.13763	1.22139
1.11324	1.05351
1.24715	1.11873
1.13228	1.25122
1.17248	1.14034
1.63477	1.22624
1.12431	1.1213
1.21786	1.23626
1.19199	1.13854
1.09695	1.10255
1.12734	1.07975
1.09639	1.19024
1.10835	1.15722
1.17588	1.11675
1.11051	1.10298
1.16566	1.19078
1.09394	1.17728
1.10409	1.13975
1.17667	1.10128
1.10106	1.23525
1.13275	1.08966
1.15592	1.12278
1.12423	1.13413
1.18343	1.1558
1.10525	1.10711
1.1693	1.15873
1.05871	1.08106
1.1575	1.10027
1.16082	1.13785
1.09512	1.14756
1.14674	1.12498
1.16392	1.14637
1.10462	1.17366
1.05864	1.11213
1.08972	1.1319
1.15115	1.13147
	1.09505
	1.13038
	1.36747
	1.11325
	1.10971
	1.32369
	1.2447
	1.15382
	1.1174
	1.20929
	1.16702
	1.20074
	1.22611
	1.12554
	1.15682
	1.10335
	1.10931
	1.10693
	1.06403
	1.18202
	1.11647
	1.22735
	1.14944
	1.17169
	1.10978
	1.08344
	1.18984
	1.19326
	1.23548
	1.12923
	1.25812
	1.08217
	1.22735
	1.15631
	1.21386
	1.09657
	1.14725
	1.13823
	1.14839
	1.35133
	1.25223
	1.22193
	1.1195
	1.16365
	1.18091
	1.18466
	1.22106
	1.19481
	1.10828
	1.10504
	1.17832
	1.29309
	1.08592
	1.21419
	1.19934
	1.16628
	1.13335
	1.2022
	1.17344
	1.0878
	1.13622
	1.24535
	1.15468
	1.14053
	1.10464
	1.13978
	1.11436
	1.11606
	1.1286
	1.12699
	1.17191
	1.17655
	1.07713
	1.12415
	1.07799
	1.21063
	1.08774
	1.14919
	1.25756
	1.2673
	1.17379
	1.15855
	1.15769
	1.1063
	1.14408
	1.16553
	1.10993
	1.14751
	1.17781
	1.1237
	1.05106
	1.17349
	1.14897
	1.10807
	1.16675
	1.18993
	1.08972
	1.11472
	1.15918
	1.12903
	1.18025
	1.12215
	1.16232
	1.20274
	1.15602
	1.18602
	1.2866
	1.08191
	1.13194
	1.10935
	1.09823
	1.0947
	1.19189
	1.1069
	1.10854
	1.0935
	1.12232
	1.13362
	1.2237
	1.21106
	1.11152
	1.11308
	1.07115
	1.1281
	1.15323
	1.13384
	1.10445
	1.14677
	1.1233

## Sheet: C
control	thrombin
100	79.5673
100	96.4451
100	100
100	100
100	100
100	100
100	100
100	100
99.9646	100
84.7645	100
93.8988	87.2007
100	100
82.9384	100
100	100
98.5053	100
99.0507	98.3261
100	96.1539
69.3084	99.919
100	100
100	100
100	99.5771
100	98.6569
100	100
100	100
100	100
100	100
100	100
100	100
99.6727	100
100	96.3602
99.2645	95.9651
100	94.1411
100	100
100	97.1464
99.6102	94.8905
100	89.1975
89.3028	93.337
51.3536	72.3315
94.2572	79.0278
100	79.3502
97.4733	56.1687
95.8048	93.6422
8.35073	43.6681
26.1213	40.0485
3.01072	60.8676
19.7835	46.9552
4.84725	42.3701
32.4197	84.1689
59.778	35.5229
23.432	89.2108
16.6667	78.2294
53.0464	12.9966
57.7993	91.8504
45.4714	100
58.9382	100
70.2155	77.3723
69.0909	57.0701
29.1565	63.7965
24.1306	56.7028
37.4935	69.7511
50.0154	80.076
70.1852	100
21.5061	100
16.5322	100
20.9428	82.6319
26.5182	38.1536
33.2126	10.5502
23.6996	72.0938
28.6638	98.9398
19.6129	27.9715
13.7168	40.8127
21.1315	39.6852
61.1174	92.0026
8.85853	92.2444
48.3317	59.7071
13.5998	46.9486
11.7805	78.445
30.6306	55.4711
39.2414	99.9714
9.63671	62.6176
15.6057	100
12.0772	98.1962
17.9255	94.7822
24.0652	100
71.7057	91.2946
7.74673	97.7091
42.3032	100
20.3472	88.3784
55.9127	72.6503
58.7118	100
58.3183	54.0146
48.57	35.2397
13.3507	77.1127
37.3546	65.9611
26.5997	84.6109
5.83971	100
38.2768	62.2601
28.3527	99.9724
37.1611	100
13.0116	100
29.1558	66.8087
33.612	94.9037
57.9969	76.1216
99.7023	99.7943
40.3846	92.462
67.7453	82.8561
42.1521	90.5579
68.5906	73.1707
63.0963	99.0798
49.7866	72.5316
28.929	39.0417
1.95783	100
45.1666	86.5077
80.1099	71.3264
14.4353	100
21.0773	100
53.0013	100
42.9925	100
67.9799	98.2491
92.0591	77.3148
56.9373	86.9464
100	54.5799
82.4672	100
49.9868	100
50.7816	98.6522
76.9867	95.8874
87.3749	60.7011
43.2694	89.1026
61.326	88.8562
28.294	73.4327
89.0465	94.4985
	61.2998
	98.4046
	57.112
	26.8826
	97.1297
	50.597
	98.3791
	79.7791
	79.736
	28.1587
	69.724
	17.1269
	99.7924
	80.9862
	99.9431
	100
	57.0037
	9.87342
	91.1765
	100
	100
	100
	100
	81.4491
	100
	100
	95.0722
	100
	45.5619
	59.4879
	98.6698
	69.0238
	95.7887
	87.4544
	33.4805
	70.3322
	100
	100
	95.9494
	100
	100
	99.7696
	100
	79.7117
	100
	96.1418
	96.2162
	97.4268
	95.0037
	87.7811
	99.6577
	99.9748
	73.5378
	73.871
	90.6775
	72.3266
	85.4142
	100
	99.9441
	49.7661
	57.2152
	50.3268
	16.2426
	74.5353
	91.2573
	95.8693
	43.4629
	40.4502
	58.5548
	85.4021
	93.5127
	100
	89.3972
	49.737
	59.4945
	68.3345
	31.6397
	12.0402
	40.4975
	12.0129
	48.3298
	59.2579
	95.4068
	99.9213
	100
	100
	69.0323
	83.5412
	92.1573
	100
	90.2704
	99.026
	75.8491
	95.5808
	68.3184
	99.5975
	99.6689
	62.449
	89.1834
	23.851
	40.2185
	51.4272
	70.966
	93.7578
	76.6475
	58.1335
	94.9325
	97.5988
	28.018
	17.3607
	35.5096
	38.7522
	73.6625
	42.7151
	100
	10.4779
	27.2345
	37.7752
	46.3243
	42.14
	99.7846
	43.5464
	43.313
	69.99
	84.3229
	35.3011
	16.9392
	8.3202
	16.489

## Sheet: D
control	thrombin
28960	28424
86559	81297
58817	42409
60071	21374
120172	91434
94521	103138
132013	64135
22719	23296
85377	182024
19038	146911
44206	48391
206556	77139
72505	145749
47694	73179
86864	26067
82964	136181
43235	18847
34236	34972
173340	93605
83104	105517
45880	90130
164210	91897
87088	94537
220300	73674
51943	60417
180535	28534
52178	148340
104677	128272
76489	194251
47821	61832
226648	137812
83152	51967
124302	128264
116460	76604
127399	66630
13761	86542
20549	127822
13218	108707
112834	29116
115322	34046
168439	23359
28586	116543
8151	17426
17284	30590
3651	29035
25068	19555
4680	18657
60270	38319
69884	8776
20824	47174
8655	18537
76901	3719
26759	67327
51543	45210
14825	106569
28762	37889
50956	35432
22992	32687
21043	48272
35330	62691
41813	79894
18803	90319
6848	43926
12200	92073
12852	42584
11657	10133
22583	3702
18996	56826
9217	71246
21247	8291
10175	28243
10371	32706
52944	80466
4436	38995
24784	29390
14705	24573
10492	24548
8996	31368
12226	120746
11016	40630
16095	99216
20547	63701
8176	69381
5489	90374
28677	57306
6074	122189
8196	72534
11810	51651
126050	18600
62636	25899
27680	26593
69072	8997
13521	43330
31979	56851
29735	130051
9356	113691
12330	14435
30471	130456
47533	24735
10276	120669
36577	42822
55083	44264
127591	35770
83560	133759
43440	80282
82257	59195
43196	110592
124595	27502
51151	99156
51323	23820
22521	31928
583	36748
93650	108751
138533	33201
5457	77072
36088	37026
88583	48063
22604	67670
93301	107637
26478	19049
43437	25405
37717	14754
121653	35694
40581	123724
77182	61483
105512	84852
43051	67110
50583	18954
21322	81303
9320	68483
47188	124378
	21015
	106204
	39183
	9251
	106548
	23595
	65275
	29726
	59152
	25373
	39770
	11121
	130396
	44950
	109002
	62804
	28448
	3916
	38253
	247505
	98034
	70516
	118585
	87097
	61573
	60317
	28438
	128418
	22570
	22663
	152754
	21132
	32049
	49277
	17914
	29545
	68383
	66943
	58915
	232821
	41638
	117362
	21633
	93196
	59401
	81879
	45882
	62996
	79617
	27912
	58479
	126672
	23846
	51911
	43792
	48405
	52657
	90332
	51698
	18674
	33743
	10559
	9569
	50625
	77364
	87583
	14689
	12089
	42725
	80357
	101727
	33472
	60332
	21170
	28038
	69958
	14238
	7102
	40225
	11942
	45828
	83815
	113191
	34433
	138546
	36911
	27541
	71959
	135319
	63440
	101888
	33328
	36965
	150527
	32522
	150875
	47977
	30487
	38917
	19302
	49163
	38498
	42377
	112909
	85201
	27874
	88221
	96752
	19808
	8815
	37950
	16447
	86009
	32671
	60230
	7592
	20733
	21538
	59037
	21527
	97241
	64458
	24039
	55802
	64804
	36917
	21977
	9879
	31315

## Sheet: E
control	thrombin
27.66	22.7756
33.9314	31.4131
38.518	31.5543
29.0058	32.2383
26.9504	46.3426
30.0639	45.6767
30.0987	41.5921
27.5382	41.305
30.2326	46.5416
17.5789	51.0285
21.9276	22.2795
31.2585	36.7504
22.9084	41.3238
34.864	37.0152
30.9125	27.7014
27.1568	26.8178
27.1066	22.6526
17.2822	28.3404
48.8007	37.7592
32.0494	33.2442
34.8632	29.3201
30.5735	28.0516
34.933	31.3556
34.5894	34.0296
35.1679	44.0357
32.3888	31.3216
43.2295	33.8985
29.0931	34.0696
27.8142	39.6998
27.1402	28.853
26.459	28.6631
28.0445	20.7122
28.7936	33.1175
29.5359	31.6807
29.2132	30.3969
28.9097	22.0489
19.6266	35.1933
10.8433	24.0236
22.4993	20.2194
29.8144	18.7478
26.1105	12.1598
24.4743	25.117
1.70167	9.51201
5.45925	9.28095
0.621024	13.1202
4.44784	9.84147
0.953157	10.0958
7.12075	20.2211
14.9197	7.58513
5.65409	23.5634
3.97383	16.7453
15.1142	2.50438
17.3197	22.4873
11.9092	29.7043
16.0617	34.998
18.2269	17.2851
18.1661	13.8786
7.02689	15.9917
5.58614	14.1602
9.20532	20.0035
12.9092	21.6867
17.4102	30.3389
4.37013	31.8766
3.39549	34.9689
4.62469	22.6873
5.89929	8.27859
8.17928	2.09983
5.84672	18.2486
6.62141	30.2146
4.23923	6.56973
3.46324	8.31655
5.01499	9.03231
15.0924	25.7409
1.95505	22.9113
11.8132	13.8828
3.19466	10.7119
2.55902	18.8976
7.36773	11.9179
8.43173	34.5383
2.10631	15.9208
3.55769	34.6304
2.71498	28.0251
4.11682	31.4796
5.2627	30.1548
19.1819	21.3192
2.14857	27.1773
9.63102	29.8494
4.76786	23.2662
14.6281	15.7494
15.4581	27.091
16.6246	12.9406
11.3531	7.56686
2.93999	19.0713
9.29622	19.7262
5.74812	25.3017
1.25601	39.3258
8.70763	15.3891
6.21984	35.9581
7.58102	23.6246
2.90037	39.1655
6.80123	22.8141
7.93932	27.5103
14.3103	17.8315
35.5423	39.3062
10.5745	25.9728
17.1727	22.0138
10.3986	27.9202
18.5824	16.3605
14.9696	29.4319
12.1676	17.6837
7.13593	9.05245
0.439006	30.8547
11.8649	30.5052
23.0773	21.5871
3.00661	35.9645
5.12905	30.4741
14.371	36.3288
11.2738	36.8975
18.754	35.559
24.4488	17.638
16.0284	19.7397
38.0595	11.1688
22.4992	28.0834
10.7499	32.465
11.7138	26.7317
20.3025	31.4383
23.9438	16.4526
9.99862	24.3
14.7251	29.9018
6.46324	20.8408
23.0748	28.1589
	12.3039
	31.9699
	12.0898
	7.49069
	28.8513
	11.7388
	27.1301
	25.2557
	22.9627
	7.40385
	16.8875
	3.65582
	33.8427
	19.9689
	31.0105
	35.1056
	13.1948
	1.98279
	27.4412
	47.099
	30.2481
	25.7076
	32.0067
	27.2008
	39.8273
	31.9306
	24.1614
	30.0604
	9.86882
	14.8805
	29.8815
	16.2429
	24.5398
	25.6517
	7.19149
	16.9215
	36.2582
	31.7416
	29.8304
	49.2326
	34.6983
	30.0466
	33.8545
	25.8304
	40.163
	28.4598
	27.5568
	31.7841
	29.2494
	20.9235
	28.5961
	31.9879
	17.0086
	18.6061
	23.7355
	18.5531
	20.8708
	36.1328
	28.9139
	10.9205
	12.2036
	11.5022
	3.33531
	18.8197
	32.2082
	32.8888
	8.65076
	7.77428
	12.7575
	21.683
	26.8267
	26.5862
	25.7939
	15.9053
	17.2861
	16.9103
	6.57644
	2.23263
	11.2423
	2.55717
	10.8571
	15.1701
	25.8663
	27.0913
	31.3453
	41.3337
	19.7427
	25.6355
	29.7274
	35.7006
	27.0117
	27.052
	17.4363
	36.3504
	17.1439
	37.956
	26.4774
	13.8263
	27.8775
	5.24939
	9.94598
	18.6251
	22.4931
	28.0798
	23.2981
	18.0648
	26.4531
	37.4717
	6.85161
	4.76744
	8.91263
	9.41442
	19.7495
	11.2002
	45.9771
	2.68743
	7.26709
	8.31904
	12.2255
	10.9163
	34.916
	11.2277
	8.61922
	18.6691
	21.6157
	8.78767
	3.59336
	1.73043
	4.22548

## Sheet: F
control	thrombin
27.66	28.6244
33.9314	32.5709
38.518	31.5543
29.0058	32.2383
26.9504	46.3426
30.0639	45.6767
30.0987	41.5921
27.5382	41.305
30.2434	46.5416
20.7386	51.0285
23.3524	25.5496
31.2585	36.7504
27.621	41.3238
34.864	37.0152
31.3815	27.7014
27.417	27.2744
27.1066	23.5587
24.9352	28.3633
48.8007	37.7592
32.0494	33.2442
34.8632	29.4446
30.5735	28.4335
34.933	31.3556
34.5894	34.0296
35.1679	44.0357
32.3888	31.3216
43.2295	33.8985
29.0931	34.0696
27.9055	39.6998
27.1402	29.9429
26.6551	29.8682
28.0445	22.0013
28.7936	33.1175
29.5359	32.6113
29.3276	32.0337
28.9097	24.7192
21.9775	37.7056
21.115	33.2133
23.8701	25.5852
29.8144	23.6267
26.7874	21.6487
25.546	26.8223
20.3775	21.7825
20.8996	23.1742
20.6271	21.5553
22.4825	20.9593
19.6639	23.8276
21.9643	24.0245
24.9586	21.3528
24.1298	26.4132
23.843	21.4053
28.4924	19.2694
29.9653	24.4825
26.1906	29.7043
27.2518	34.998
25.9585	22.3402
26.2931	24.3185
24.1006	25.0667
23.1496	24.9726
24.5518	28.6784
25.8105	27.0827
24.8061	30.3389
20.3205	31.8766
20.5387	34.9689
22.0825	27.4558
22.2462	21.6981
24.627	19.9032
24.6701	25.3122
23.1002	30.5384
21.6145	23.4872
25.2481	20.3773
23.7323	22.7599
24.694	27.9784
22.0696	24.8376
24.4418	23.2516
23.4904	22.8162
21.7226	24.0903
24.0535	21.4849
21.4868	34.5482
21.8571	25.4255
22.7975	34.6304
22.4803	28.5399
22.9663	33.2125
21.8685	30.1548
26.7509	23.3521
27.7352	27.8145
22.7667	29.8494
23.4325	26.3257
26.1623	21.6783
26.3287	27.091
28.5067	23.9577
23.3746	21.4725
22.0212	24.7317
24.8864	29.9058
21.6097	29.9037
21.5081	39.3258
22.7491	24.7175
21.9374	35.968
20.4004	23.6246
22.2907	39.1655
23.3272	34.1483
23.6205	28.9876
24.6743	23.425
35.6485	39.3872
26.1844	28.0903
25.3488	26.5687
24.6693	30.8313
27.0918	22.3593
23.7249	29.7052
24.4395	24.3808
24.667	23.1866
22.4231	30.8547
26.2693	35.263
28.807	30.2653
20.8282	35.9645
24.3345	30.4741
27.1145	36.3288
26.2227	36.8975
27.5875	36.1927
26.5577	22.8132
28.151	22.7033
38.0595	20.4632
27.2826	28.0834
21.5056	32.465
23.0669	27.097
26.3714	32.7867
27.4036	27.1042
23.1078	27.2719
24.0113	33.6519
22.8431	28.3808
25.9132	29.7983
	20.0716
	32.4882
	21.1686
	27.8645
	29.7039
	23.2006
	27.5771
	31.6571
	28.7984
	26.2933
	24.2205
	21.3455
	33.9131
	24.6572
	31.0282
	35.1056
	23.1473
	20.082
	30.0968
	47.099
	30.2481
	25.7076
	32.0067
	33.3961
	39.8273
	31.9306
	25.4138
	30.0604
	21.6603
	25.0144
	30.2843
	23.5323
	25.6187
	29.3316
	21.4796
	24.0594
	36.2582
	31.7416
	31.0897
	49.2326
	34.6983
	30.116
	33.8545
	32.4047
	40.163
	29.6019
	28.6405
	32.6235
	30.7877
	23.836
	28.6943
	31.996
	23.129
	25.1873
	26.1757
	25.6518
	24.4348
	36.1328
	28.9301
	21.9436
	21.3293
	22.855
	20.5343
	25.2494
	35.2938
	34.3059
	19.9038
	19.2194
	21.7873
	25.3893
	28.6878
	26.5862
	28.8532
	31.9789
	29.0549
	24.7464
	20.7854
	18.5431
	27.7605
	21.287
	22.4647
	25.6002
	27.1116
	27.1126
	31.3453
	41.3337
	28.5992
	30.6861
	32.2572
	35.7006
	29.923
	27.318
	22.9882
	38.0311
	25.0941
	38.1094
	26.5653
	22.1402
	31.2586
	22.0091
	24.7299
	36.2164
	31.6956
	29.9493
	30.3964
	31.0747
	27.8651
	38.3937
	24.4543
	27.4611
	25.0992
	24.2939
	26.8108
	26.2207
	45.9771
	25.6486
	26.6834
	22.0225
	26.3911
	25.9049
	34.9914
	25.7832
	19.8998
	26.674
	25.6345
	24.8935
	21.2133
	20.7979
	25.626
