# Supplementary material for: Junction Mapper is a novel computer vision tool to decipher cell–cell contact phenotypes
Source: eLife. 2019 Dec 3;8:e45413. doi: 10.7554/eLife.45413 (PMC7034980; doi:10.7554/eLife.45413)
Supplement: Figure 8—source data 1. [file elife-45413-fig8-data1.xlsx]

## Sheet: Explanation
Source Data 8 complementing Figure 8
Figure 8 Panel B data	B (beta-catenin)	interface linearity index, interface occupancy, beta-catenin intensity, beta-catenin intensity per interface area, beta-catenin cluster density
Figure 8 Panel C data	C (Connexin-43)	interface linearity index, interface occupancy, connexin-43 intensity, connexin-43 intensity per interface area, connexin-43 cluster density

## Sheet: B (beta-catenin)
interface linearity index		interface occupancy		beta-catenin intensity		beta-catenin intensity per interface area		beta-catenin cluster density
control	PE	control	PE	control	PE	control	PE	control	PE
1.24575	1.32529	7.14286	23.5955	555	15256	4.95536	21.427	69.375	90.8095
1.17239	1.14037	25.1546	65.0862	10917	15950	22.5093	68.75	89.4836	105.629
1.17933	1.07367	4.91573	34.236	3084	16793	4.33146	32.4816	88.1143	94.8757
1.89195	1.2702	17.1091	30.6122	6367	5962	18.7817	30.4184	109.776	99.3667
1.22344	1.2573	19.5031	46.6825	13325	18132	16.5528	42.9668	84.8726	92.0406
1.20168	1.26361	23.2759	50.7788	8247	14968	23.6983	46.6293	101.815	91.8282
1.22804	1.15199	16.6667	32.964	3614	10411	13.6894	28.8393	82.1364	87.4874
1.30882	1.12267	40.3636	20.7317	11309	9192	41.1236	18.6829	101.883	90.1176
1.27674	1.22469	9.85761	30.2158	9608	6559	10.5236	23.5935	106.756	78.0833
1.23479	1.13047	18.9265	27.907	6979	6482	19.7147	25.124	104.164	90.0278
1.28601	1.09676	30.5556	36.715	5037	11516	27.9833	27.8164	91.5818	75.7632
1.1863	1.13133	13.3858	33.5121	2486	10370	9.7874	27.8016	73.1176	82.96
1.34392	1.25032	19.4805	46.6102	8201	18010	15.2152	38.1568	78.1048	81.8636
1.15081	1.19693	36.5333	35.8139	16464	12836	43.904	29.8512	120.175	83.3507
1.26938	1.18573	18.8281	32.8767	20808	11834	19.9885	27.0183	106.163	82.1806
1.14451	1.22841	15.5039	12.6836	4596	7214	17.8139	9.63151	114.9	75.9368
1.12729	1.02301	16.2447	22.0657	9141	3778	19.2848	17.7371	118.714	80.383
1.14428	1.17899	5.01475	5.35406	1516	2089	4.47198	3.60794	89.1765	67.3871
1.19956	1.24901	15.3942	11.4625	11919	2278	14.9174	9.00395	96.9024	78.5517
1.30961	1.16066	15.9722	20.8861	10513	2716	14.6014	17.1899	91.4174	82.303
1.25039	1.11666	17.9871	26.7081	8781	5955	18.803	18.4938	104.536	69.2442
1.15672	1.10703	24.2537	38.9535	7181	6234	26.7948	36.2442	110.477	93.0448
1.12353	1.02756	11.076	42.562	3123	8435	9.88291	34.8554	89.2286	81.8932
1.23338	1.19052	20.5318	12.069	12743	1409	18.8227	8.0977	91.6763	67.0952
1.39196	1.32651	12.8319	33.2418	3196	9487	14.1416	26.0632	110.207	78.405
1.14831	1.19118	15.4684	45.946	6329	6223	13.7887	42.0473	89.1409	91.5147
1.29397	1.14238	32.3983	7.90698	24867	1102	34.8766	5.12558	107.649	64.8235
1.22006	1.04142	22.8628	26.5151	11151	2379	22.169	18.0227	96.9652	67.9714
1.17515	1.19188	39.0935	4.85437	17600	741	49.8584	3.59709	127.536	74.1
1.25505	1.23622	18.0645	12.8049	9782	1269	15.7774	7.7378	87.3393	60.4286
1.22792	1.11564	33.2268	10.3846	19496	3416	31.1438	6.56923	93.7308	63.2593
1.47874	1.15113	14.5025	34.4311	8164	10824	13.7673	32.4072	94.9302	94.1217
1.21037	1.17565	40.5248	47.8261	16924	9043	49.3411	49.1467	121.755	102.761
1.31842	1.15198	34.3931	22.6776	11817	8837	34.1532	24.1448	99.3025	106.47
1.12206	1.2811	28.3372	27.7385	12818	14184	30.0187	25.0601	105.934	90.344
1.36555	1.11371	28.0405	33.0134	16937	16660	28.6098	31.977	102.03	96.8605
1.12633	1.54447	14.4796	42.0804	3372	18174	15.2579	42.9645	105.375	102.101
1.09972	1.1021	54.0741	54.8611	18408	15948	68.1778	55.375	126.082	100.937
1.17867	1.62356	17.1598	46.5517	9311	26682	18.3649	41.8213	107.023	89.8384
1.21894	1.12256	16.7832	42.6357	6592	13654	15.366	35.2816	91.5556	82.7515
1.09496	1.13599	27.8607	17.5294	9977	11068	24.8184	13.0212	89.0804	74.2819
1.13273	1.13599	27.6596	17.5294	10676	11068	25.2388	13.0212	91.2479	74.2819
1.14918	1.18016	40.8349	28.5088	28580	5973	51.8693	26.1974	127.022	91.8923
1.12299	1.28493	27.5676	53.5783	4782	22572	25.8486	43.6596	93.7647	81.4874
1.16557	1.18684	9.20635	29.6371	8345	11912	8.83069	24.0161	95.9195	81.034
1.16234	1.19424	38.7324	45.0346	19405	14677	45.5516	33.8961	117.606	75.2667
1.13483	1.28502	39.2593	15.6479	11908	4932	44.1037	12.0587	112.34	77.0625
1.08411	1.15272	23.2258	28.6274	3179	6558	20.5097	25.7176	88.3056	89.8356
1.34173	1.09301	22.3035	17.8947	12381	3583	22.6344	12.5719	101.484	70.2549
1.19406	1.10424	20.3109	17.0213	20430	11176	21.171	16.9848	104.235	99.7857
1.07685	1.20138	38.9262	17.4603	6353	3145	42.6376	12.4802	109.534	71.4773
1.11194	2.263	13.6141	24.1379	13857	13882	13.572	29.9181	99.6906	123.946
1.17279	1.15707	40.1496	25.5072	15273	15029	38.0873	21.7812	94.8634	85.392
1.06296	1.14978	39.8438	22.4599	11516	4097	44.9844	21.9091	112.902	97.5476
1.48902	1.18227	60.7438	54.359	17916	10660	74.0331	54.6667	121.877	100.566
1.08204	1.07871	26.5306	43.0754	4472	46186	30.4218	44.1127	114.667	102.408
1.10905	1.33803	21.8593	14.6269	9409	5383	23.6407	16.0687	108.149	109.857
1.23349	1.17006	13.8169	33.5463	8954	22720	15.4646	36.2939	111.925	108.191
1.14007	1.1586	29.4372	42.1304	6898	31256	29.8615	49.6916	101.441	117.947
1.12944	1.06735	22.8412	46.3094	7255	46757	20.2089	47.2771	88.4756	102.09
1.1702	1.18717	60.9428	20.2358	26133	13576	87.9899	26.6719	144.381	131.806
1.17038	1.16701	40.6844	37.2727	11381	23853	43.2738	43.3691	106.365	116.356
1.23316	1.09227	29.6218	25.5624	12812	13034	26.916	26.6544	90.8653	104.272
2.28172	1.08204	35.5	71.1539	23581	20145	39.3017	96.851	110.709	136.115
1.14555	1.44048	13.1261	42.0118	7865	38490	13.5838	56.9379	103.487	135.528
1.18486	1.16539	27.8373	26.1555	12850	30307	27.5161	31.8351	98.8461	121.715
1.19177	1.11967	30.086	52.6627	10392	11617	29.7765	68.7396	98.9714	130.528
1.11748	1.11795	31.2937	52.6549	20152	26231	35.2308	58.0332	112.581	110.214
1.22904	1.16241	7.16049	19.8895	2287	4198	5.64691	23.1934	78.8621	116.611
1.12001	1.12897	17.6183	45.3441	9715	11185	15.8483	45.2834	89.9537	99.8661
1.20164	1.18053	49.47	21.0736	16953	11601	59.9046	23.0636	121.093	109.443
1.11785	1.15761	23.1383	21.1838	9020	13110	23.9894	20.4206	103.678	96.3971
1.25095	1.15003	1.22449	40.724	167	18813	0.681633	42.5633	55.6667	104.517
1.09117	1.16513	40.3302	26.4368	15161	10873	35.7571	24.9954	88.6608	94.5478
1.12407	1.27408	14.1176	27.6042	2139	38318	12.5823	33.2621	89.125	120.497
1.15624	1.09703	21.8978	34.6639	9552	16832	23.2409	35.3613	106.133	102.012
1.28751	1.13426	21.1931	35.4949	14507	13635	22.7739	46.5358	107.459	131.106
1.22444	1.35269	17.3469	48.949	6365	44837	21.6497	67.3228	124.804	137.537
1.08554	1.10143	16.7224	24.7059	5420	6419	18.1271	25.1726	108.4	101.889
1.22639	1.18877	21.0811	26.484	11509	5180	20.7369	23.653	98.3675	89.3103
1.11832	1.09255	24.7253	42.3295	5161	16465	28.3571	46.7756	114.689	110.503
1.08294	1.3837	9.93789	34.8214	3179	12739	9.87267	37.9137	99.3438	108.88
1.05345	1.2383	17.004	48.3304	5791	26357	23.4453	46.3216	137.881	95.8436
1.19222	1.16225	33.5078	20.3187	20120	4794	35.1134	19.0996	104.792	94
1.12007	1.28567	15.942	41.4953	3951	24966	19.087	46.6654	119.727	112.46
1.12601	1.13428	3.02198	7.98479	2025	4338	2.78159	8.24715	92.0455	103.286
1.14142	1.20821	67.4699	83.1858	7757	12105	93.4578	107.124	138.518	128.777
1.65849	1.14627	13.1514	20.4545	5602	2791	13.9007	15.858	105.698	77.5278
1.27386	1.1183	19.3893	46.2435	11212	39668	17.1176	51.3834	88.2835	111.115
1.14836	1.32363	19.3617	57.1429	17879	29576	19.0202	64.0173	98.2363	112.03
1.18526	1.17326	11.1437	33.3884	3059	20819	8.97067	34.4116	80.5	103.064
1.25405	1.39172	18.1287	14.5594	12885	3503	15.0702	13.4215	83.129	92.1842
1.14772	1.219	27.9678	40.7821	13428	32799	27.0181	45.8087	96.6043	112.325
1.14607	1.67233	42.268	26.6667	12476	9459	42.8728	31.53	101.431	118.237
1.1408	1.16185	26.9618	18.1185	12327	5973	24.8028	20.8118	91.9925	114.865
1.12526	1.16273	41.3043	28.9809	14793	18811	53.5978	29.9538	129.763	103.357
1.09765	1.10892	50.8696	19.7452	15407	2430	66.9869	15.4777	131.684	78.3871
1.21231	1.27636	30.2083	33.5435	2429	26711	25.3021	33.6835	83.7586	100.417
1.32956	1.07296	23.5119	81.0345	7203	13707	21.4375	118.164	91.1772	145.819
1.12716	1.09014	26.3158	60.739	4001	34546	23.3977	79.7829	88.9111	131.354
1.15374	1.24081	7.38636	50.7299	4008	16336	5.69318	59.6204	77.0769	117.525
1.55311	1.11509	20.2811	73.0061	8433	25513	16.9337	78.2607	83.4951	107.198
1.06251	1.18542	13.5624	38.2796	6341	18256	11.4665	39.2602	84.5467	102.562
1.07513	1.04223	25.1046	27.4247	4888	6175	20.4519	20.6522	81.4667	75.3049
1.1061	1.12942	19.7995	64.5833	6193	26438	15.5213	91.7986	78.3924	142.14
1.25337	1.4136	28.9183	37.732	24483	18388	27.0232	37.9134	93.4466	100.481
1.10473	1.13303	30.7918	52.741	21021	30713	30.8226	58.0586	100.1	110.082
1.15275	1.07664	1.08108	14.1317	118	11469	0.637838	13.7353	59	97.1949
1.20365	1.12413	22.5549	4.38144	11371	1986	22.6966	5.11856	100.628	116.823
1.14214	1.08036	32.3944	29.0735	15875	9811	31.9416	31.3451	98.6025	107.813
1.07941	1.2218	38.4858	40.5775	11375	27395	35.8833	41.6337	93.2377	102.603
1.10041	1.13024	64.4444	46.7857	12980	14393	57.6889	51.4036	89.5172	109.87
1.42882	1.21527	37.6022	41.048	10833	15098	29.5177	32.9651	78.5	80.3085
1.16099	1.21978	30.8271	29.4821	3589	14589	26.985	29.0617	87.5366	98.5743
1.13749	1.31985	70.073	40.678	15121	14509	55.1861	40.9859	78.7552	100.757
1.24548	1.16661	47.8723	33.2192	3673	31195	39.0745	35.6107	81.6222	107.199
1.20865	1.29448	41.8118	25.7377	10586	14167	36.885	23.2246	88.2167	90.2357
1.14011	1.30183	38.6364	25.3012	10259	9492	33.3084	22.8723	86.2101	90.4
1.09302	1.11743	17.803	12.3042	3970	3914	15.0379	8.75615	84.4681	71.1636
1.20389	1.11216	12.1359	27.193	4205	6913	10.2063	20.2135	84.1	74.3333
1.31792	1.13111	15.8771	28.4974	12400	3690	15.8771	19.1192	100	67.0909
1.16111	1.57774	31.2741	16.9811	16229	3724	31.3301	11.7107	100.179	68.963
1.16254	1.26969	47.4088	19.2547	25037	17847	48.0557	18.4751	101.364	95.9516
1.0948	1.14762	15.0538	39.7463	8696	20115	13.3579	42.5264	88.7347	106.995
1.13861	1.18574	18	53.1746	13297	11929	15.6435	47.3373	86.9085	89.0224
1.24649	1.22752	11.3674	38.9163	6177	33996	10.1763	41.867	89.5217	107.582
1.18869	1.05746	21.9697	59.0361	1949	18459	14.7652	55.5994	67.2069	94.1786
1.20335	1.13774	11.9755	33.3333	12943	24254	11.3138	32.5995	94.4745	97.7984
1.21957	1.14226	38.565	41.5241	10005	24875	44.8655	38.6859	116.337	93.1648
1.174	1.06723	24.0924	27.8075	9753	4525	32.1881	24.1979	133.603	87.0192
1.13362	1.2748	37.4269	26.4463	15466	7028	45.2222	19.3609	120.828	73.2083
1.1389	1.10862	11.8721	45.8042	7428	24710	11.3059	43.1993	95.2308	94.313
1.13927	1.17111	33.9934	28.3208	10884	9741	35.9208	24.4135	105.67	86.2035
1.24916	1.27086	55.8824	39.302	5449	26201	53.4216	39.7587	95.5965	101.162
1.17235	1.33381	16.8459	17.4881	10739	8656	12.8303	13.7615	76.1631	78.6909
1.13426	1.26917	34.5912	17.8649	5746	7505	36.1384	16.3508	104.473	91.5244
1.1806	1.1579	24.2094	20.7273	21943	4915	23.9291	17.8727	98.8423	86.2281
1.23229	1.15097	4.78723	61.6822	601	16405	3.19681	76.6589	66.7778	124.28
1.38096	1.1599	17.5103	35.3873	14386	18832	19.6799	33.1549	112.391	93.6915
1.24055	1.28153	16.4706	32.6039	5169	13676	20.2706	29.9256	123.071	91.7852
1.11843	1.18728	16.2297	11.2245	12970	3234	16.1923	8.25	99.7692	73.5
1.17083	1.18446	26.7442	62.8571	7964	23645	30.8682	61.4156	115.42	97.7066
1.30656	1.19187	11.326	47.2727	3312	17269	9.14917	52.3303	80.7805	110.699
1.1747	1.16525	19.5804	38.4088	9226	24481	16.1294	33.5816	82.375	87.4321
1.15884	1.14843	15.146	59.322	13032	6609	11.8905	56.0085	78.506	94.4143
1.09672	1.32316	13.0435	78.2341	2856	42099	9.55184	86.4456	73.2308	110.496
1.16689	1.13396	22.0207	41.1367	7433	28698	19.2565	38.8336	87.4471	94.4013
1.12222	1.34888	15.7895	29.6482	7600	5980	12.5	30.0502	79.1667	101.356
1.07598	1.19223	40.7258	46.3221	10590	24443	42.7016	48.5944	104.852	104.906
1.31921	1.36403	36.0714	36.9444	9402	12435	33.5786	34.5417	93.0891	93.4962
1.16572	1.13508	14.0379	44.877	8481	21773	13.377	44.6168	95.2921	99.4201
1.12331	1.15188	18.6207	59.8315	8093	26300	18.6046	73.8764	99.9136	123.474
1.09956	1.26056	11.3773	47.5638	3670	15232	10.988	35.3411	96.579	74.3024
1.23964	1.11362	20.6255	38.2199	23809	18080	20.1259	31.5532	97.5779	82.5571
1.17729	1.57353	24.5575	72.8083	10393	50178	22.9934	74.5587	93.6306	102.404
1.25479	1.197	24.9357	23.6773	9784	12756	25.1517	16.873	100.866	71.2626
1.57186	1.14017	38.61	46.1187	11880	7341	45.8687	33.5206	118.8	72.6832
1.26236	1.13247	28.2443	53.6723	14608	24267	27.8779	45.7006	98.7027	85.1474
1.18293	1.34885	58.8496	45.2563	12487	34873	55.2522	38.0294	93.8872	84.0313
1.08267	1.57849	72.1461	58.2577	22211	61416	101.42	55.7314	140.576	95.6636
1.1464	1.16762	36.7698	39.3548	23958	4845	41.1649	31.2581	111.953	79.4262
1.37766	1.17816	57.9125	31.3235	22556	17755	75.9461	26.1103	131.139	83.3568
1.22913	1.17058	33.5463	9.86301	19485	3533	31.1262	9.67945	92.7857	98.1389
1.26517	1.21768	45.4023	77.961	45820	52918	52.6667	79.3373	116	101.765
1.10878	1.29095	33.0532	39.9775	12156	28862	34.0504	32.5022	103.017	81.3014
1.24605	1.11413	20.3732	2.49042	13331	798	20.7325	1.52874	101.763	61.3846
1.19068	1.16281	37.5465	20.7547	19114	13512	35.5279	14.9967	94.6238	72.2567
	1.16457		10.8462		7249		8.64005		79.6593
	1.20425		58.6605		21512		49.6813		84.6929
	1.28034		65.7143		25916		56.9582		86.6756
	1.33015		53.0671		29968		42.7504		80.5591
	1.13955		60.6607		20209		60.6877		100.044
	1.11666		63.354		20184		62.6832		98.9412
	1.26087		28.6674		21899		24.523		85.543
	1.19449		32.7231		11132		25.4737		77.8461
	1.17333		24.5033		5757		19.0629		77.7973
	1.08044		41.0714		5406		48.2679		117.522
	1.25662		10.582		4823		8.50617		80.3833
	1.18585		25.9494		9897		20.8798		80.4634
	1.20152		13.961		7101		11.5276		82.5698
	1.21693		34.7603		20622		35.3117		101.586
	1.09206		4.0404		792		2.66667		66
	1.13434		12.7907		2535		9.82558		76.8182
	1.25821		8.68726		3225		6.22587		71.6667
	1.23639		27.0806		16271		21.4941		79.3707
	1.55456		24.6187		10072		21.9434		89.1327
	1.39912		12.7976		7548		11.2321		87.7674
	1.26411		35.1515		15295		30.899		87.9023
	1.16649		24.4898		7838		19.9949		81.6458
	1.20868		34.3931		9258		26.7572		77.7983
	1.20714		14.8789		3009		10.4118		69.9767
	1.24171		14.3548		6410		10.3387		72.0225
	1.17993		12.6844		3352		9.88791		77.9535
	1.10411		21.6146		7414		19.3073		89.3253
	1.11975		17.6471		4260		13.1889		74.7368
	1.23595		15.6089		7477		12.825		82.1648
	1.05797		11.3636		695		7.89773		69.5
	1.08935		30.9434		6477		24.4415		78.9878
	1.1584		5.55556		847		4.70556		84.7
	1.2422		22.0049		7422		18.1467		82.4667
	1.11233		9.95851		3763		7.80705		78.3958
	1.13725		39.6825		14705		38.9021		98.0333
	1.07779		38.4342		9407		33.4769		87.1018
	1.15449		6.36943		2170		4.60722		72.3333
	1.31018		38.0759		23742		32.1707		84.4911
	1.20422		49.8965		24856		51.4617		103.137
	1.12377		47.5525		25099		58.5058		123.034
	1.12274		58.0189		15528		73.2453		126.244
	1.33706		47.2019		41475		50.4562		106.894
	1.20309		57.0902		37374		68.8287		120.561
	1.17856		66.2577		47375		96.8814		146.219
	1.16343		51.1521		24047		55.4078		108.32
	1.0468		42.8571		8278		56.3129		131.397

## Sheet: C (Connexin-43)
interface linearity index		interface occupancy		Connexin-43 intensity		Connexin-43 intensity per interface area		Connexin 43 cluster density
control	PE	control	PE	control	PE	control	PE	control	PE
1.24575	1.32529	23.2143	2.38764	2190	1065	19.5536	1.49579	84.2308	62.6471
1.17239	1.14037	8.45361	0.431034	2606	67	5.3732	0.288793	63.561	67
1.17933	1.07367	6.03933	10.058	3017	4122	4.23736	7.97292	70.1628	79.2692
1.89195	1.2702	1.17994	5.61224	301	645	0.887906	3.29082	75.25	58.6364
1.22344	1.2573	0	4.50237	0	1010	0	2.39337	0	53.1579
1.20168	1.26361	1.43678	1.24611	238	184	0.683908	0.573209	47.6	46
1.22804	1.15199	0	5.54017	0	1077	0	2.98338	0	53.85
1.30882	1.12267	0.727273	16.0569	112	7584	0.407273	15.4146	56	96
1.27674	1.22469	5.14786	1.43885	3627	235	3.97262	0.845324	77.1702	58.75
1.23479	1.13047	0.564972	9.68992	99	1451	0.279661	5.62403	49.5	58.04
1.28601	1.09676	2.22222	6.03865	233	1483	1.29444	3.58213	58.25	59.32
1.1863	1.13133	0.787402	4.28954	127	908	0.5	2.43432	63.5	56.75
1.34392	1.25032	6.30798	9.5339	2359	3507	4.37662	7.43009	69.3824	77.9333
1.15081	1.19693	10.6667	11.8605	2404	3331	6.41067	7.74651	60.1	65.3137
1.26938	1.18573	0.384246	7.99087	225	2070	0.216138	4.72603	56.25	59.1429
1.14451	1.22841	0.387597	12.6836	39	6104	0.151163	8.14953	39	64.2526
1.12729	1.02301	1.89873	15.0235	389	2664	0.820675	12.507	43.2222	83.25
1.14428	1.17899	0	16.753	0	8548	0	14.7634	0	88.1237
1.19956	1.24901	5.00626	0	2525	0	3.1602	0	63.125	0
1.30961	1.16066	0	3.79747	0	400	0	2.53165	0	66.6667
1.19406	1.11666	4.14508	12.4224	2930	3117	3.03627	9.68012	73.25	77.925
1.07685	1.10703	4.02684	12.7907	273	1470	1.83221	8.54651	45.5	66.8182
1.11194	1.02756	5.19099	26.0331	4091	5703	4.00686	23.5661	77.1887	90.5238
1.17279	1.19052	1.74564	1.72414	366	163	0.912718	0.936782	52.2857	54.3333
1.06296	1.32651	0	7.41758	0	1478	0	4.06044	0	54.7407
1.48902	1.19118	3.71901	7.43243	590	710	2.43802	4.7973	65.5556	64.5455
1.08204	1.14238	2.04082	0.930233	165	95	1.12245	0.44186	55	47.5
1.10905	1.04142	4.27136	18.1818	797	1369	2.00251	10.3712	46.8824	57.0417
1.23349	1.19188	4.83592	0	2074	0	3.58204	0	74.0714	0
1.14007	1.23622	0.4329	12.8049	47	1257	0.203463	7.66463	47	59.8571
1.12944	1.11564	4.45682	13.8461	1192	5873	3.32033	11.2942	74.5	81.5694
1.1702	1.15113	3.367	0	653	0	2.19865	0	65.3	0
1.17038	1.17565	7.98479	0	1383	0	5.25856	0	65.8571	0
1.23316	1.15198	5.88235	1.63934	1735	286	3.64496	0.781421	61.9643	47.6667
2.28172	1.2811	0.333333	4.59364	87	1832	0.145	3.23675	43.5	70.4615
1.14555	1.11371	19.171	10.7486	10788	4879	18.6321	9.36468	97.1892	87.125
1.18486	1.54447	2.14133	11.5839	517	3137	1.10707	7.41608	51.7	64.0204
1.19177	1.1021	1.7192	1.04167	346	136	0.991404	0.472222	57.6667	45.3333
1.11748	1.62356	5.06993	2.19436	1762	705	3.08042	1.10502	60.7586	50.3571
1.22904	1.12256	0.246914	2.58398	46	476	0.11358	1.22997	46	47.6
1.12001	1.13599	1.79445	1.29412	581	535	0.947798	0.629412	52.8182	48.6364
1.20164	1.13599	1.41343	1.29412	193	535	0.681979	0.629412	48.25	48.6364
1.11785	1.18016	4.78723	0.877193	1574	81	4.18617	0.355263	87.4444	40.5
1.25095	1.28493	2.44898	4.25532	689	1115	2.81224	2.15667	114.833	50.6818
1.09117	1.18684	0.943396	1.81452	192	628	0.45283	1.26613	48	69.7778
1.12407	1.19424	0.588235	2.30947	39	548	0.229412	1.26559	39	54.8
1.15624	1.28502	11.4355	3.17848	4378	716	10.6521	1.75061	93.1489	55.0769
1.28751	1.15272	1.41287	0	436	0	0.684458	0	48.4444	0
1.22444	1.09301	2.38095	5.26316	320	718	1.08844	2.5193	45.7143	47.8667
1.08554	1.10424	8.02676	12.31	1613	7627	5.39465	11.5912	67.2083	94.1605
1.22639	1.20138	4.68468	0	1608	0	2.8973	0	61.8462	0
1.11832	2.263	9.89011	2.37069	1253	671	6.88462	1.44612	69.6111	61
1.08294	1.15707	1.55279	7.68116	211	4216	0.65528	6.11015	42.2	79.5472
1.05345	1.14978	0.809717	3.74331	100	580	0.404858	3.1016	50	82.8571
1.19222	1.18227	5.58464	12.3077	1953	2053	3.40838	10.5282	61.0312	85.5417
1.12007	1.07871	1.93237	10.6972	166	9935	0.801932	9.48902	41.5	88.7054
1.12601	1.33803	1.78571	0	737	0	1.01236	0	56.6923	0
1.14142	1.17006	6.0241	4.47284	271	1520	3.26506	2.42812	54.2	54.2857
1.65849	1.1586	4.71464	6.04134	1646	2864	4.08437	4.55326	86.6316	75.3684
1.27386	1.06735	6.87023	7.07786	2455	6207	3.74809	6.27604	54.5556	88.6714
1.14836	1.18717	5.85106	1.96464	4351	813	4.62872	1.59725	79.1091	81.3
1.18526	1.16701	0	8	0	3322	0	6.04	0	75.5
1.25405	1.09227	5.02924	0.613497	2882	187	3.37076	0.382413	67.0233	62.3333
1.14772	1.08204	10.2616	2.88462	3553	292	7.14889	1.40385	69.6667	48.6667
1.14607	1.44048	0	5.6213	0	3372	0	4.98817	0	88.7368
1.1408	1.16539	2.01207	5.14706	717	4422	1.44266	4.64496	71.7	90.2449
1.12526	1.11967	3.62319	3.5503	656	314	2.37681	1.85799	65.6	52.3333
1.09765	1.11795	3.47826	10.6195	562	3967	2.44348	8.77655	70.25	82.6458
1.21231	1.16241	0	3.8674	0	523	0	2.8895	0	74.7143
1.32956	1.12897	0.892857	2.02429	145	344	0.431548	1.39271	48.3333	68.8
1.12716	1.18053	1.16959	3.37972	118	1142	0.690059	2.27038	59	67.1765
1.15374	1.15761	8.38068	18.2243	3548	12604	5.03977	19.6324	60.1356	107.727
1.55311	1.15003	1.60643	7.91855	373	2433	0.748996	5.50453	46.625	69.5143
1.06251	1.16513	4.88246	1.60919	1432	498	2.58951	1.14483	53.037	71.1429
1.07513	1.27408	12.1339	0.954861	2257	669	9.44351	0.580729	77.8276	60.8182
1.10041	1.09703	8.88889	4.20168	1120	2128	4.97778	4.47059	56	106.4
1.42882	1.13426	2.45232	34.471	454	11638	1.23706	39.7201	50.4444	115.228
1.16099	1.35269	2.25564	4.05405	150	2579	1.12782	3.87237	50	95.5185
1.13749	1.10143	3.28467	3.13726	470	419	1.71533	1.64314	52.2222	52.375
1.24548	1.18877	13.8298	9.13242	649	1551	6.90426	7.08219	49.9231	77.55
1.20865	1.09255	0.696864	12.2159	76	3680	0.264808	10.4545	38	85.5814
1.14011	1.3837	1.94805	7.14286	253	2407	0.821429	7.16369	42.1667	100.292
1.09302	1.2383	1.89394	10.3691	234	4742	0.886364	8.33392	46.8	80.3729
1.20389	1.16225	3.64078	27.0916	1215	6071	2.94903	24.1872	81	89.2794
1.31792	1.28567	5.50576	14.9533	2877	7232	3.68374	13.5178	66.907	90.4
1.16111	1.13428	9.84556	0.190114	2884	44	5.56757	0.0836502	56.549	44
1.16254	1.20821	5.37428	11.5044	1549	900	2.97313	7.9646	55.3214	69.2308
1.0948	1.14627	3.84025	3.97727	1325	384	2.03533	2.18182	53	54.8571
1.13861	1.1183	6.82353	6.21762	3935	2846	4.62941	3.68653	67.8448	59.2917
1.24649	1.32363	2.47117	1.08225	901	253	1.48435	0.547619	60.0667	50.6
1.18869	1.17326	8.33333	3.96694	562	1377	4.25758	2.27603	51.0909	57.375
1.11843	1.39172	7.99001	0	5117	0	6.38826	0	79.9531	0
1.17083	1.219	0	1.95531	0	872	0	1.21788	0	62.2857
1.30656	1.67233	1.65746	2.66667	253	586	0.698895	1.95333	42.1667	73.25
1.1747	1.16185	0	28.223	0	9418	0	32.8153	0	116.272
1.15884	1.16273	3.74088	8.59873	3247	5304	2.96259	8.44586	79.1951	98.2222
1.09672	1.10892	1.33779	0	207	0	0.692308	0	51.75	0
1.16689	1.27636	5.18135	12.8626	1208	8225	3.12953	10.372	60.4	80.6372
1.12222	1.07296	6.74342	23.2759	4211	2501	6.92599	21.5603	102.707	92.6296
1.07598	1.09014	0.403226	12.4711	40	3745	0.16129	8.64896	40	69.3518
1.31921	1.24081	2.5	3.28467	426	578	1.52143	2.10949	60.8571	64.2222
1.16572	1.11509	2.83912	1.22699	1844	246	2.90852	0.754601	102.444	61.5
1.12331	1.18542	3.90805	21.9355	1002	10470	2.30345	22.5161	58.9412	102.647
1.09956	1.04223	0.299401	1.00334	39	186	0.116766	0.622074	39	62
1.23964	1.12942	10.6509	12.8472	8062	2925	6.81488	10.1562	63.9841	79.0541
1.17729	1.4136	0.884956	4.74227	185	1796	0.409292	3.70309	46.25	78.087
1.25479	1.13303	0.771208	20.2268	174	11371	0.447301	21.4953	58	106.271
1.57186	1.07664	0.772201	11.018	83	7204	0.320463	8.62754	41.5	78.3043
1.26236	1.12413	0.572519	9.02062	150	3109	0.28626	8.01289	50	88.8286
1.18293	1.08036	0	12.4601	0	3309	0	10.5719	0	84.8461
1.08267	1.2218	8.21918	0.911854	1161	362	5.30137	0.550152	64.5	60.3333
1.1464	1.13024	9.10653	4.64286	3692	785	6.34364	2.80357	69.6604	60.3846
1.37766	1.21527	3.7037	0.218341	577	43	1.94276	0.0938865	52.4545	43
1.22913	1.21978	3.67412	4.18327	1194	947	1.90735	1.88645	51.913	45.0952
1.26517	1.31985	0.91954	0.282486	339	50	0.389655	0.141243	42.375	50
1.10878	1.16661	5.60224	4.3379	1142	2954	3.19888	3.37215	57.1	77.7368
1.24605	1.29448	8.39813	2.13115	5309	569	8.25661	0.932787	98.3148	43.7692
1.19068	1.30183	9.66543	1.92771	3413	495	6.34387	1.19277	65.6346	61.875
1.25039	1.11743	13.9186	10.5145	7109	2519	15.2227	5.63535	109.369	53.5958
1.15672	1.11216	3.35821	0	540	0	2.01492	0	60	0
1.12353	1.13111	0	1.03627	0	140	0	0.725389	0	70
1.23338	1.57774	6.20384	0.943396	3679	128	5.43427	0.402516	87.5952	42.6667
1.39196	1.26969	2.65487	1.0352	715	564	3.16372	0.583851	119.167	56.4
1.14831	1.14762	14.8148	1.47992	7455	364	16.2418	0.769556	109.632	52
1.29397	1.18574	5.32959	0.793651	2609	109	3.65919	0.43254	68.6579	54.5
1.22006	1.22752	11.1332	1.47783	4332	518	8.61233	0.637931	77.3571	43.1667
1.17515	1.05746	2.83286	0	630	0	1.7847	0	63	0
1.25505	1.13774	4.67742	4.97312	2846	1998	4.59032	2.68548	98.1379	54
1.22792	1.14226	10.7029	1.71073	7699	650	12.2987	1.01089	114.91	59.0909
1.47874	1.06723	1.85498	0	527	0	0.888702	0	47.9091	0
1.21037	1.2748	2.62391	0	506	0	1.47522	0	56.2222	0
1.31842	1.10862	8.95954	11.7133	2912	4340	8.41619	7.58741	93.9355	64.7761
1.12206	1.17111	14.2857	8.5213	4381	3410	10.2599	8.54637	71.8197	100.294
1.36555	1.27086	7.93919	8.80121	2930	4088	4.94932	6.20334	62.3404	70.4828
1.12633	1.33381	5.42986	0	916	0	4.1448	0	76.3333	0
1.09972	1.26917	4.81482	1.30719	871	414	3.22593	0.901961	67	69
1.17867	1.1579	11.8343	2.54546	3871	479	7.63511	1.74182	64.5167	68.4286
1.21894	1.15097	5.82751	0	2073	0	4.83217	0	82.92	0
1.09496	1.1599	0	5.6338	0	2377	0	4.18486	0	74.2812
1.13273	1.28153	0.472813	3.71991	76	1026	0.179669	2.24508	38	60.3529
1.14918	1.18728	7.44102	0	2588	0	4.69691	0	63.1219	0
1.12299	1.18446	0	4.41559	0	883	0	2.29351	0	51.9412
1.16557	1.19187	0	8.18182	0	1671	0	5.06364	0	61.8889
1.16234	1.16525	0.938967	0.685871	176	239	0.413145	0.327846	44	47.8
1.13483	1.14843	0.37037	0	46	0	0.17037	0	46	0
1.08411	1.32316	1.29032	1.64271	76	442	0.490323	0.907597	38	55.25
1.34173	1.13396	0.731261	1.62382	173	601	0.316271	0.813261	43.25	50.0833
1.1061	1.34888	7.76942	1.00503	1780	94	4.46115	0.472362	57.4194	47
1.25337	1.19223	6.62252	2.38569	3660	795	4.03974	1.58052	61	66.25
1.10473	1.36403	0.879765	0.555556	286	87	0.419355	0.241667	47.6667	43.5
1.15275	1.13508	3.78378	1.22951	596	305	3.22162	0.625	85.1429	50.8333
1.20365	1.15188	14.5709	7.58427	5432	1719	10.8423	4.82865	74.411	63.6667
1.14214	1.26056	27.9678	1.85615	15850	358	31.8913	0.830627	114.029	44.75
1.07941	1.11362	3.78549	17.9756	664	10600	2.09464	18.4991	55.3333	102.913
1.20335	1.57353	8.47902	10.2526	5629	3902	4.92045	5.79792	58.0309	56.5507
1.21957	1.197	6.27803	10.9788	771	6685	3.4574	8.84259	55.0714	80.5422
1.174	1.14017	1.65017	5.93607	245	957	0.808581	4.36986	49	73.6154
1.13362	1.13247	1.75439	4.89642	267	1683	0.780702	3.16949	44.5	64.7308
1.1389	1.34885	5.17504	2.50818	1875	1340	2.85388	1.46129	55.1471	58.2609
1.13927	1.57849	2.9703	8.16697	483	4732	1.59406	4.29401	53.6667	52.5778
1.24916	1.16762	8.82353	0	453	0	4.44118	0	50.3333	0
1.17235	1.17816	2.86738	8.08823	2139	3548	2.55556	5.21765	89.125	64.5091
1.13426	1.17058	0	1.91781	0	289	0	0.791781	0	41.2857
1.1806	1.21768	1.52672	22.7886	618	10506	0.673937	15.7511	44.1429	69.1184
1.23229	1.29095	0	9.7973	0	6054	0	6.81757	0	69.5862
1.38096	1.11413	0.820793	0.191571	320	38	0.437756	0.0727969	53.3333	38
1.24055	1.16281	1.56863	19.5339	217	14226	0.85098	15.7891	54.25	80.8295
	1.16457		4.5292		2110		2.5149		55.5263
	1.20425		32.3326		13908		32.1201		99.3429
	1.28034		23.956		7217		15.8615		66.211
	1.33015		36.6619		21035		30.0071		81.8482
	1.13955		20.4204		4049		12.1592		59.5441
	1.11666		4.03727		719		2.23292		55.3077
	1.26087		1.90369		1023		1.14558		60.1765
	1.19449		1.60183		358		0.819222		51.1429
	1.17333		6.29139		1294		4.28477		68.1053
	1.08044		10.7143		676		6.03571		56.3333
	1.25662		19.9294		10410		18.3598		92.1239
	1.18585		2.53165		562		1.18565		46.8333
	1.20152		14.4481		7805		12.6705		87.6966
	1.21693		12.5		5509		9.43322		75.4657
	1.09206		14.8148		3427		11.5387		77.8864
	1.13434		37.2093		8661		33.5698		90.2188
	1.25821		12.5483		6007		11.5965		92.4154
	1.23639		3.56671		2146		2.83487		79.4815
	1.55456		0		0		0		0
	1.39912		0.297619		86		0.127976		43
	1.26411		5.25253		1509		3.04848		58.0385
	1.16649		3.06122		597		1.52296		49.75
	1.20868		0.289017		50		0.144509		50
	1.20714		0		0		0		0
	1.24171		5.48387		2668		4.30323		78.4706
	1.17993		6.78466		1412		4.16519		61.3913
	1.10411		2.08333		379		0.986979		47.375
	1.11975		0.928793		154		0.47678		51.3333
	1.23595		18.3533		13964		23.952		130.505
	1.05797		5.68182		250		2.84091		50
	1.08935		5.28302		806		3.04151		57.5714
	1.1584		3.88889		413		2.29444		59
	1.2422		0.244499		54		0.132029		54
	1.11233		21.7842		7501		15.5622		71.4381
	1.13725		3.43915		734		1.9418		56.4615
	1.07779		8.18505		1261		4.48754		54.8261
	1.15449		0.424629		81		0.171975		40.5
	1.31018		1.08401		370		0.501355		46.25
	1.20422		2.07039		557		1.15321		55.7
	1.12377		4.42891		1075		2.50583		56.5789
	1.12274		53.7736		10439		49.2406		91.5702
	1.33706		4.0146		1857		2.25912		56.2727
	1.20309		17.6796		9474		17.4475		98.6875
	1.17856		2.24949		596		1.21881		54.1818
	1.16343		8.29493		2247		5.17742		62.4167
	1.0468		9.52381		964		6.55782		68.8571
