# Supplementary material for: Junction Mapper is a novel computer vision tool to decipher cell–cell contact phenotypes
Source: eLife. 2019 Dec 3;8:e45413. doi: 10.7554/eLife.45413 (PMC7034980; doi:10.7554/eLife.45413)
Supplement: Source data 1. [file elife-45413-data1.xlsx]

## Sheet: Explanation
Source Data S7 complementing Supplementary file 2
Figure S7 Panel C data	C	Coverag index: Junction mapper vs manual

## Sheet: C
Junction Mapper		Manual
control	Rac1 expressing	control	Rac1 expressing
0.826541	0.581631	0.802223	0.270931
0.722557	0.602846	0.911663	0.482272
0.832546	0.395225	0.819586	0.338109
0.871882	0.582072	0.291326	0.494977
0.863029	0.915385	0.662903	0.606658
0.886756	0.836206	0.573938	0.60827
0.78834	0.627143	0.719046	0.57927
0.642014	0.581699	0.805161	0.398906
0.914864	0.745095	0.59029	0.483922
0.980055	0.602178	0.865593	0.633134
0.785478	0.55238	0.815776	0.420845
0.952701	0.667706	0.834479	0.543104
0.845308	0.844472	0.873715	0.326333
0.859916	0.680415	0.641161	0.607936
0.929257	1	0.795974	0.794337
0.445718	1	0.388205	0.390215
0.359028	0.231096	0.670492	0.033883
0.664158	0.715745	0.611842	0.644317
0.354475	0.472071	0.268707	0.467697
0.955844	0.463508	0.92972	0
1	0.381854	0.857868	0.1618
0.884885	0.610305	0.856912	0.251069
0.99134	0.684676	0.911216	0.488786
0.749277	0.60286	0.4237	0.560624
1	0.6137	1.04252	0.490002
1	0.600147	0.916807	0.478345
0.862428	0.61681	1.0355	0.512711
1	0.52576	0.921705	0.148111
0.947043	0.0495316	0.992525	0.0413302
1	0.700227	0.905055	0.55395
1	0.0385125	0.767366	0
0.915639	0.277037	0.843079	0.190632
0.919481	0.969764	0.986045	0.586836
0.914916	0.275199	0.934529	0.431758
1	0.736623	0.732888	0.664372
0.950239	0.618513	0.96039	0.338217
0.99157	0.547843	0.745909	0.461203
1	0.477087	1.24782	0.351199
0.861481	0.696294	0.972374	0.634071
1	0.234012	0.979629	0.158838
0.75649	0.686244	0.392784	0.670411
0.84714	0.674796	0.686708	0.514972
0.981437	0.244139	0.919915	0.196658
0.966934	0.07082	0.657875	0.0122359
0.780248		0.900864
0.980463		0.743189
0.864815		0.920656
0.965866		0.715921
0.964355		0.867262
0.944422		0.583581
0.92501		0.958949
0.96327		0.983068
0.929084		0.794125
0.934888		0.536743
0.927819		0.688464
