# Supplementary material for: Junction Mapper is a novel computer vision tool to decipher cell–cell contact phenotypes
Source: eLife. 2019 Dec 3;8:e45413. doi: 10.7554/eLife.45413 (PMC7034980; doi:10.7554/eLife.45413)
Supplement: Source data 2. [file elife-45413-data2.xlsx]

## Sheet: Explanation
Source Data S8 complementing Supplementary file 3
Figure S8 Panel C data	C	CIP4 siRNA user A vs user B: interface contour, fragmented junction contour, E-cadherin intensity, E-cadherin area
Figure S8 Panel D data	D	H-Ras user A vs user B: interface contour, fragmented junction contour, E-cadherin intensity, E-cadherin area
Figure S8 Panel E data	E	CIP4 siRNA user A vs user B: interface contour, fragmented junction contour, E-cadherin intensity, E-cadherin area
Figure S8 Panel F data	F	H-Ras user A vs user B: interface contour, fragmented junction contour, E-cadherin intensity, E-cadherin area

## Sheet: C
interface contour		fragmented junction contour		E-cadherin intensity		E-cadherin area
user A	user B	user A	user B	user A	user B	user A	user B
103.154	103.569	103.154	99.1543	68480	77403	616	701
111.983	105.125	111.983	104.947	79618	92641	662	788
63.9411	68.598	63.9411	63.1838	38062	42548	380	398
124.255	119.426	114.426	102.779	57062	55053	593	528
75.669	66.4975	68.0122	54.2548	40754	39288	388	352
136.853	126.51	131.853	120.51	79218	88749	773	854
59.1421	50.1421	54.3137	48.851	30216	30927	303	284
101.627	106.799	84.5563	79.3044	40649	46359	442	466
94.5269	97.9346	91.1127	88.9346	59387	67712	509	569
115.426	110.941	115.426	109.527	68455	79886	644	740
99.9411	105.527	87.6985	82.9691	37086	41345	418	419
89.2548	77.7695	64.5269	48.7498	27087	23596	306	238
15.8284	38.8995	13.4142	16.8284	8268	7962	96	85
137.125	123.782	111.983	63.0767	43839	34957	524	375
166.503	155.61	158.439	128.225	78426	73851	854	744
61.9706	65.5563	60.9706	59.2652	45683	55875	330	400
99.1127	95.7695	98.1127	64.9221	48487	45877	528	460
107.468	111.711	78.2548	28.7186	24557	19592	300	203
42.3137	44.7279	27.0711	10.4142	9894	7669	120	82
38.5564	39.9706	15.0711	11.8284	8091	6590	79	53
105.326	102.811	99.9117	89.1501	48163	49961	545	525
112.456	112.971	61.1421	28.4721	22482	14809	308	170
91.0122	77.2548	63.0416	37.7924	22792	19223	292	209
143.125	133.196	139.711	120.116	89952	95285	771	771
78.799	68.7279	74.799	50.0711	31644	28232	371	289
175.095	163.095	123.811	64.7446	41069	24859	602	308
187.924	188.302	175.267	135.254	88082	85481	954	850
62.6985	57.2132	44.6274	21.1942	17643	12992	205	130
117.284	118.799	88.3848	57.8627	31879	23373	434	275
196.581	192.451	124.468	76.1478	45930	35393	628	420
125.054	115.468	118.225	106.64	69257	76027	681	732
215.037	215.622	210.794	211.03	130300	147351	1224	1389
110.569	114.983	102.498	90.0833	48830	48373	545	504
72.6274	67.3848	44.5564	21.9515	15866	15234	200	152
67.9706	70.1421	52.7279	52.3587	22292	19067	257	179
74.8406	67.598	54.5269	53.0642	26952	25160	301	262
65.1772	74.5269	33.9706	11.0645	10801	10674	149	121
143.184	126.527	132.769	108.751	72645	74645	701	698
100.74	98.1543	65.9411	41.6274	31539	33527	371	328
119.983	118.255	118.983	110.898	62261	65739	585	569
148.924	133.752	144.681	122.251	72806	70057	768	683
107.468	94.0538	105.054	85.6265	53977	53521	523	485
130.225	127.912	121.569	89.4198	55035	49917	641	515
89.0833	93.598	34.9706	24.2426	17472	15318	209	154
101.698	98.4558	96.0416	81.2132	51750	54133	492	492
56.6274	58.0416	33.3137	22.4853	18654	16564	214	168
95.1838	89.7695	87.3553	66.327	37817	34091	435	359
123.64	104.569	93.0833	66.4198	39677	33753	454	341
86.799	88.799	77.3848	66.6897	32896	28947	372	300
118.64	118.154	92.7401	71.1618	38197	27748	494	305
140.012	144.669	136.598	121.898	79134	88143	742	803
68.6274	66.3848	60.3848	59.7264	28315	27428	303	252
116.042	113.456	100.971	54.4853	41291	32337	513	347
109.698	105.627	28.8995	6.41421	7255	6117	98	54
110.941	110.698	25.8995	2.82843	6782	1251	111	17
72.2548	61.7696	45.6985	14.8995	17152	10847	222	118
74.0416	76.799	53.9706	34.8041	21940	17947	275	191
56.6274	61.3848	46.799	31.6476	20479	16872	245	183
120.018	130.492	88.5685	12.3071	22527	8968	345	115
59.9706	61.7279	44.3137	23.3657	15565	12381	201	140
100.769	103.87	46.5564	25.8284	19496	17150	256	191
67.7695	60.1838	57.5269	29.3782	24284	18903	293	198
85.0416	83.9706	71.9706	59.0618	33086	30179	366	301
94.669	100.077	81.1838	48.2066	33048	25701	413	284
86.2132	87.3848	86.2132	77.7186	41518	43395	426	401
91.6396	75.8112	83.2254	69.5685	47325	45339	468	406
114.054	109.225	111.225	87.9051	57576	53873	618	528
46.3137	46.3137	37.3137	24.2426	13870	13322	156	140
119.012	117.769	113.184	88.9691	56092	54214	592	529
58.8701	62.2843	40.2132	31.0467	17360	13114	208	132
58.2132	54.1421	50.799	44.4675	23496	19668	271	194
133.338	138.51	119.267	80.5554	49148	35673	602	374
101.805	104.397	99.5685	82.9117	45420	40948	536	443
55.9411	51.598	52.5269	38.6985	26795	25253	296	245
55.0416	52.2132	53.0416	46.0778	24936	21381	287	221
66.4558	69.0416	61.6274	41.52	20297	10010	303	130
76.4264	74.8406	76.4264	53.9094	33824	27560	402	274
70.7695	67.0122	66.9411	53.916	34078	31642	367	302
80.8406	67.4975	80.8406	67.3193	48279	42657	475	386
88.4975	92.9696	87.0833	78.0833	49438	45133	514	429
76.6985	72.9706	72.8701	59.4302	36670	33989	390	326
96.5269	92.6985	93.5269	87.8701	53915	58438	509	518
65.3848	69.6274	65.3848	67.6274	39989	53764	368	473
85.799	75.8995	85.799	57.4049	42238	37796	464	368
100.983	103.74	100.983	93.4975	56545	52206	587	499
75.3259	77.5685	75.3259	63.4975	47775	51387	462	476
48.9706	47.5564	48.9706	47.5564	30440	32360	293	304
60.3553	57.1838	60.3553	52.9411	37454	35227	374	331
70.3137	70.7279	70.3137	70.7279	46309	60146	392	523
108.598	110.669	108.598	105.41	69131	78172	621	697
84.8406	80.669	81.0122	64.9411	49398	48583	473	418
54.1421	52.1421	54.1421	52.1421	34818	39466	308	339
78.7401	78.1543	78.7401	78.1543	66919	78289	492	595
45.3848	45.1421	39.5564	32.3137	20452	21929	213	203
120.562	116.148	107.083	96.9976	52412	49793	554	472
60.9706	66.5563	60.9706	61.8902	42115	54245	350	457
95.1127	97.4558	90.2843	80.0416	42212	44872	444	440
75.4975	71.7695	67.2548	52.1127	31685	27586	392	306
100.841	100.083	93.1838	51.7785	36059	27044	460	300
68.5563	69.3137	65.5563	54.0711	34629	32595	350	307
46.6274	57.8701	46.6274	49.9866	26687	30107	273	283
97.1127	92.2132	80.6274	55.8184	31880	23955	388	255
39.6274	36.3848	39.6274	35.2066	24779	25025	221	214
111.468	108.125	89.4975	40.0996	32992	21186	440	232
52.1127	49.6985	50.1127	21.4062	19944	12670	269	137
91.5455	78.3553	74.669	52.0996	33594	31324	364	312
72.6274	71.7279	56.3848	39.2395	19874	16113	278	198
50.1421	54.1421	50.1421	48.1421	27729	30306	286	300
105.397	97.7401	105.397	89.239	56463	52334	588	496
29.9706	30.6208	29.9706	30.4427	19589	19252	191	181
94.2843	93.4558	94.2843	82.5891	44485	43600	485	446
42.4558	41.2843	42.4558	41.2843	35713	41789	269	321
131.841	131.012	124.426	82.1973	57417	54451	668	557
112.255	112.669	112.255	64.0351	55098	53096	582	507
109.711	108.468	106.296	92.397	53295	47946	619	515
89.799	91.2132	89.799	85.2132	48736	57074	496	573
32.1421	33.7279	32.1421	33.476	19770	23411	195	213
74.2132	77.8701	74.2132	77.8701	46799	57306	417	508
148.953	143.368	147.953	104.271	67131	61484	763	621
62.3137	67.7279	62.3137	67.7279	38460	49903	350	438
82.5685	74.9828	82.5685	74.9828	63755	67284	492	507
27.6568	28.2426	27.6568	28.2426	19526	24815	170	205
85.2254	87.9828	85.2254	87.9828	54792	57061	531	526
97.4558	90.5563	81.9706	40.2948	24968	14870	350	180
106.87	108.941	71.9706	37.5853	18966	7419	284	87
95.2843	98.8701	89.4558	69.1141	29677	23488	379	255
61.3553	49.9411	54.5269	34.0351	24984	21296	265	200
87.3259	95.1543	81.4975	51.6602	25104	20094	329	220
86.2843	85.4558	75.6274	67.2132	39427	39532	390	369
62.0122	54.9411	43.5269	32.7439	19042	13620	234	145
74.1127	79.6274	53.6274	20.641	16970	10665	230	117
60.6985	63.799	44.2132	41.6224	18647	16211	229	169
79.1838	74.5269	69.9411	29.3969	26250	14666	329	158
118.255	111.598	102.184	50.95	37638	22285	521	257
146.841	135.113	106.042	40.0384	31998	16333	468	196
60.5269	69.8406	47.2843	18.1356	17257	14236	229	158
69.799	65.3848	50.7279	33.1701	22386	19018	264	198
124.326	128.74	118.912	115.442	57553	60046	660	656
108.532	107.316	91.397	63.2996	34426	24330	456	278
30.4853	37.8995	26.6568	18.733	8823	7295	112	79
150.145	135.054	97.2548	34.5658	30043	16413	428	197
84.2548	83.4975	74.1838	36.3755	31064	27527	367	270
121.196	118.439	113.125	66.3707	43928	37749	520	407
101.326	101.326	85.2548	62.2351	35916	31108	404	314
45.3848	39.7279	37.5564	32.8204	20576	20420	201	181
149.539	153.973	119.154	70.152	45178	34660	558	374
73.0122	70.1838	38.0416	13.3071	13956	7841	183	88
76.799	74.9706	74.3848	64.1356	39949	41656	373	359
103.498	107.498	92.8406	55.799	44475	44120	443	372
126.426	119.941	125.426	112.763	66737	71541	653	668

## Sheet: D
interface contour		fragmented junction contour		E-cadherin intensity		E-cadherin area
user A	user B	user A	user B	user A	user B	user A	user B
29.9706	33.2132	0	0	0	0	28	10
161.853	158.711	0	0	237	181	145	134
36.9706	26.8995	7.82843	0	1786	619	57	45
35.4558	28.3137	9.07107	3.23607	4546	1119	67	63
67.4558	72.6274	25.6568	34.5054	9578	10763	160	190
40.799	39.799	26.5563	18.4853	11665	10946	201	190
79.3553	81.6985	1	0	898	605	81	68
42.799	36.4853	6.24264	2.41421	1313	571	400	387
63.6274	62.5564	10.8284	48.5264	4128	3405	197	173
67.669	67.0833	2.82843	2.82843	4603	4510	170	165
85.1838	76.669	12.4142	4.65028	5453	4474	222	220
102.154	103.043	51.1127	38.3877	16155	11449	197	193
36.3848	48.6274	36.3848	45.0351	12867	15319	79	73
43.0416	54.2132	5.41421	4.23607	1478	2042	40	55
113.983	123.207	44.2132	44.6181	14434	13815	73	26
131.569	116.326	103.841	90.6466	33665	28934	155	140
63.5564	69.3137	58.7279	58.3137	19871	20535	113	96
60.2132	48.5564	25.7279	11.8864	11118	6357	477	435
45.1127	34.4558	11.8995	9.30714	6245	5277	322	308
80.5563	79.4853	58.3137	59.1942	17962	16837	291	281
114.154	110.154	103.326	97.9762	34083	33333	109	72
39.8995	33.0711	30.0711	9.41421	11389	8586	331	302
23.0711	21.6568	17.6568	14.5765	8023	6780	281	211
144.669	141.113	109.77	86.2039	43231	38232	453	388
48.1127	47.8701	45.6985	39.5072	18471	16401	174	143
45.799	42.3848	41.5564	40.3848	13273	12970	189	151
62.0122	58.7696	40.8701	44.1647	20698	19898	0	0
27.1421	29.0711	5.41421	9.0645	4607	4707	4	3
101.698	104.456	75.799	73.547	21544	20834	63	16
79.6274	83.0416	49.7279	51.1123	13782	13614	134	146
70.1772	56.598	8.07107	6.88635	2760	4072	14	10
84.4558	87.3848	36.3137	37.2426	12146	12750	20	9
49.9411	43.9411	12.4853	3.65028	5203	4872	81	64
55.8701	68.5269	3	4	2652	4077	216	161
92.7695	84.3553	8.07107	2.82843	3798	2063	23	32
19.3137	17.8995	7.24264	0	5347	1930	421	363
64.2132	66.2132	36.1421	35.3165	10480	9503	250	259
37.7279	33.2426	22.4853	15	9692	8001	235	221
164.841	165.769	103.698	102.29	38989	36745	134	101
91.5563	91.3137	78.7279	81.7836	25956	25191	84	73
153.634	135.409	58.4264	50.1959	19909	19402	502	433
46.4558	56.2132	40.2132	39.3848	14679	15203	53	56
147.012	140.113	14	24.5757	3316	3087	280	266
56.7279	43.799	21.2426	9.82843	10521	6722	51	26
97.9411	95.1127	66.4558	61.1061	28251	26251	167	173
84.0416	68.8995	67.1421	56.8995	25511	17944	399	359
107.941	92.2843	91.8701	76.7738	35669	31124	197	192
35.9706	41.0416	33.5564	25.8269	13575	13547	96	93
63.0416	50.2132	45.3848	39.547	18543	15533	197	136
111.468	120.782	94.8112	73.7717	39628	36864	57	112
66.3137	55.8995	47.6568	39.0711	18082	18451	210	211
115.698	108.042	18.2426	20.1818	8322	8362	134	74
54.6274	53.4558	13.4853	12.4787	10383	9950	44	62
169.439	166.782	19.4853	8.0645	15796	9776	159	164
47.2843	55.2843	6.82843	15.0711	6236	10636	52	48
68.7695	68.8406	38.9706	58.4467	17889	18852	103	97

## Sheet: E
interface contour				fragmented junction contour				E-cadherin intensity per interface area				Cluster density
user A		user B		user A		user B		user A		user B		user A		user B
NT	CIP4	NT	CIP4	NT	CIP4	NT	CIP4	NT	CIP4	NT	CIP4	NT	CIP4	NT	CIP4
101.805	103.154	104.397	103.569	99.5685	103.154	82.9117	99.1543	536	616	443	701	84.7388	111.169	92.4334	110.418
55.9411	111.983	51.598	105.125	52.5269	111.983	38.6985	104.947	296	662	245	788	90.5237	120.269	103.073	117.565
55.0416	63.9411	52.2132	68.598	53.0416	63.9411	46.0778	63.1838	287	380	221	398	86.885	100.163	96.7466	106.904
66.4558	124.255	69.0416	119.426	61.6274	114.426	41.52	102.779	303	593	130	528	66.9868	96.226	77	104.267
76.4264	75.669	74.8406	66.4975	76.4264	68.0122	53.9094	54.2548	402	388	274	352	84.1393	105.036	100.584	111.614
70.7695	136.853	67.0122	126.51	66.9411	131.853	53.916	120.51	367	773	302	854	92.8556	102.481	104.775	103.921
80.8406	59.1421	67.4975	50.1421	80.8406	54.3137	67.3193	48.851	475	303	386	284	101.64	99.7228	110.51	108.898
88.4975	101.627	92.9696	106.799	87.0833	84.5563	78.0833	79.3044	514	442	429	466	96.1829	91.9661	105.205	99.4828
76.6985	94.5269	72.9706	97.9346	72.8701	91.1127	59.4302	88.9346	390	509	326	569	94.0256	116.674	104.261	119.002
96.5269	115.426	92.6985	110.941	93.5269	115.426	87.8701	109.527	509	644	518	740	105.923	106.297	112.815	107.954
65.3848	99.9411	69.6274	105.527	65.3848	87.6985	67.6274	82.9691	368	418	473	419	108.666	88.7225	113.666	98.6754
85.799	89.2548	75.8995	77.7695	85.799	64.5269	57.4049	48.7498	464	306	368	238	91.0302	88.5196	102.707	99.1429
100.983	15.8284	103.74	38.8995	100.983	13.4142	93.4975	16.8284	587	96	499	85	96.3288	86.125	104.621	93.6706
75.3259	137.125	77.5685	123.782	75.3259	111.983	63.4975	63.0767	462	524	476	375	103.409	83.6622	107.956	93.2187
48.9706	166.503	47.5564	155.61	48.9706	158.439	47.5564	128.225	293	854	304	744	103.891	91.8337	106.447	99.2621
60.3553	61.9706	57.1838	65.5563	60.3553	60.9706	52.9411	59.2652	374	330	331	400	100.144	138.433	106.426	139.688
70.3137	99.1127	70.7279	95.7695	70.3137	98.1127	70.7279	64.9221	392	528	523	460	118.135	91.8314	115.002	99.7326
108.598	107.468	110.669	111.711	108.598	78.2548	105.41	28.7186	621	300	697	203	111.322	81.8567	112.155	96.5123
84.8406	42.3137	80.669	44.7279	81.0122	27.0711	64.9411	10.4142	473	120	418	82	104.436	82.45	116.227	93.5244
54.1421	38.5564	52.1421	39.9706	54.1421	15.0711	52.1421	11.8284	308	79	339	53	113.045	102.418	116.419	124.34
78.7401	105.326	78.1543	102.811	78.7401	99.9117	78.1543	89.1501	492	545	595	525	136.014	88.3725	131.578	95.1638
45.3848	112.456	45.1421	112.971	39.5564	61.1421	32.3137	28.4721	213	308	203	170	96.0188	72.9935	108.025	87.1118
120.562	91.0122	116.148	77.2548	107.083	63.0416	96.9976	37.7924	554	292	472	209	94.6065	78.0548	105.494	91.9761
60.9706	143.125	66.5563	133.196	60.9706	139.711	61.8902	120.116	350	771	457	771	120.329	116.669	118.698	123.586
95.1127	78.799	97.4558	68.7279	90.2843	74.799	80.0416	50.0711	444	371	440	289	95.0721	85.2938	101.982	97.6886
75.4975	175.095	71.7695	163.095	67.2548	123.811	52.1127	64.7446	392	602	306	308	80.8291	68.2209	90.1503	80.711
100.841	187.924	100.083	188.302	93.1838	175.267	51.7785	135.254	460	954	300	850	78.3891	92.3291	90.1467	100.566
68.5563	62.6985	69.3137	57.2132	65.5563	44.6274	54.0711	21.1942	350	205	307	130	98.94	86.0634	106.173	99.9385
46.6274	117.284	57.8701	118.799	46.6274	88.3848	49.9866	57.8627	273	434	283	275	97.7546	73.4539	106.385	84.9927
97.1127	196.581	92.2132	192.451	80.6274	124.468	55.8184	76.1478	388	628	255	420	82.165	73.1369	93.9412	84.269
39.6274	125.054	36.3848	115.468	39.6274	118.225	35.2066	106.64	221	681	214	732	112.122	101.699	116.939	103.862
111.468	215.037	108.125	215.622	89.4975	210.794	40.0996	211.03	440	1224	232	1389	74.9818	106.454	91.319	106.084
52.1127		49.6985		50.1127		21.4062		269		137		74.1413		92.4818
91.5455		78.3553		74.669		52.0996		364		312		92.2912		100.397
72.6274		71.7279		56.3848		39.2395		278		198		71.4892		81.3788
50.1421		54.1421		50.1421		48.1421		286		300		96.9545		101.02
105.397		97.7401		105.397		89.239		588		496		96.0255		105.512
29.9706		30.6208		29.9706		30.4427		191		181		102.56		106.365
94.2843		93.4558		94.2843		82.5891		485		446		91.7216		97.7579
42.4558		41.2843		42.4558		41.2843		269		321		132.762		130.184
131.841		131.012		124.426		82.1973		668		557		85.9536		97.7576
112.255		112.669		112.255		64.0351		582		507		94.6701		104.726
109.711		108.468		106.296		92.397		619		515		86.0986		93.099
89.799		91.2132		89.799		85.2132		496		573		98.2581		99.6056
32.1421		33.7279		32.1421		33.476		195		213		101.385		109.911
74.2132		77.8701		74.2132		77.8701		417		508		112.228		112.807
148.953		143.368		147.953		104.271		763		621		87.983		99.008
62.3137		67.7279		62.3137		67.7279		350		438		109.886		113.934
82.5685		74.9828		82.5685		74.9828		492		507		129.583		132.71
27.6568		28.2426		27.6568		28.2426		170		205		114.859		121.049
85.2254		87.9828		85.2254		87.9828		531		526		103.186		108.481
97.4558		90.5563		81.9706		40.2948		350		180		71.3371		82.6111
106.87		108.941		71.9706		37.5853		284		87		66.7817		85.2759
95.2843		98.8701		89.4558		69.1141		379		255		78.3034		92.1098
61.3553		49.9411		54.5269		34.0351		265		200		94.2792		106.48
87.3259		95.1543		81.4975		51.6602		329		220		76.304		91.3364
86.2843		85.4558		75.6274		67.2132		390		369		101.095		107.133
62.0122		54.9411		43.5269		32.7439		234		145		81.3761		93.931
74.1127		79.6274		53.6274		20.641		230		117		73.7826		91.1539
60.6985		63.799		44.2132		41.6224		229		169		81.4279		95.9231
79.1838		74.5269		69.9411		29.3969		329		158		79.7872		92.8228
118.255		111.598		102.184		50.95		521		257		72.2418		86.7121
146.841		135.113		106.042		40.0384		468		196		68.3718		83.3316
60.5269		69.8406		47.2843		18.1356		229		158		75.3581		90.1013
69.799		65.3848		50.7279		33.1701		264		198		84.7955		96.0505
124.326		128.74		118.912		115.442		660		656		87.2015		91.5335
108.532		107.316		91.397		63.2996		456		278		75.4956		87.518
30.4853		37.8995		26.6568		18.733		112		79		78.7768		92.3418
150.145		135.054		97.2548		34.5658		428		197		70.1939		83.3147
84.2548		83.4975		74.1838		36.3755		367		270		84.6431		101.952
121.196		118.439		113.125		66.3707		520		407		84.4769		92.7494
101.326		101.326		85.2548		62.2351		404		314		88.901		99.0701
45.3848		39.7279		37.5564		32.8204		201		181		102.368		112.818
149.539		153.973		119.154		70.152		558		374		80.9642		92.6738
73.0122		70.1838		38.0416		13.3071		183		88		76.2623		89.1023
76.799		74.9706		74.3848		64.1356		373		359		107.102		116.033
103.498		107.498		92.8406		55.799		443		372		100.395		118.602
126.426		119.941		125.426		112.763		653		668		102.201		107.097

## Sheet: F
interface contour						fragmented junction contour						E-cadherin intensity per interface area						Cluster density
user A			user B			user A			user B			user A			user B			user A			user B
control	en	ee	control	en	ee	control	en	ee	control	en	ee	control	en	ee	control	en	ee	control	en	ee	control	en	ee
36.9706	29.9706	60.2132	26.8995	33.2132	48.5564	7.82843	0	25.7279	0	0	11.8864	7.83333	0	31.5852	3.57803	0	21.9965	63.7857	59.25	82.9702	61.9	60.3333	85.9054
40.799	161.853	70.1772	39.799	158.711	56.598	26.5563	0	8.07107	18.4853	0	6.88635	45.5664	0.249474	6.76471	43.6096	0.197814	11.2486	80.4483	72.1587	62.7273	81.6866	69.9375	65.6774
63.6274	35.4558	84.4558	62.5564	28.3137	87.3848	10.8284	9.07107	36.3137	48.5264	3.23607	37.2426	11.0374	19.3447	25.1992	9.48468	6.14835	26.1807	72.421	71.4776	76.3899	75.6667	73.7192	77.7439
67.669	67.4558	147.012	67.0833	72.6274	140.113	2.82843	25.6568	14	2.82843	34.5054	24.5757	10.7799	24.1259	4.06871	10.5869	25.6873	4.02477	68.7015	64.1429	63.7692	71.5873	60.5	64.3125
36.3848	79.3553	115.698	48.6274	81.6985	108.042	36.3848	1	18.2426	45.0351	0	20.1818	55.4612	1.91064	12.9224	51.2341	1.27907	13.9833	80.4188	65.65	80.7961	80.6263	63.4444	86.2062
113.983	42.799		123.207	36.4853		44.2132	6.24264		44.6181	2.41421		21.6727	4.93609		21.5859	2.60731		71.8109	67.321		72.7105	69.9062
45.1127	85.1838		34.4558	76.669		11.8995	12.4142		9.30714	4.65028		21.684	10.906		22.7457	9.47881		77.0988	74.7917		77.6029	71.1118
114.154	102.154		110.154	103.043		103.326	51.1127		97.9762	38.3877		50.7943	26.4403		51.2028	20.4446		85.2075	64.2609		86.1318	63.8125
48.1127	43.0416		47.8701	54.2132		45.6985	5.41421		39.5072	4.23607		59.9708	5.41392		54.4884	6.28308		93.7614	79.9644		94.8035	79.708
45.799	131.569		42.3848	116.326		41.5564	103.841		40.3848	90.6466		47.2349	44.2961		49.5038	43.1851		78.0765	79.484		78.6061	79.2857
62.0122	63.5564		58.7696	69.3137		40.8701	58.7279		44.1647	58.3137		52.9361	54.5907		53.9241	53.062		93.2342	76.434		90.4455	76.1855
79.6274	80.5563		83.0416	79.4853		49.7279	58.3137		51.1123	59.1942		30.3568	40.0045		28.7822	38.8845		69.9594	84.9925		70.5389	85.0099
49.9411	39.8995		43.9411	33.0711		12.4853	30.0711		3.65028	9.41421		16.2087	47.8529		16.7423	42.93		65.8608	95.5119		66.7397	92.8767
55.8701	23.0711		68.5269	21.6568		3	17.6568		4	14.5765		8.92929	53.4867		11.0788	48.0851		66.3	86.1175		74.1273	88.2956
19.3137	144.669		17.8995	141.113		7.24264	109.77		0	86.2039		39.0292	53.9713		15.0781	49.4592		73.2466	86.9245		74.2308	84.0536
64.2132	27.1421		66.2132	29.0711		36.1421	5.41421		35.3165	9.0645		27.9467	25.5944		24.6831	26.15		67.6129	76.9429		67.8786	78.3233
37.7279	101.698		33.2426	104.456		22.4853	75.799		15	73.547		42.1391	38.2664		40.6142	36.2962		85.7699	74.4706		83.3438	79.3461
164.841	92.7695		165.769	84.3553		103.698	8.07107		102.29	2.82843		42.8922	7.05948		40.6471	4.16768		81.7379	87.8982		84.4713	87.8786
91.5563	46.4558		91.3137	56.2132		78.7279	40.2132		81.7836	39.3848		51.5	50.7924		50.6861	45.3821		80.6087	99.3183		81.789	102.685
153.634	111.468		135.409	120.782		58.4264	94.8112		50.1959	73.7717		23.204	58.8826		23.3478	50.707		68.4158	91.7868		69.0463	96.099
56.7279	66.3137		43.799	55.8995		21.2426	47.6568		9.82843	39.0711		32.273	48.6075		24.9888	58.022		96.5229	108.156		93.3611	106.989
97.9411	54.6274		95.1127	53.4558		66.4558	13.4853		61.1061	12.4787		54.75	31.5593		48.3444	30.4281		85.3505	80.1827		86.9238	71.8824
84.0416	169.439		68.8995	166.782		67.1421	19.4853		56.8995	8.0645		53.3703	16.0855		46.8512	10.4		90.7865	109.403		85.0427	94.9643
107.941	47.2843		92.2843	55.2843		91.8701	6.82843		76.7738	15.0711		58.3781	20.7867		59.2838	31.2824		78.7395	85.1857		80.2165	89.346
35.9706	68.7695		41.0416	68.8406		33.5564	38.9706		25.8269	58.4467		59.5395	42.6945		51.5095	43.9441		78.0172			94.7343
63.0416			50.2132			45.3848			39.547			49.9811			51.264			98.1111			102.868
