# Supplementary material for: Junction Mapper is a novel computer vision tool to decipher cell–cell contact phenotypes
Source: eLife. 2019 Dec 3;8:e45413. doi: 10.7554/eLife.45413 (PMC7034980; doi:10.7554/eLife.45413)
Supplement: Source data 3. [file elife-45413-data3.xlsx]

## Sheet: Explanation
Source Data complementing Scheme 1
Scheme 1 Panel C data	C	Epithelia control vs RacQL, replicate 1 vs replicate 2: Coverage Index
Scheme 1 Panel D data	D	Epithelia control vs RacQL, replicate 1 vs replicate 2: Interface Occupancy

## Sheet: C
control		RacQL
replicate 1	replicate 2	replicate 1	replicate 2
0.61978	0.481272	0.249529	0.188292
0.57125	0.874618	0.44366	0
0.362198	0.0144691	0.231461	0.591863
0.760622	0.943982	0.181333	0.253905
0.74442	0.437055	0	0
0.480288	0.997706	0.153137	0.317477
0.92258	0.970939	0.0668869	0.301412
0.156772	0.976464	0	0.0215026
0.015784	0.818433	0.18125	0.691762
0	0.967981	0	0
0.294124	0.69452	0.826641	0.24346
0	0.945833	0.291871	0.273469
0.0289255	1	0.0557516	0.224972
0	0.709783	0.330103	0.167189
0.035058	1	0.236708	0
0.339904	0.962386	0.630602	0.603648
1	1	0	0.680708
1	0.73482	0	0.0411966
1	0.943458	0	0.347926
1	0.888192	0	0.386434
1	0.935368	0.172988	0
0.996862	1		0
1	0.81704		0.136364
1	0.795813		0.035523
1	0.671713		0.192273
1	0.771803		0.514453
1	1		0.243876
1	0.99394		0.177156
1	0.994534		0.414728
1	0.912465		0.263864
1	0.856973		0.129259
1	0.923162		0.206984
	0.632129		0
	0.727189		0
	0.619004		0.0113437
	0.982898		0.0898046
	0.881517		0.010021
	0.941203		0.0396076
	0.89673		0.705538
			0
			0.0232116
			0
			0
			0
			0.291142
			0.122289
			0.0277897
			0.206546
			0.572203
			0.829224
			0.354266

## Sheet: D
control		RacQL
replicate 1	replicate 2	replicate 1	replicate 2
39.5756	35.6021	14.899	14.4854
40	69.2161	39.8821	4.17755
39.6088	10.7905	25.5708	51.069
54.955	67.5171	14.8055	13.282
67.0404	35.8628	0	1.46535
49.8843	70.5021	9.16598	22.8012
66.8605	80.6278	6.82057	20.8379
18.299	76.6736	0	5.58171
6.87443	65.9712	19.6429	20.6965
1.42857	74.7253	0	0.0437063
17.7858	46.0055	76.6242	15.4642
1.37795	80.0319	29.3814	13.9143
1.91956	91.1596	5.56003	30.5038
0.922722	59.1522	32.3058	18.134
5.39499	83.3333	19.5853	0.820046
28.0093	80.8845	55.0058	42.3434
97.1272	84.0361	0	61.8056
97.8405	54.5167	2.79553	7.79989
100	83.035	0	33.4107
100	69.2825	0.111607	36.3075
100	81.9733	15.7957	0.271634
87.0968	81.4714		4.28894
97.3366	54.5209		8.62866
95.5032	76.8382		3.65385
100	72.2902		21.2101
99.7519	58.5612		40.0308
94.9645	72.8314		21.9958
100	87.1017		13.1422
100	71.8408		35.7244
100	81.2692		22.5295
100	71.2314		3.32068
96.5753	72.5701		21.3512
	60.0756		0.425532
	55.5667		0.729167
	47.9186		3.42882
	78.854		7.46978
	65.2223		5.9833
	78.5366		9.10256
	69.4459		45.4047
			0
			4.73511
			0.969697
			2.32975
			4.17219
			11.4627
			8.77193
			4.17335
			19.1342
			49.0114
			69.8241
			27.0399
