# Supplementary material for: Junction Mapper is a novel computer vision tool to decipher cell–cell contact phenotypes
Source: eLife. 2019 Dec 3;8:e45413. doi: 10.7554/eLife.45413 (PMC7034980; doi:10.7554/eLife.45413)
Supplement: Supplementary file 1. — Type of microscope, image characteristics, image resolution, user-controlled settings and replicate type are outlined. [file elife-45413-supp1.xlsx]

## Sheet: Sheet1
		Supplementary file 1
										Image Analysis - user defined
		experiment	microscope	image type	image type	pixel size (microns)	image size (pixels)	lenses	staining	thresholding	dilation	replicate experiments
		active H-Ras	Olympus Provis BX51	wide field	single image	0.378 x 0.378	800 x 600	40x/1.00 NA Oil Iris UplanApo	E-cadherin	54	2	technical
		active Src	Olympus Provis BX51	wide field	single image	0.378 x 0.378	800 x 600	40x/1.00 NA Oil Iris UplanApo	E-cadherin	25	5	biological (N=2)
		active Rac1	Leica DM IRBE	confocal	single image	0.166 x 0.166	1024 x 1024	40x 1.00 NA Oil PL Fluotar	E-cadherin	54	2	technical
		CIP4 RNAi	Olympus Provis BX51	wide field	single image	0.378 x 0.378	800 x 600	40x/1.00 NA Oil Iris UplanApo	E-cadherin	50	2	technical
		EEF1A RNAi	Olympus Provis BX51	wide field	single image	0.378 x 0.378	800 x 600	40x/1.00 NA Oil Iris UplanApo	E-cadherin	75	2	technical
		VAV2 RNAi	Olympus Provis BX51	wide field	single image	0.378 x 0.378	800 x 600	40x/1.00 NA Oil Iris UplanApo	E-cadherin	60	2	technical
		endothelial cells	NIKON Ti Eclipse	widefield	single image	0.133 x 0.133	1004 x 1002	60× 1.49 NA Oil Apochromat	VE-cadherin	16	6	biological (N=2)
		cardiomyocytes	Zeiss LSM-780 inverted	confocal	max intensity projections	0.2636 X 0.2636	512 x 512	63x 1.4 NA oil plan Acromat	b-catenin	54	3	technical
									connexin 43	37	3
