# Supplementary material for: Junction Mapper is a novel computer vision tool to decipher cell–cell contact phenotypes
Source: eLife. 2019 Dec 3;8:e45413. doi: 10.7554/eLife.45413 (PMC7034980; doi:10.7554/eLife.45413)
Supplement: Supplementary file 5. [file elife-45413-supp5.xlsx]

## Sheet: Sheet1
	Suplementary file 5
			Variance (SD^2 from PRISM)
Experiment	Staining	Statistical test used	Interface contour			Straigh-line interface length			interface Linearity Index			Fragmented Junction Length			Coverage index			Interface area			E-cadherin Area
			control	en	ee	control	en	ee	control	en	ee	control	en	ee	control	en	ee	control	en	ee	control	en	ee
H-Ras	E-cadherin	One-way ANOVA + Games Howell post-hoc tetst	1171.18	1244.45	1219.11	865.244	900.778	839.007	0.00518505	0.00715277	0.00543874	730.524	596.354	361.372	734.099	720.665	517.006	36272.8	38395.3	36648.3	14006.3	11112.8	7250.44
Rac1	E-cadherin	One-way ANOVA + Games Howell post-hoc tetst	2790.91	6970.92	9672.39	2054.27	4958.44	6938.07	0.00302563	0.00891616	0.00480398	2569.57	5893.26	5147.57	223.461	651.153	654.135	445304	1.11992e+06	1.55161e+06	308873	739436	576383
Src	E-cadherin	One-way ANOVA + Games Howell post-hoc tetst	946.872	981.89	1434.73	738.308	970.851	716.89	0.00255636	0.00575869	0.00183764	669.129	480.914	702.586	505.33	513.109	741.674	28667.6	29636.1	41215.5	15857.1	10998.4	18486.2
CIP4	E-cadherin	KS normality test + Mann-Whitney U-test	876.55	1156.98	N/A	669.965	897.025	N/A	0.00208224	0.00187776	N/A	843.648	1245.03	N/A	358.016	505.86	N/A	27211.8	35394	N/A	25385.5	36262.4	N/A
EEF1a	E-cadherin	KS normality test + Mann-Whitney U-test	1114.96	1694.67	N/A	822.404	1287.59	N/A	0.00248036	0.00182958	N/A	1127.39	1718.5	N/A	1014.8	506.88	N/A	34351	51399	N/A	26870.5	46956.5	N/A
VAV2	E-cadherin	KS normality test + Mann-Whitney U-test	1628.93	936.972	N/A	1269.5	737.666	N/A	0.00179352	0.00190358	N/A	1694.15	1128.29	N/A	786.803	691.69	N/A	50670	28730.2	N/A	52258	27889	N/A
Endothelial cells	VE-cadherin	KS normality test + Mann-Whitney U-test	17768.9	6187.4	N/A	13549	4472.93	N/A	0.0067322	0.0042302	N/A	15675	5685.16	N/A	870.25	579.846	N/A	4004001	1390041	N/A	2653641	1281424	N/A
Cardiomyocytes	b-catenin	KS normality test + Mann-Whitney U-test	1813.06	1555.51	N/A	1252.45	1047.82	N/A	0.0194603	0.0169781	N/A	192.377	558.85	N/A	351.938	478.734	N/A	55696	46915.6	N/A	3646.95	11299.7	N/A
	connexin-43	KS normality test + Mann-Whitney U-test	1813.06	1555.51	N/A	1252.45	1047.82	N/A	0.0194603	0.0169781	N/A	36.8449	73.6851	N/A	38.3161	119.684	N/A	55696	46915.6	N/A	603.685	1430.35	N/A
			Variance (SD^2 from PRISM)
	Experiment	Staining	% Interface occupancy			Summed E-cadherin intensity			E-cadherin intensity per interface area			Cluster density			E-cadherin junction distance			Junction Linearity			Straight-line junction length
			control	en	ee	control	en	ee	control	en	ee	control	en	ee	control	en	ee	control	en	ee	control	en	ee
	H-Ras	E-cadherin	430.323	373.654	329.05	1.20297	0.918705	0.510967	433.176	343.405	237.52	171.837	216.713	172.84	730.524	596.354	361.372	0.0922881	0.0962502	0.0732701	865.244	900.778	839.007
	Rac1	E-cadherin	202.274	609.16	511.641	0.25226	1.22574	0.683032	327.059	1270.94	789.59	178.92	640.827	692.188	2569.57	5893.26	5147.57	0.0295617	0.0840318	0.0871745	2569.57	5893.26	5147.57
	Src	E-cadherin	432.64	396.01	580.328	1.0201	0.5329	0.55428	426.422	291.044	286.286	82.0836	59.6602	43.073	669.257	479.172	484	0.0618517	0.0683823	0.0951722	738.209	716.633	970.946
	CIP4	E-cadherin	452.969	496.844	N/A	3.16296	3.84514	N/A	883.254	671.333	N/A	339.569	284.492	N/A	843.648	1245.03	N/A	0.0456292	0.063641	N/A	669.965	897.025	N/A
	EEF1a	E-cadherin	784.486	523.576	N/A	3.41268	7.12691	N/A	1116.31	1108.99	N/A	142.371	336.779	N/A	1127.39	1718.5	N/A	0.132419	0.0674767	N/A	822.404	1287.59	N/A
	VAV2	E-cadherin	854.393	545.69	N/A	446688225	292615236	N/A	756.8	723.61	N/A	76.8778	166.41	N/A	1694.15	1128.29	N/A	0.0965345	0.0859076	N/A	1269.5	737.666	N/A
	Endothelial cells	VE-cadherin	1126.94	666.672	N/A	23.873	17.6484	N/A	128.142	116.424	N/A	21.6876	37.5524	N/A	15675	5685.16	N/A	0.116691	0.0825988	N/A	13549	4472.93	N/A
	Cardiomyocytes	b-catenin	197.684	287.302	N/A	0.443556	1.30416	N/A	300.329	442.261	N/A	249.956	317.552	N/A	192.377	558.85	N/A	0.051529	0.0715563	N/A	1252.45	1047.82	N/A
		connexin-43	19.9988	64.3044	N/A	4.63541	11.6213	N/A	16.8182	57.2898	N/A	650.25	667.189	N/A	N/A	N/A	N/A	N/A	N/A	N/A	N/A	N/A	N/A
